# Supplementary material for: Performance of longitudinal item response theory models in shortened or partial assessments
Source: PubMed Central journal article supplement (PMC7520414; doi:10.1007/s10928-020-09697-x), 2020-07-02

## Supplementary Materials 2

Journal of Pharmacokinetics and Pharmacodynamics

Title: Performance of Longitudinal Item Response Theory Models in Shortened Assessments

Authors: Leticia Arrington<sup>1,2</sup>, Sebastian Ueckert<sup>1</sup>, Malidi Ahamadi<sup>2\*</sup>, Sreeraj Macha<sup>2\*</sup> and Mats O. Karlsson<sup>1,3</sup>

1 Department of Pharmaceutical Biosciences, Uppsala University, P.O. Box 591, 751 24 Uppsala, Sweden

2Merck & Co. Inc. Kenilworth, NJ, USA

3Corresponding author: email Mats.Karlsson@farmbio.uu.se and phone +46 184 714 105

\*Affiliation at time of work

This appendix contains diagnostic plots (i.e. Categorical VPC and ICC) evaluating the performance of the 100% information scenario from a unidimensional IRT model using simultaneous approach.

Figure S1. Categorical Visual predictive checks (VPCs) describing the time-courses of each score for the MDS- UPDR motor item. Median (blue solid line) of the observed data is compared to the 95% prediction interval (gray shaded area) for the simulated data

ITEM == 14

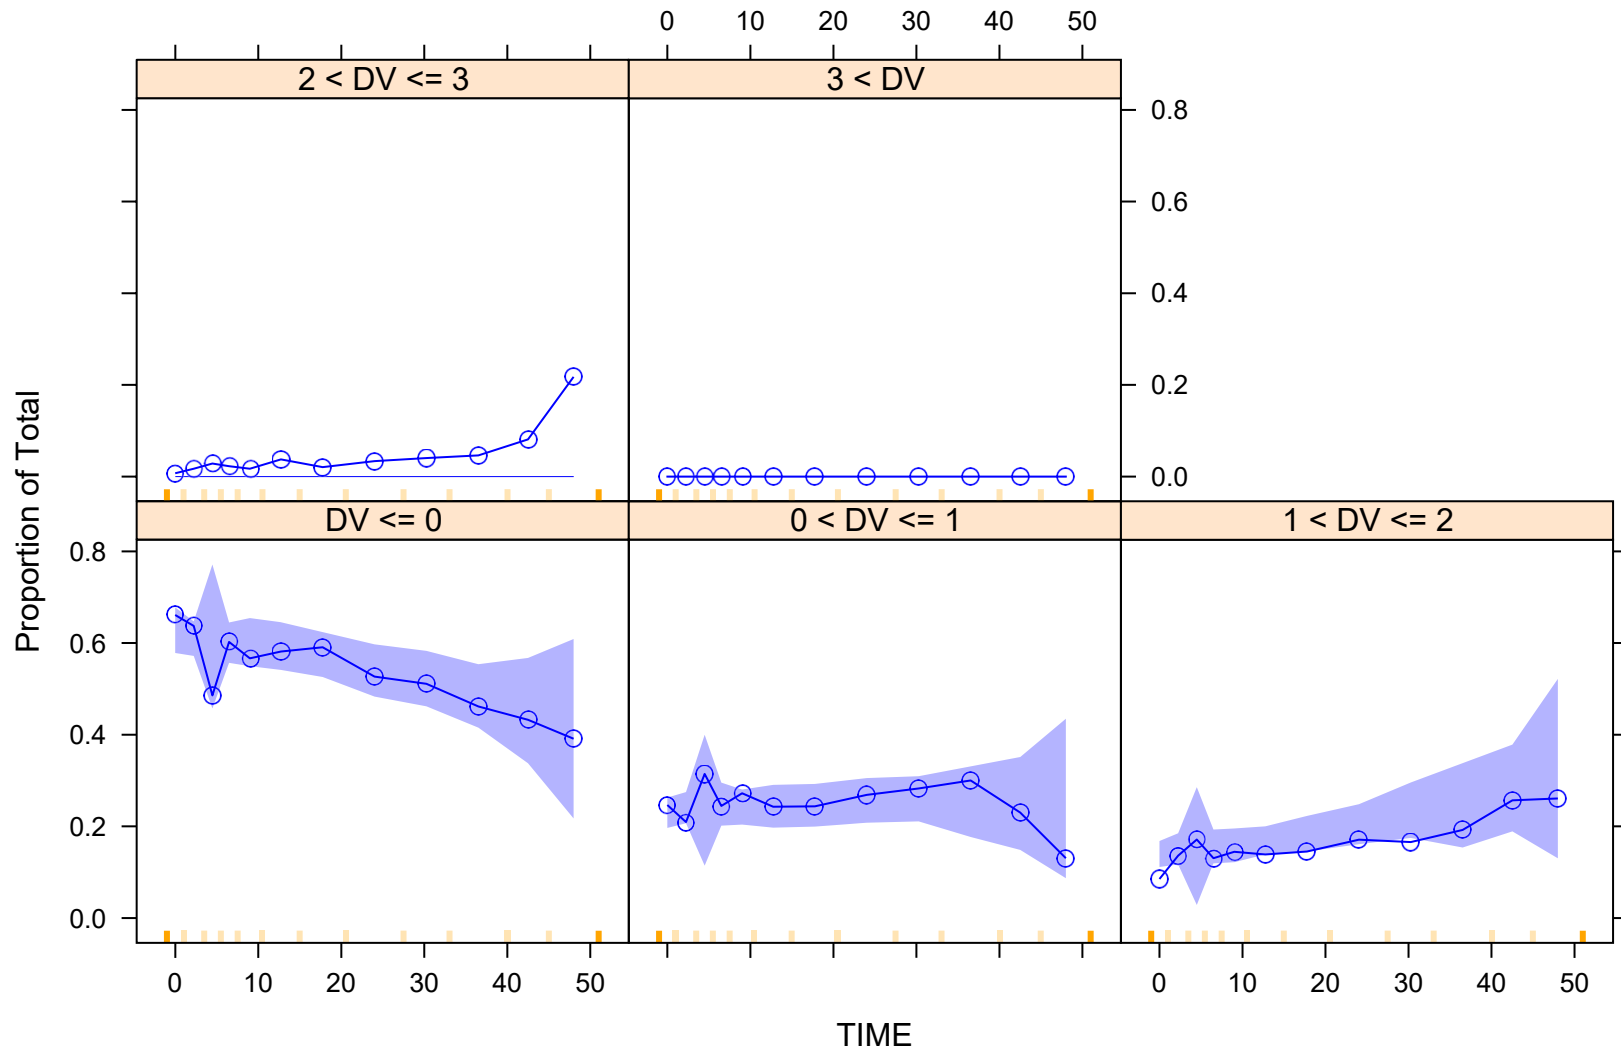

# ITEM == 15

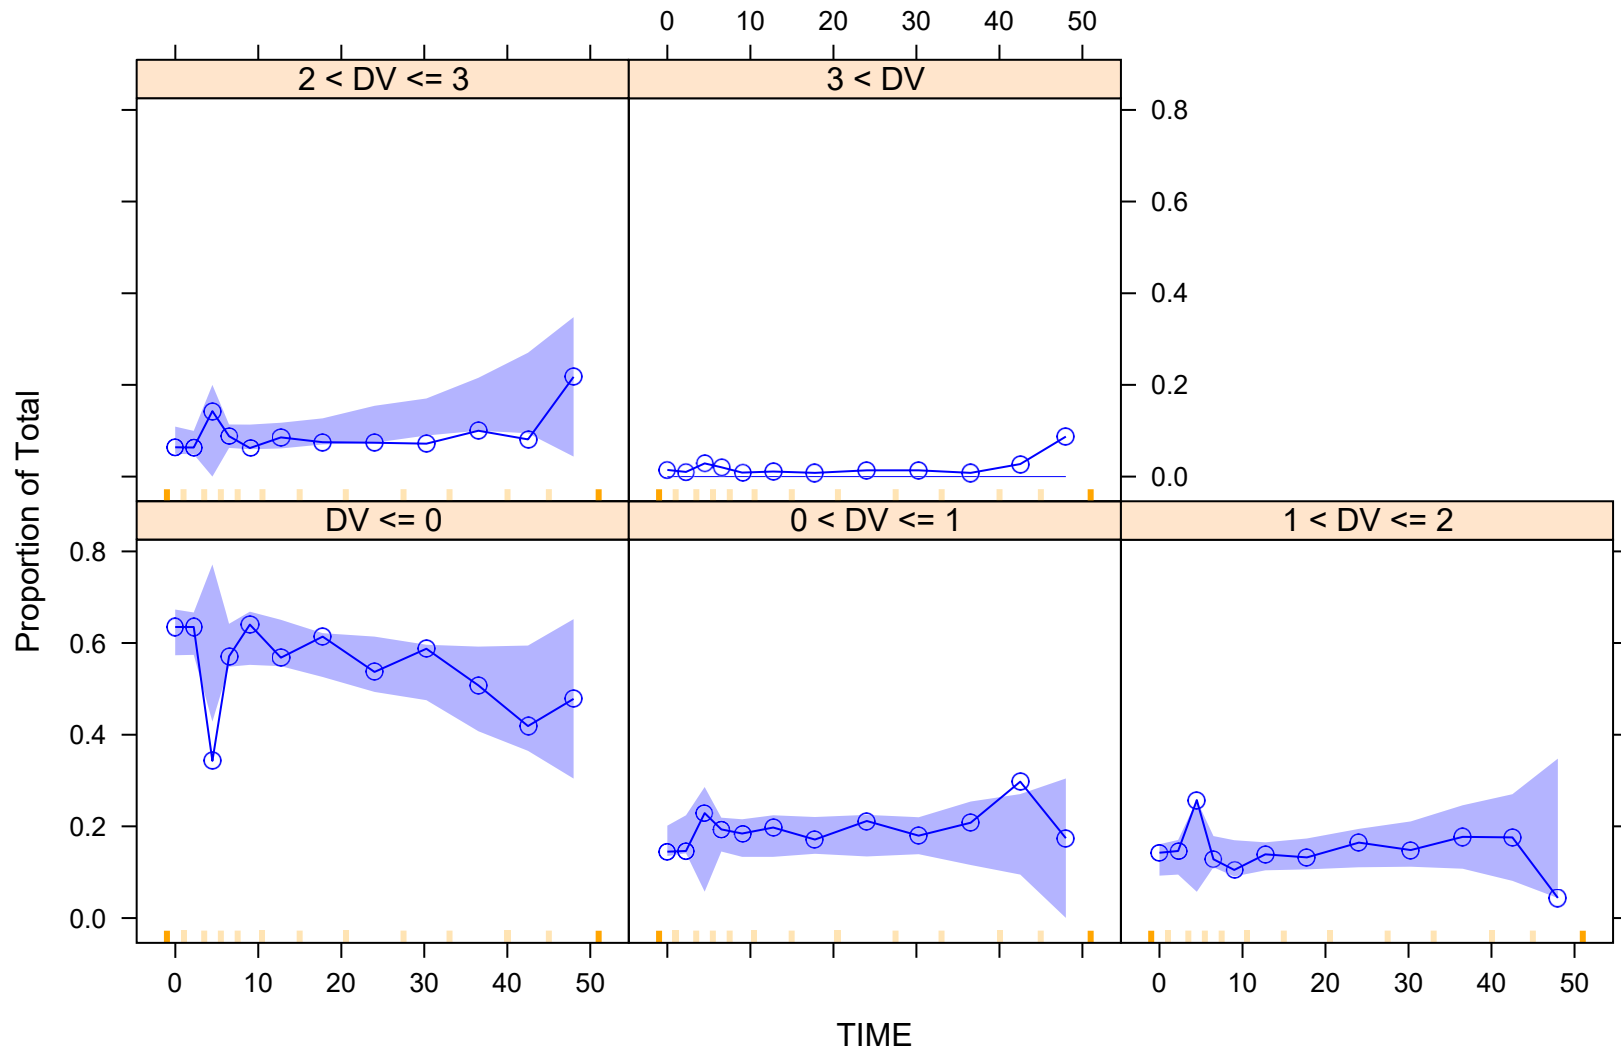

# ITEM == 16

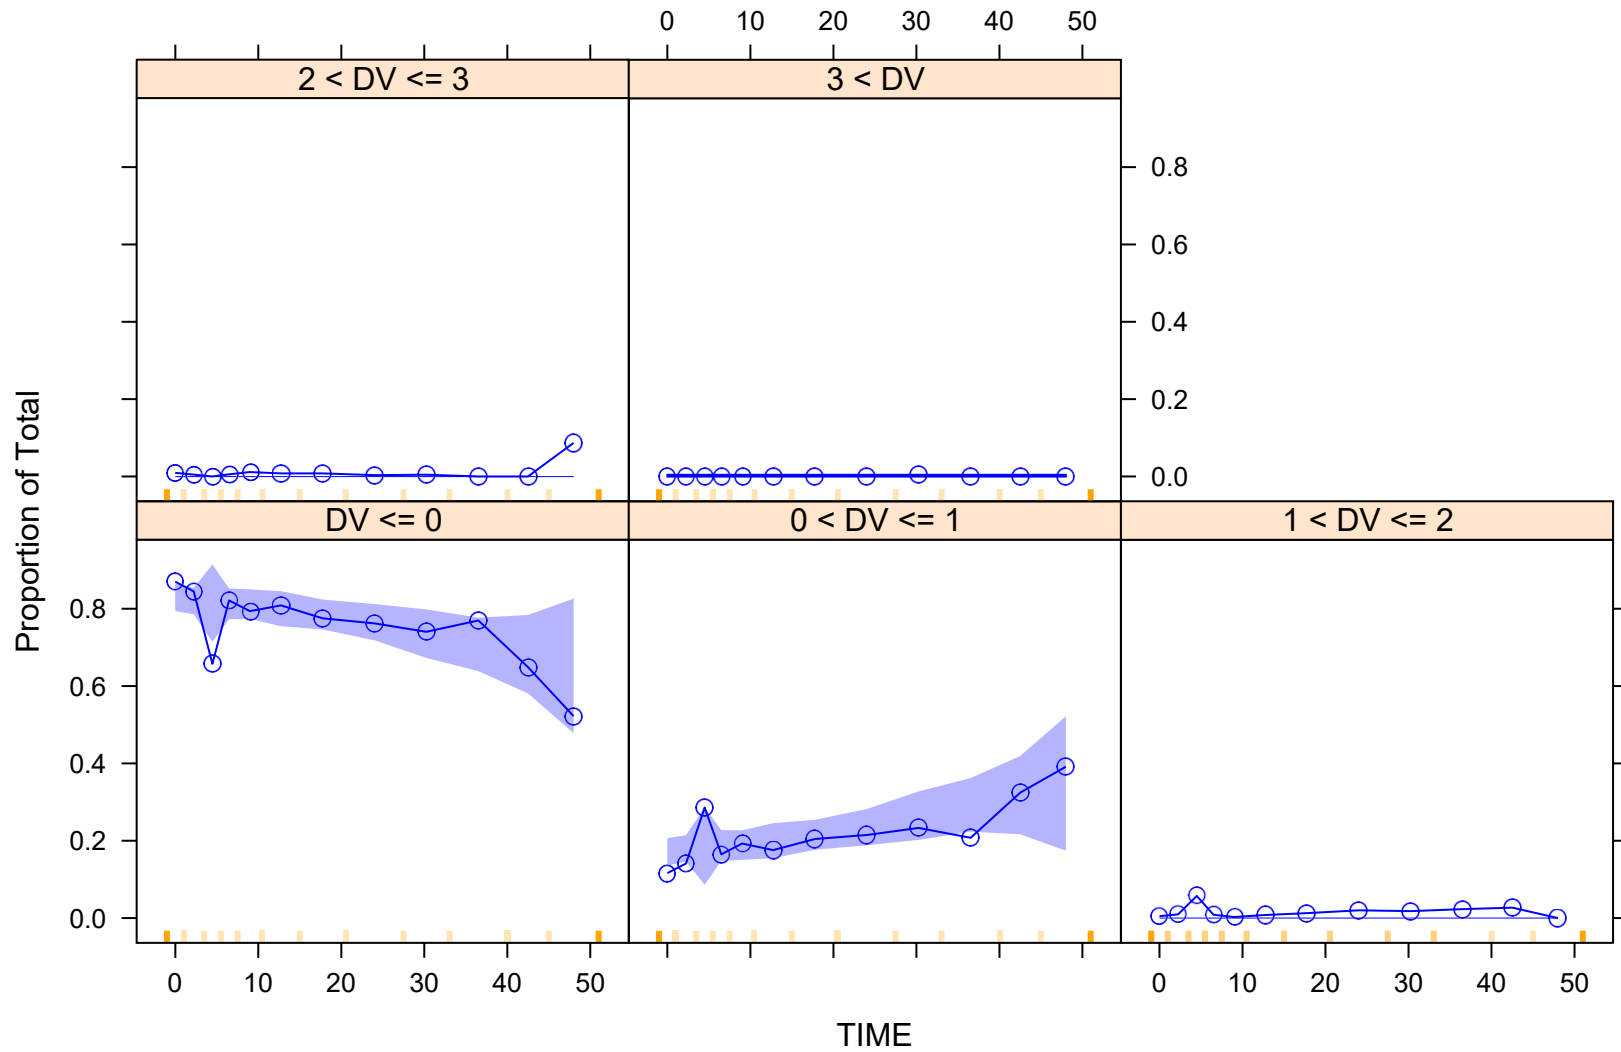

# ITEM == 17

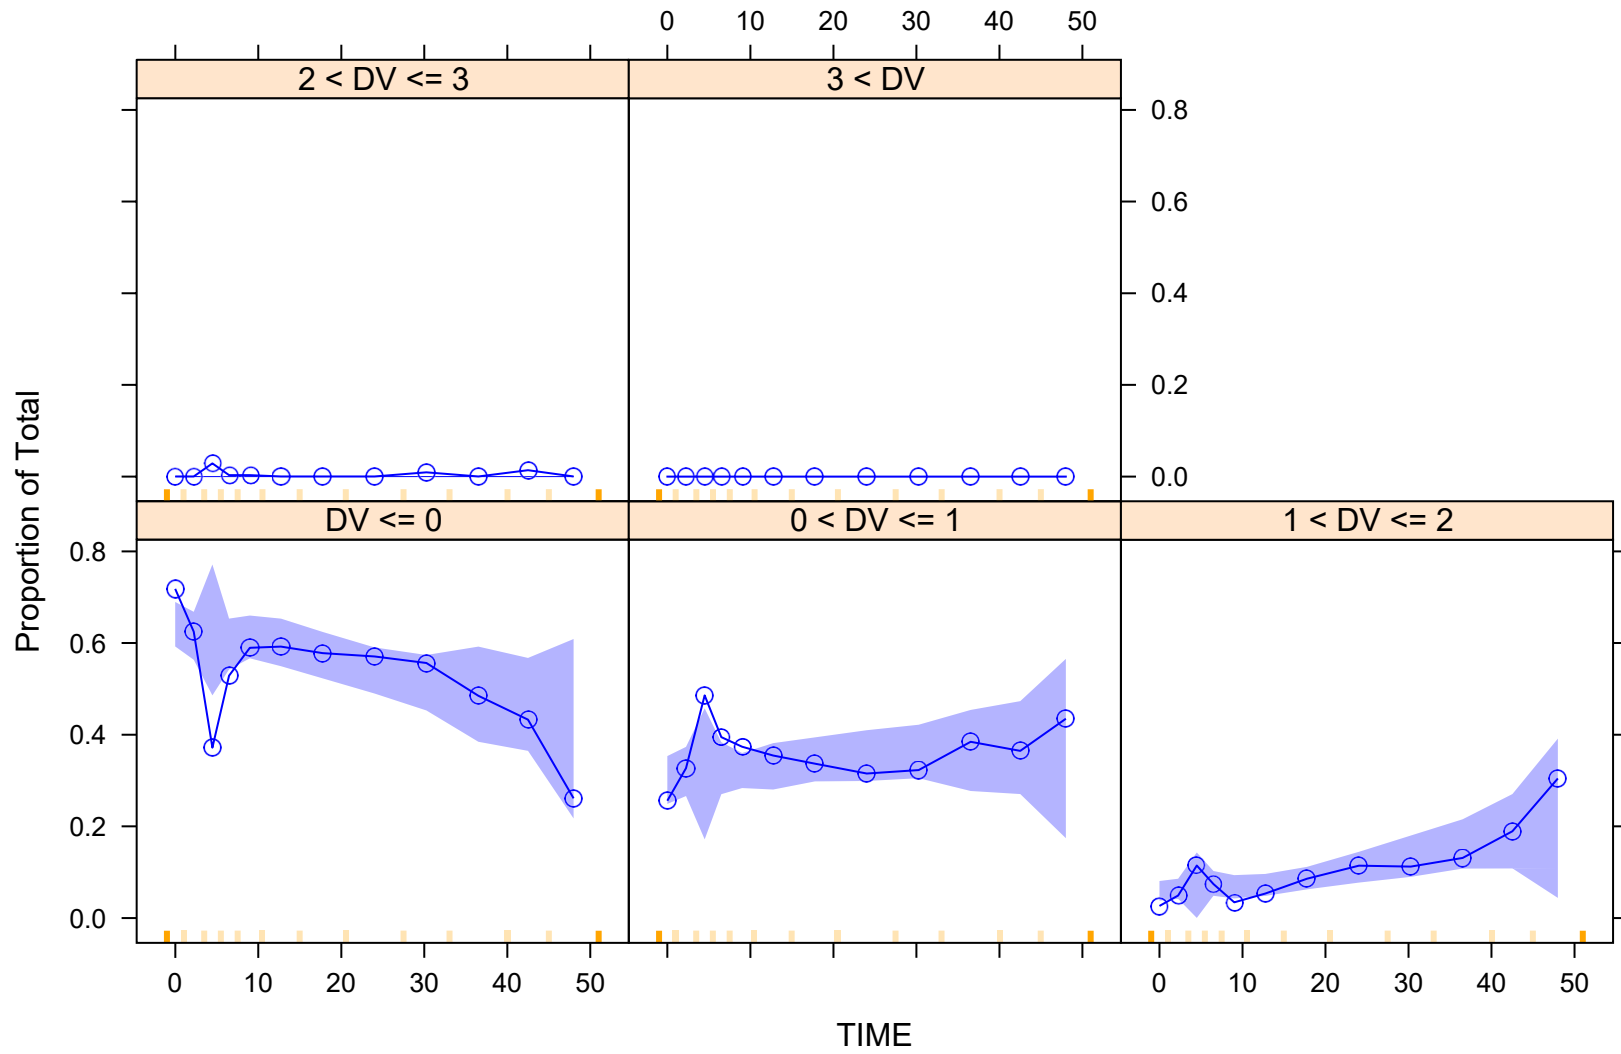

# ITEM == 18

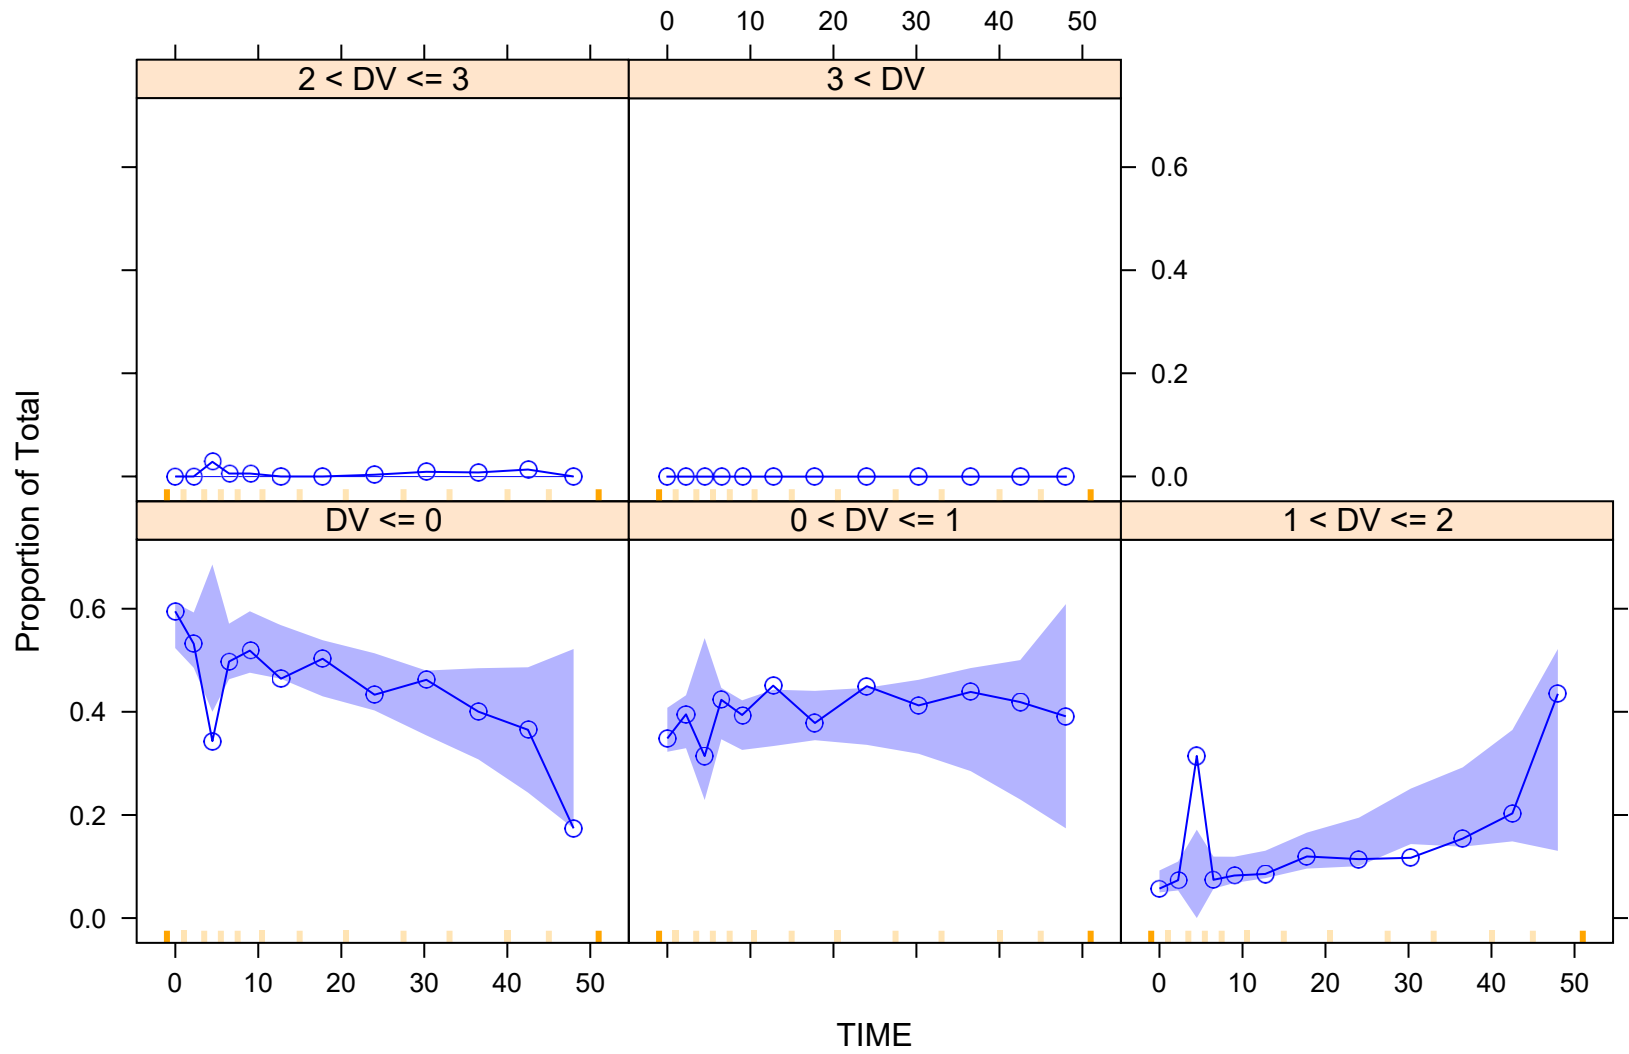

# ITEM == 19

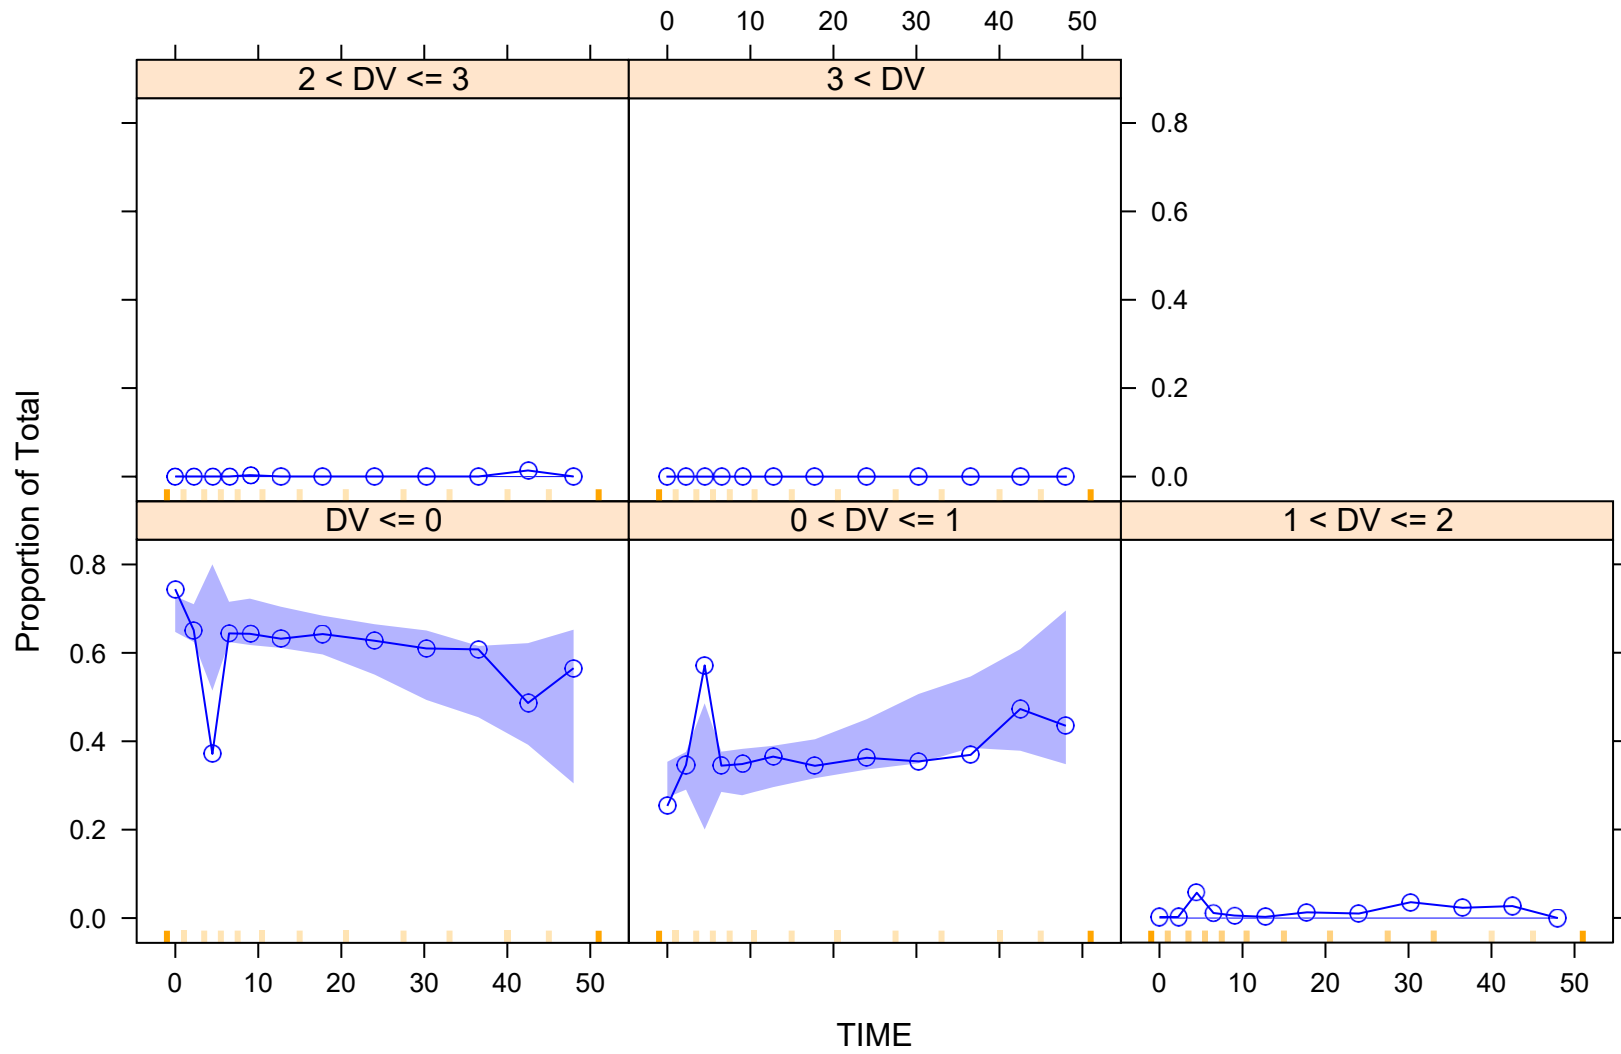



# ITEM == 20

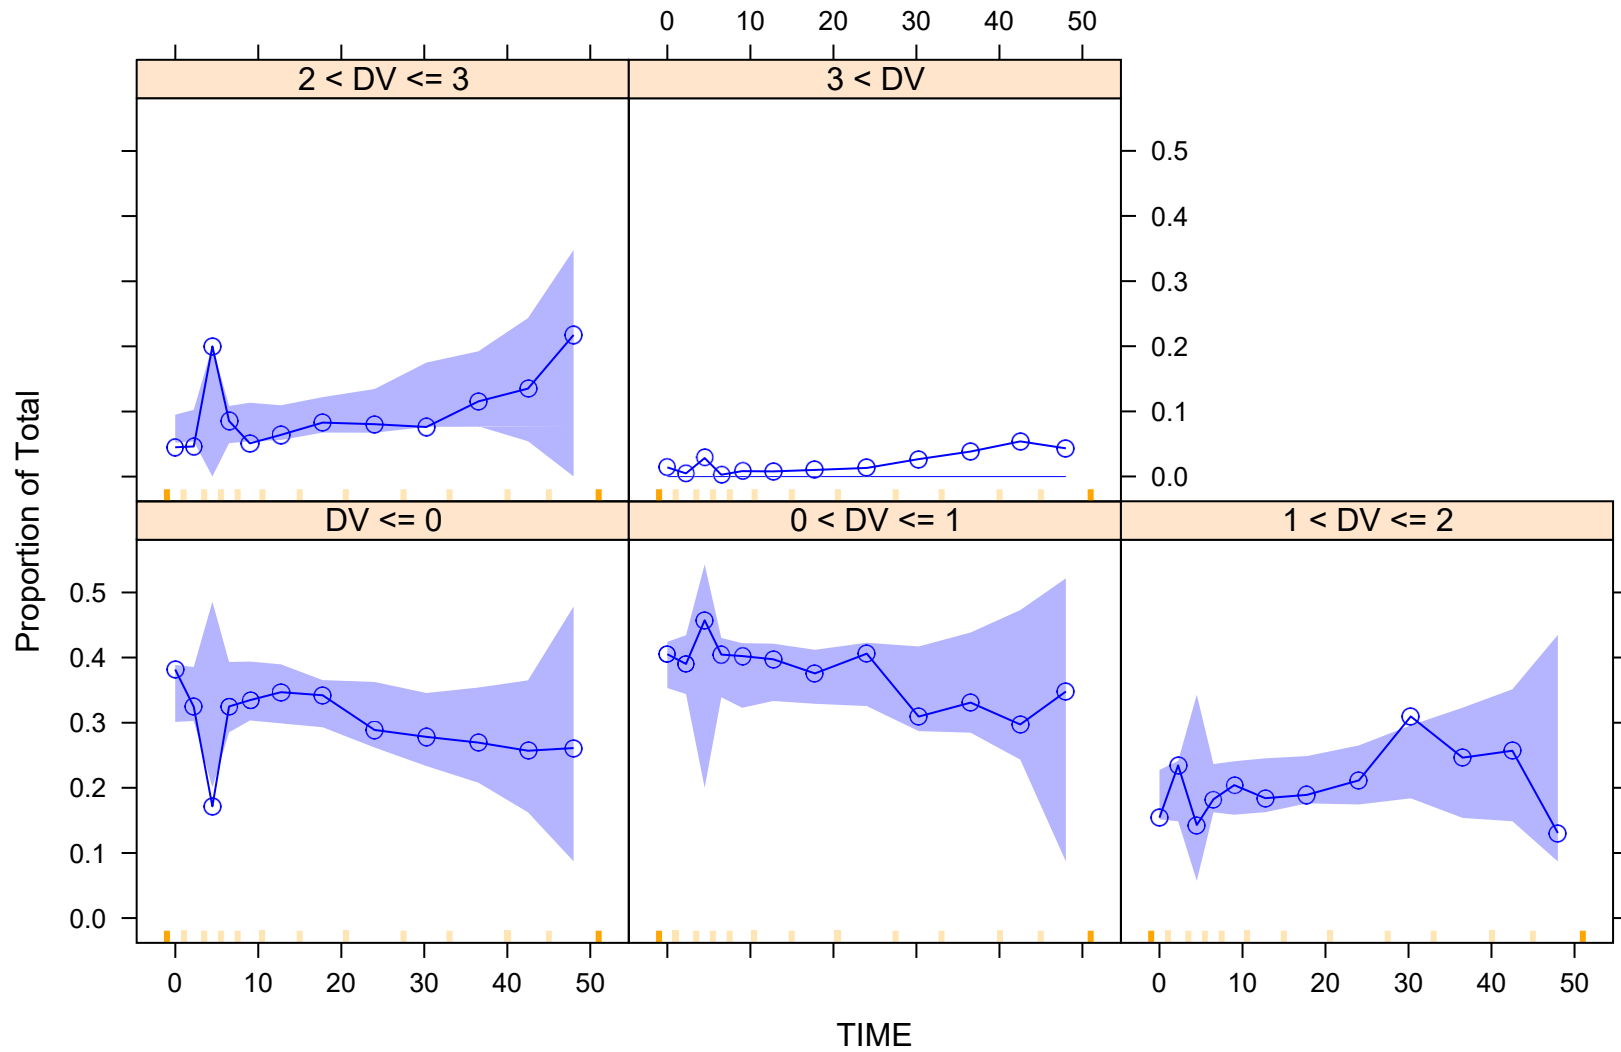

# ITEM == 21

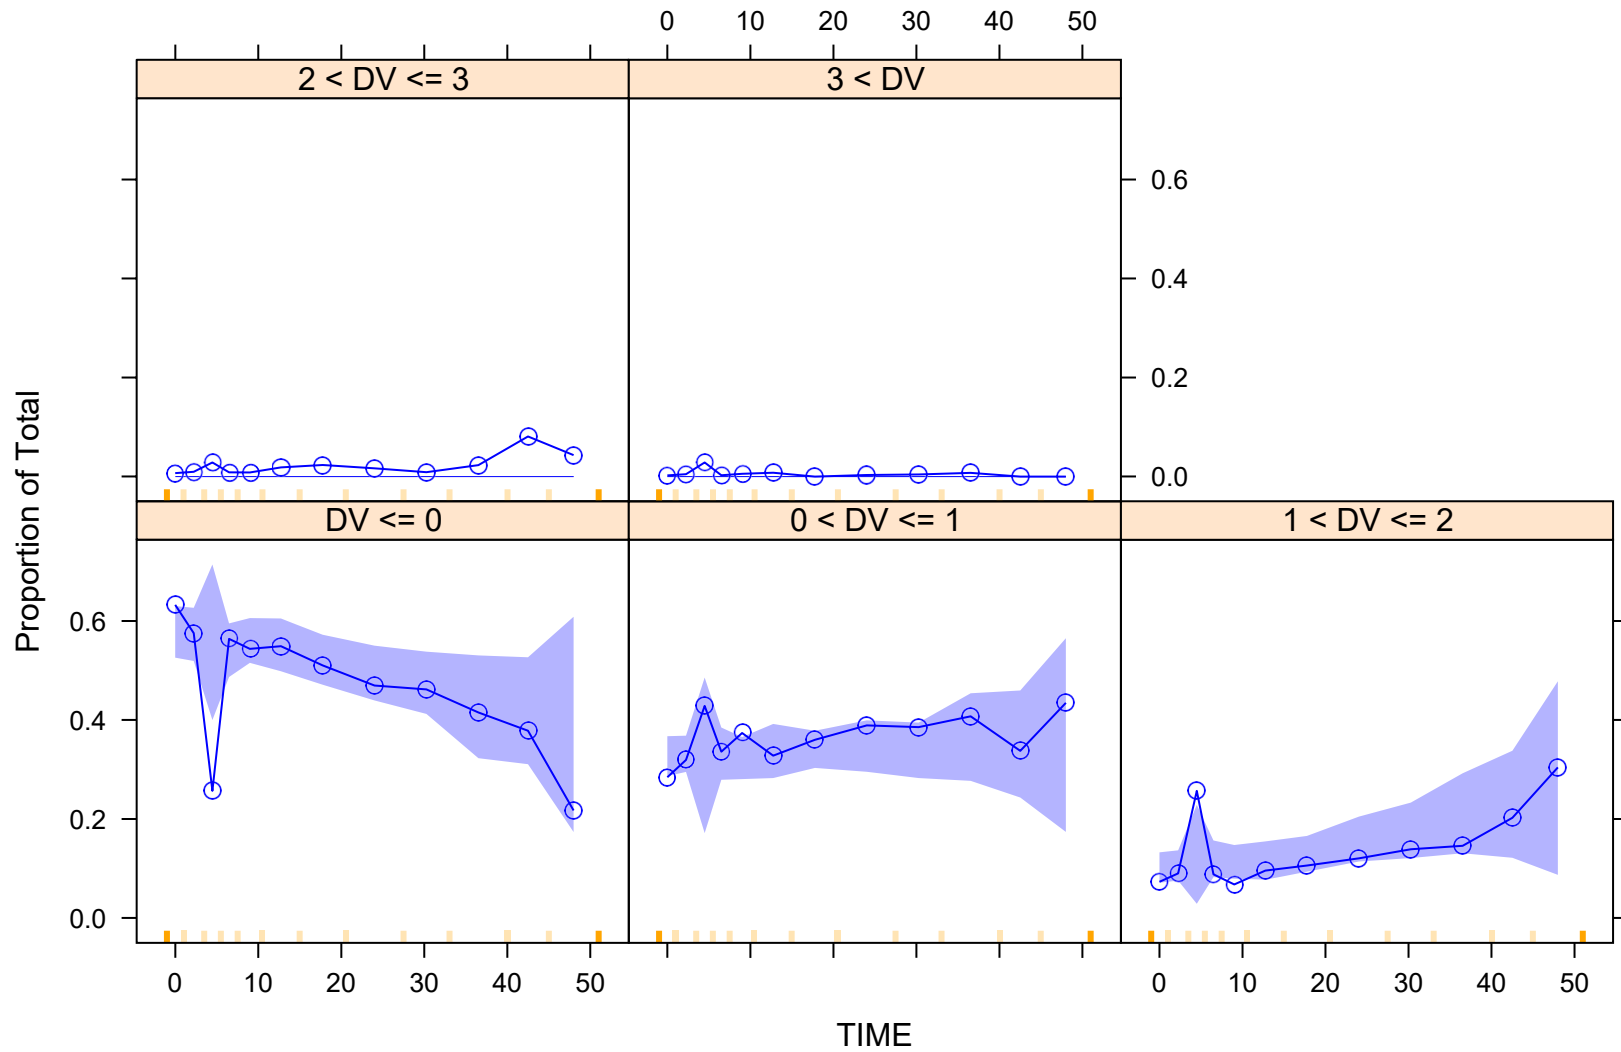

# ITEM == 22

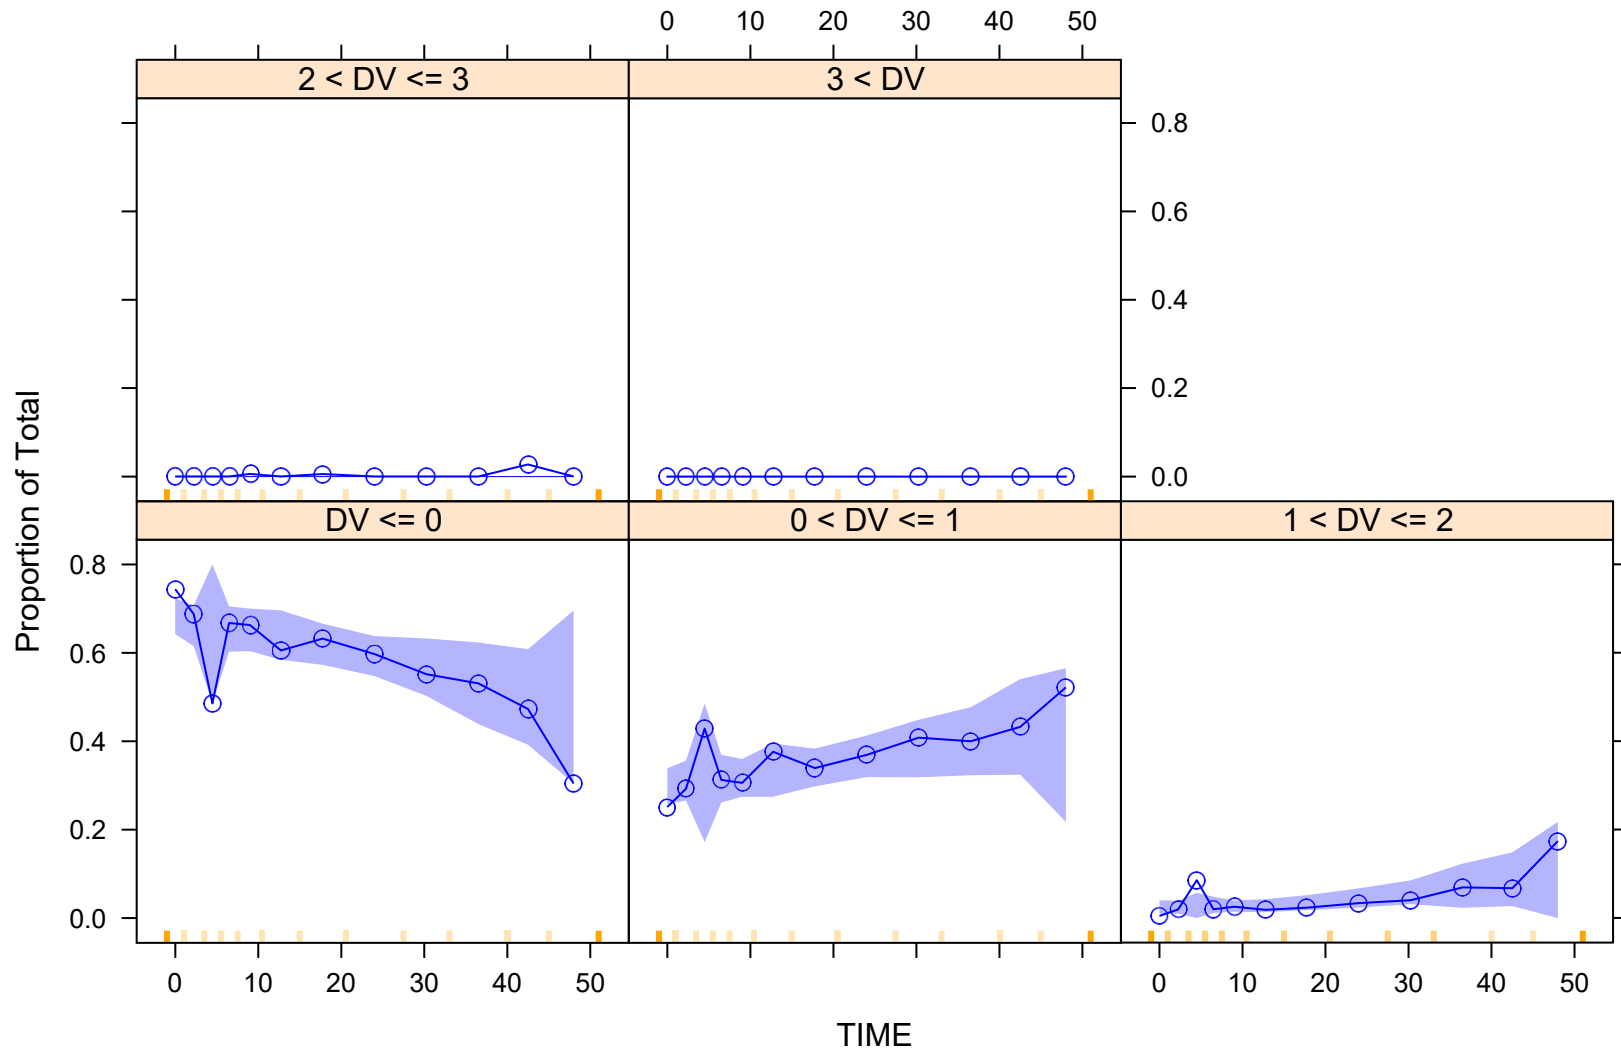

# ITEM == 24

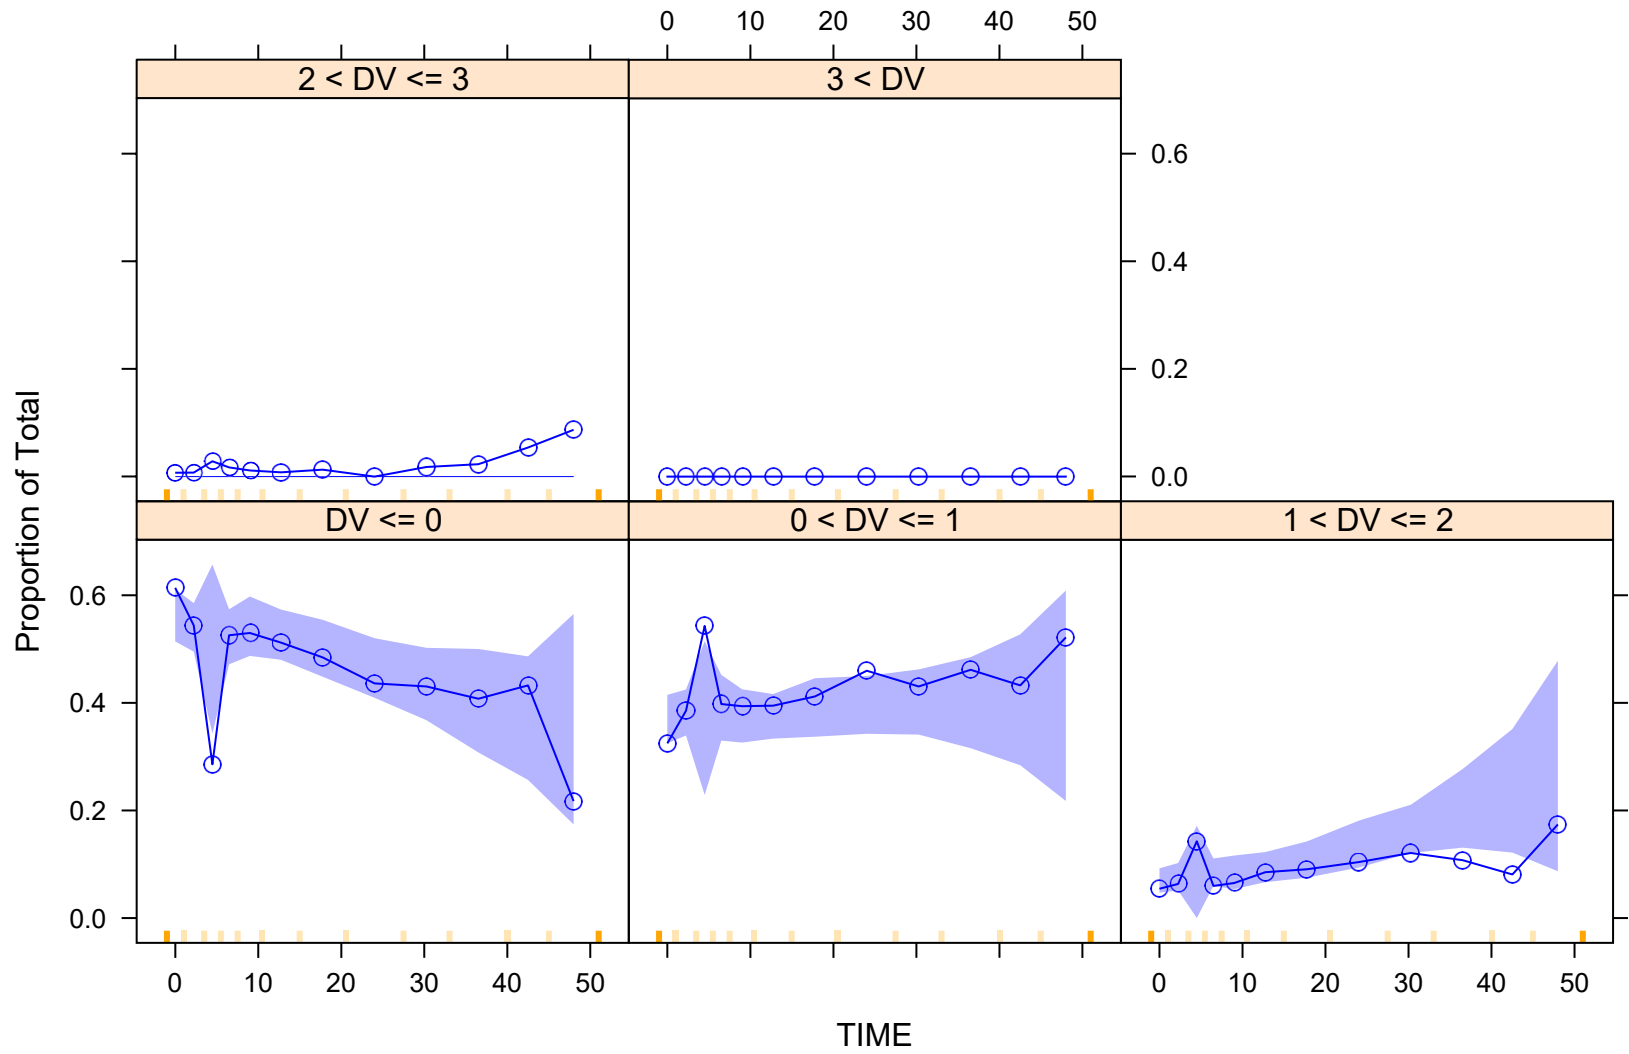

# ITEM == 25

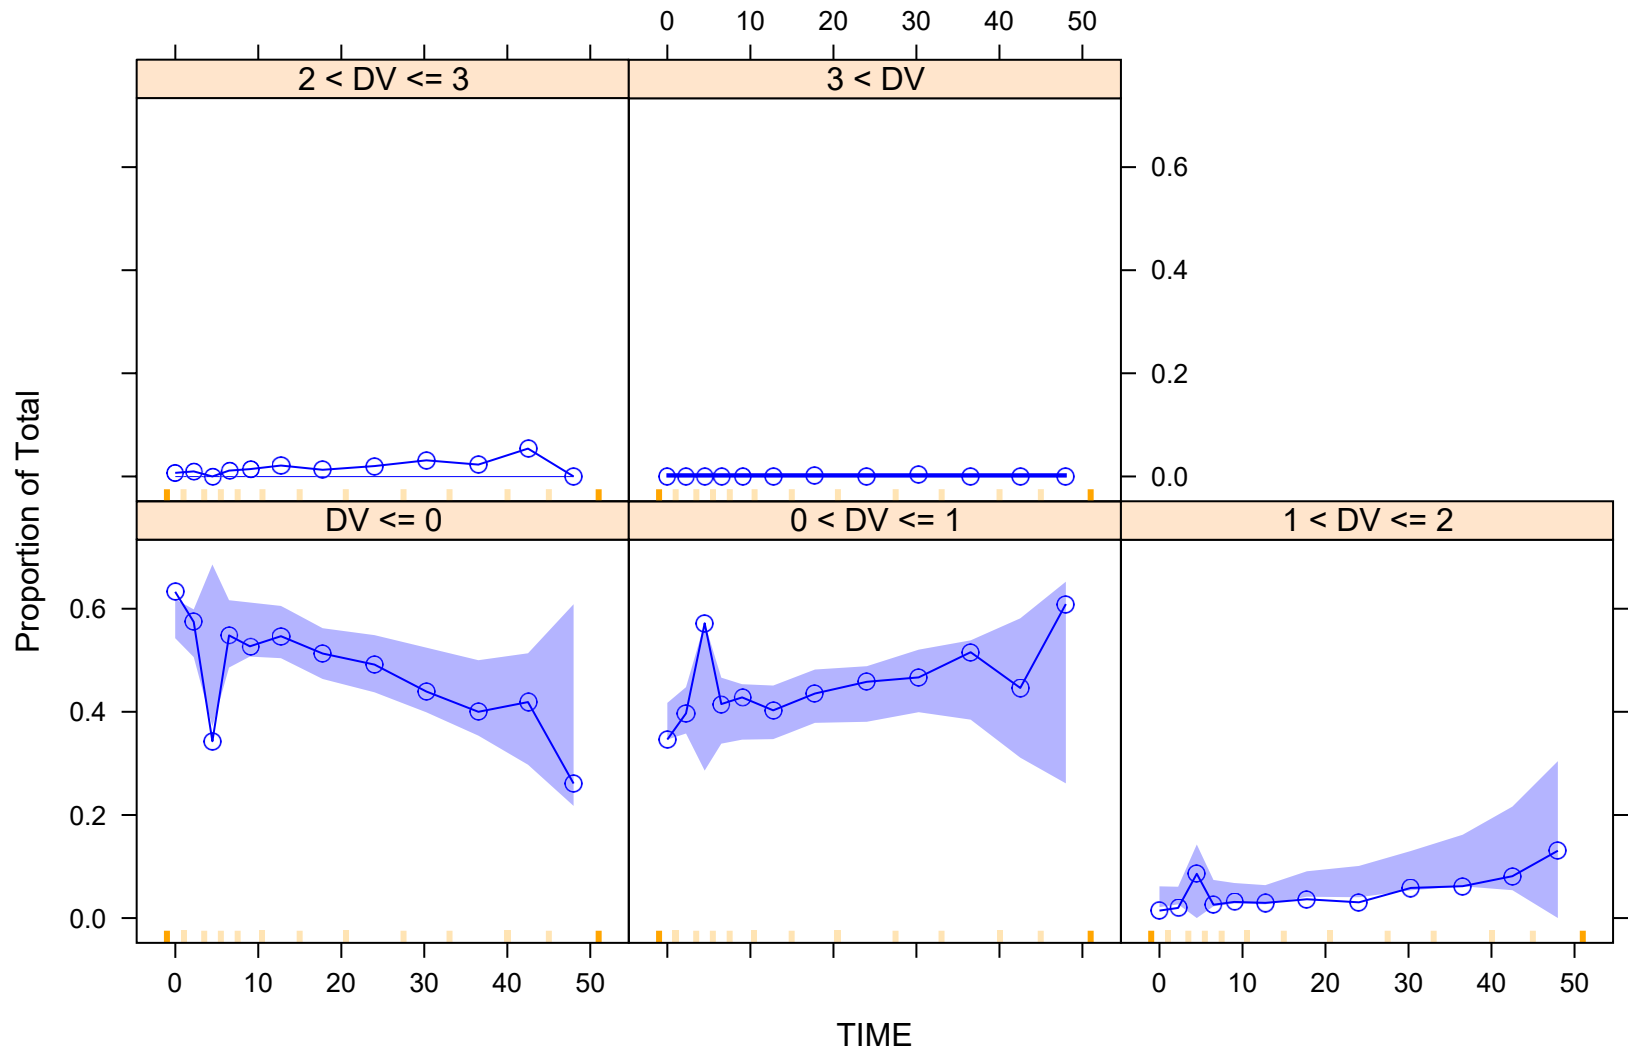

# ITEM == 26

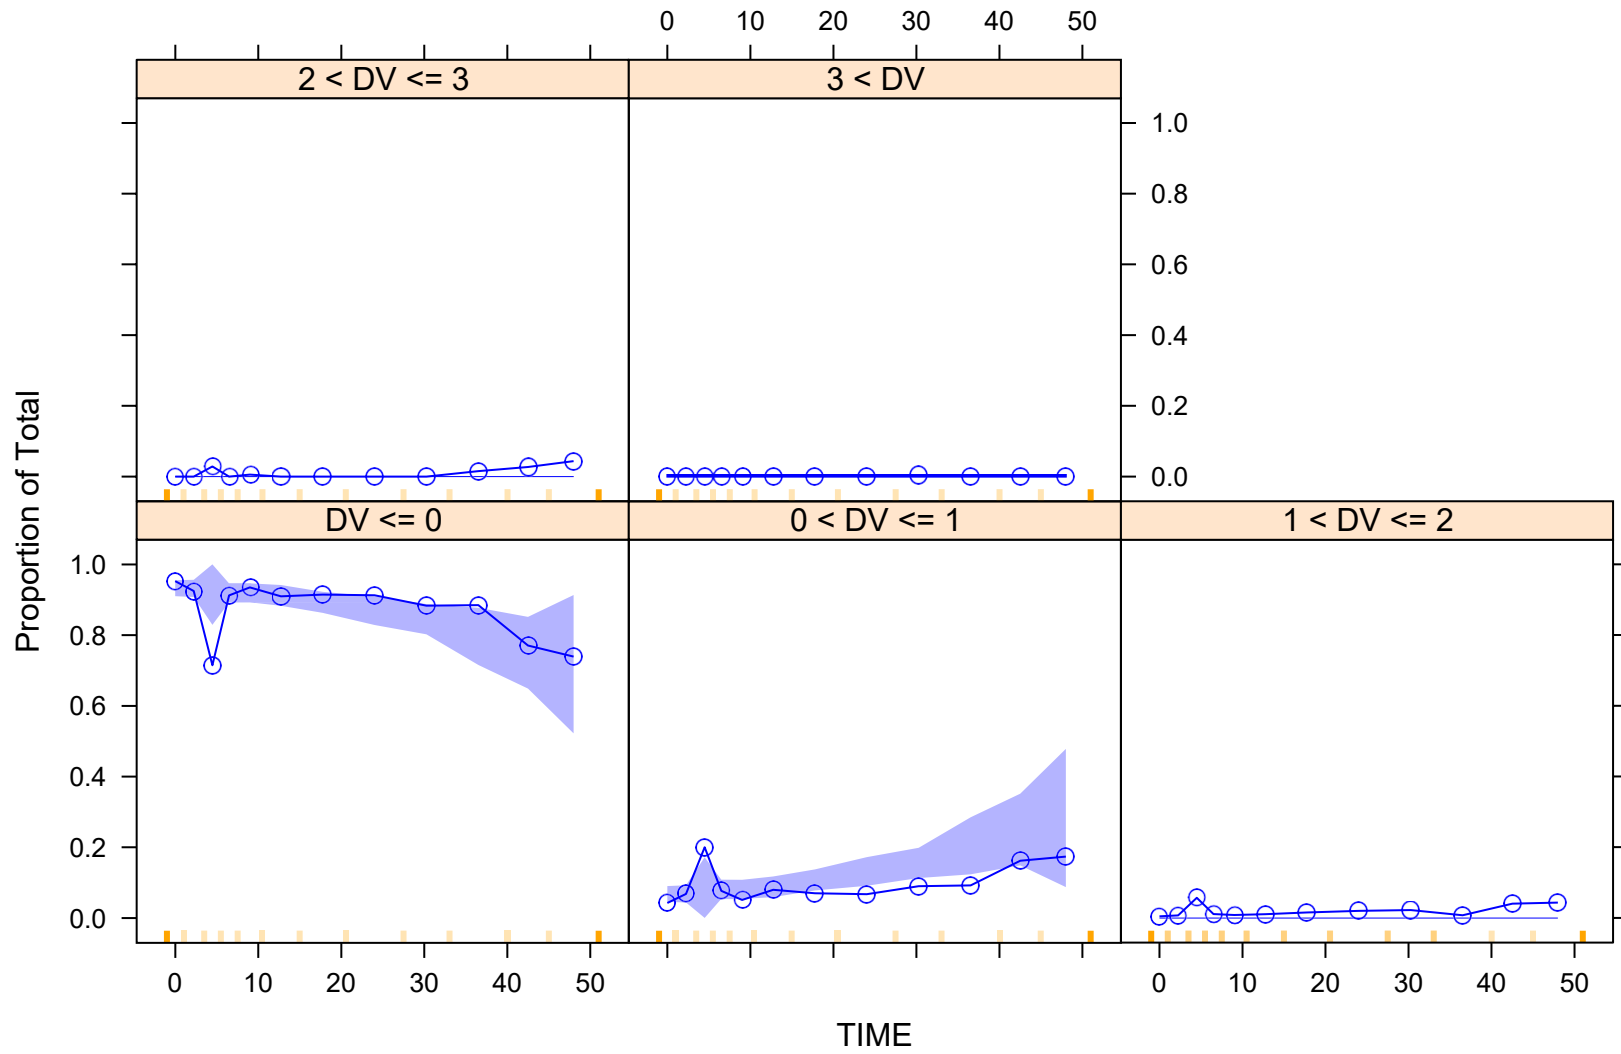

(IRMmotor\_drugeffect4b\_model-1.mod)  
ITEM == 27

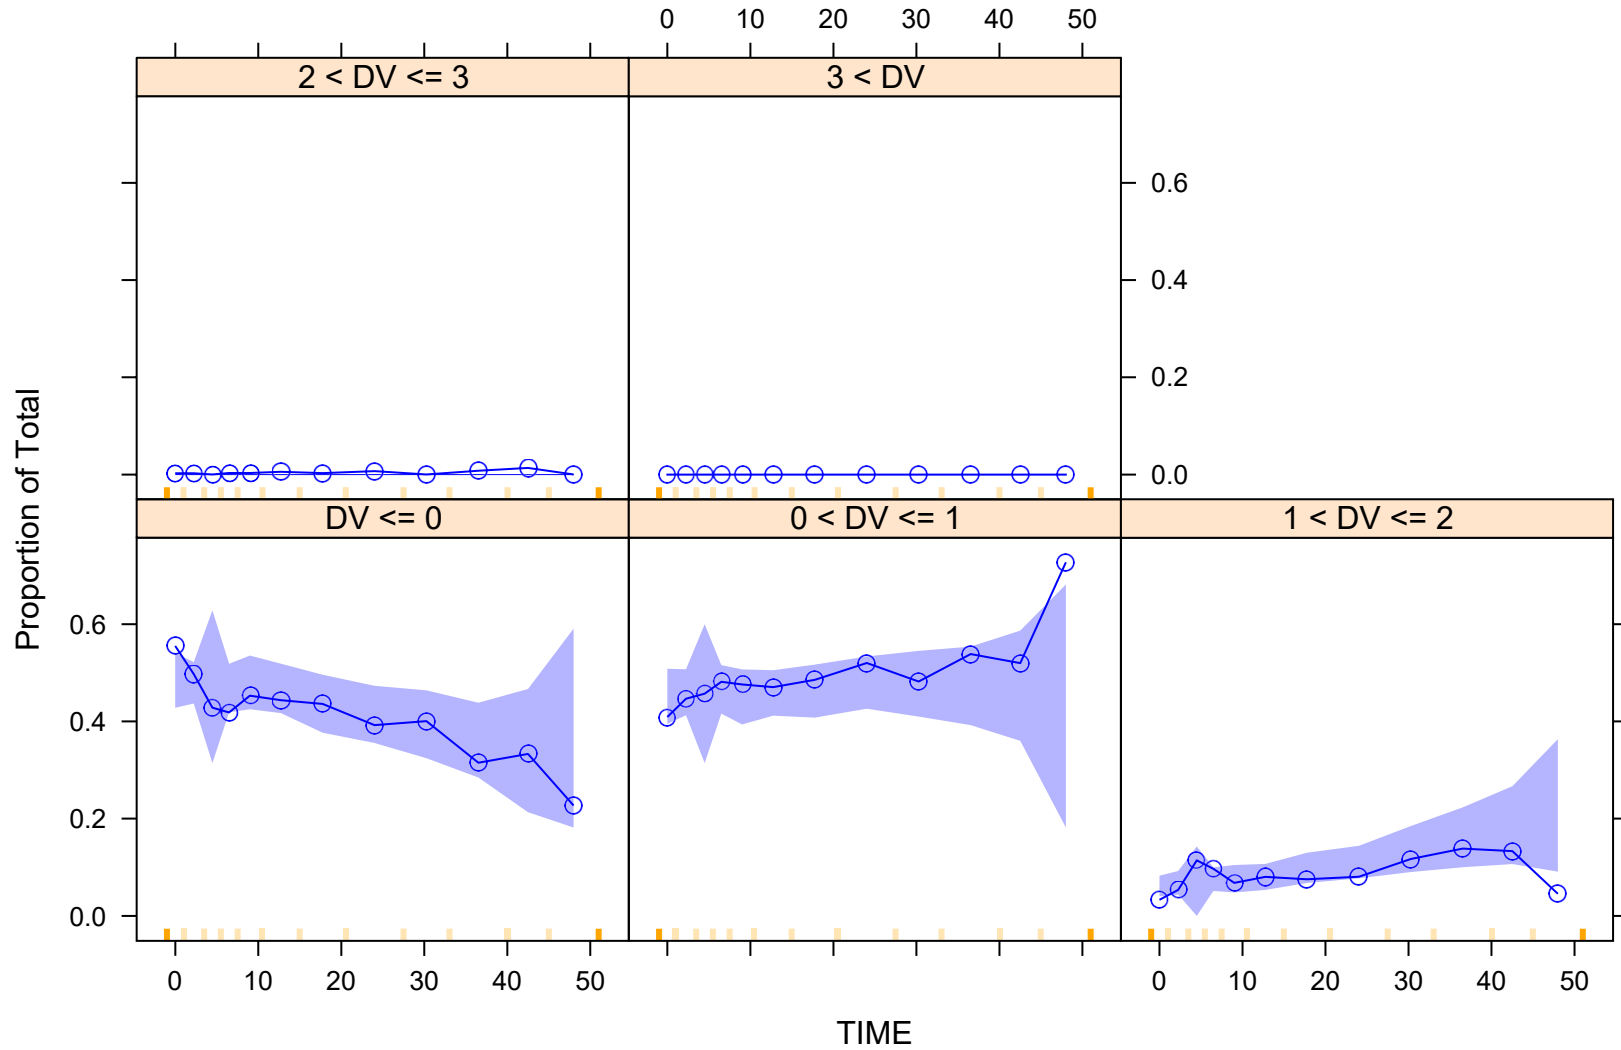

# ITEM == 28

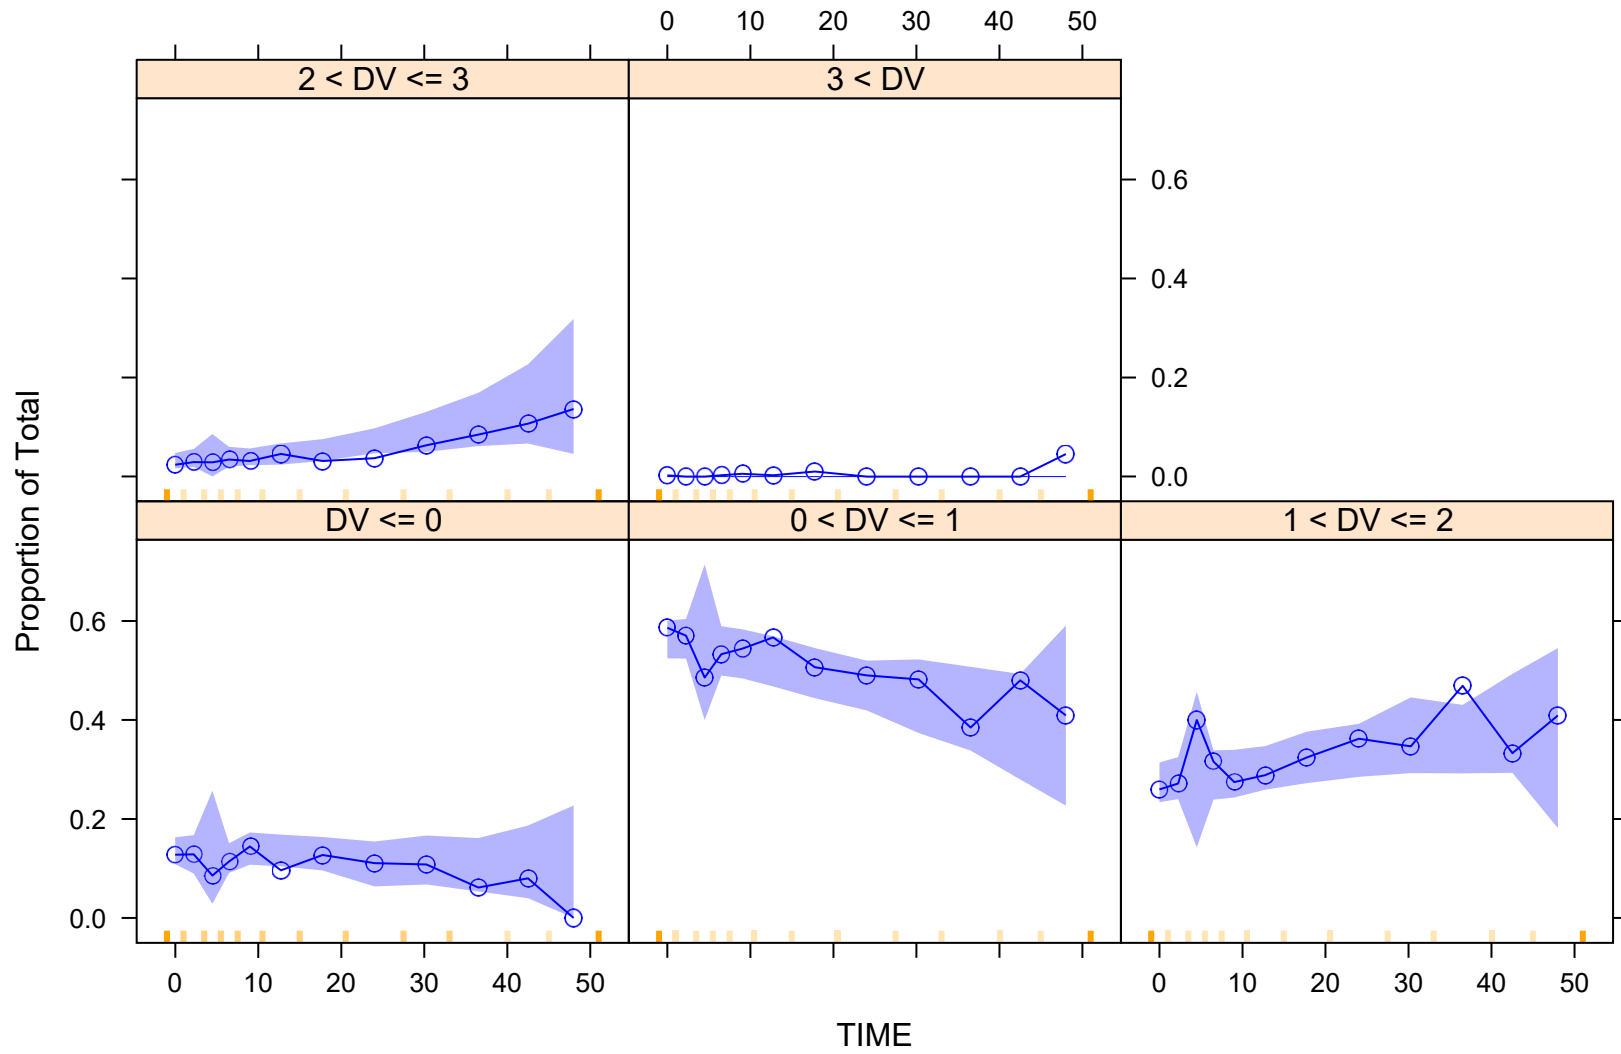



# ITEM == 29

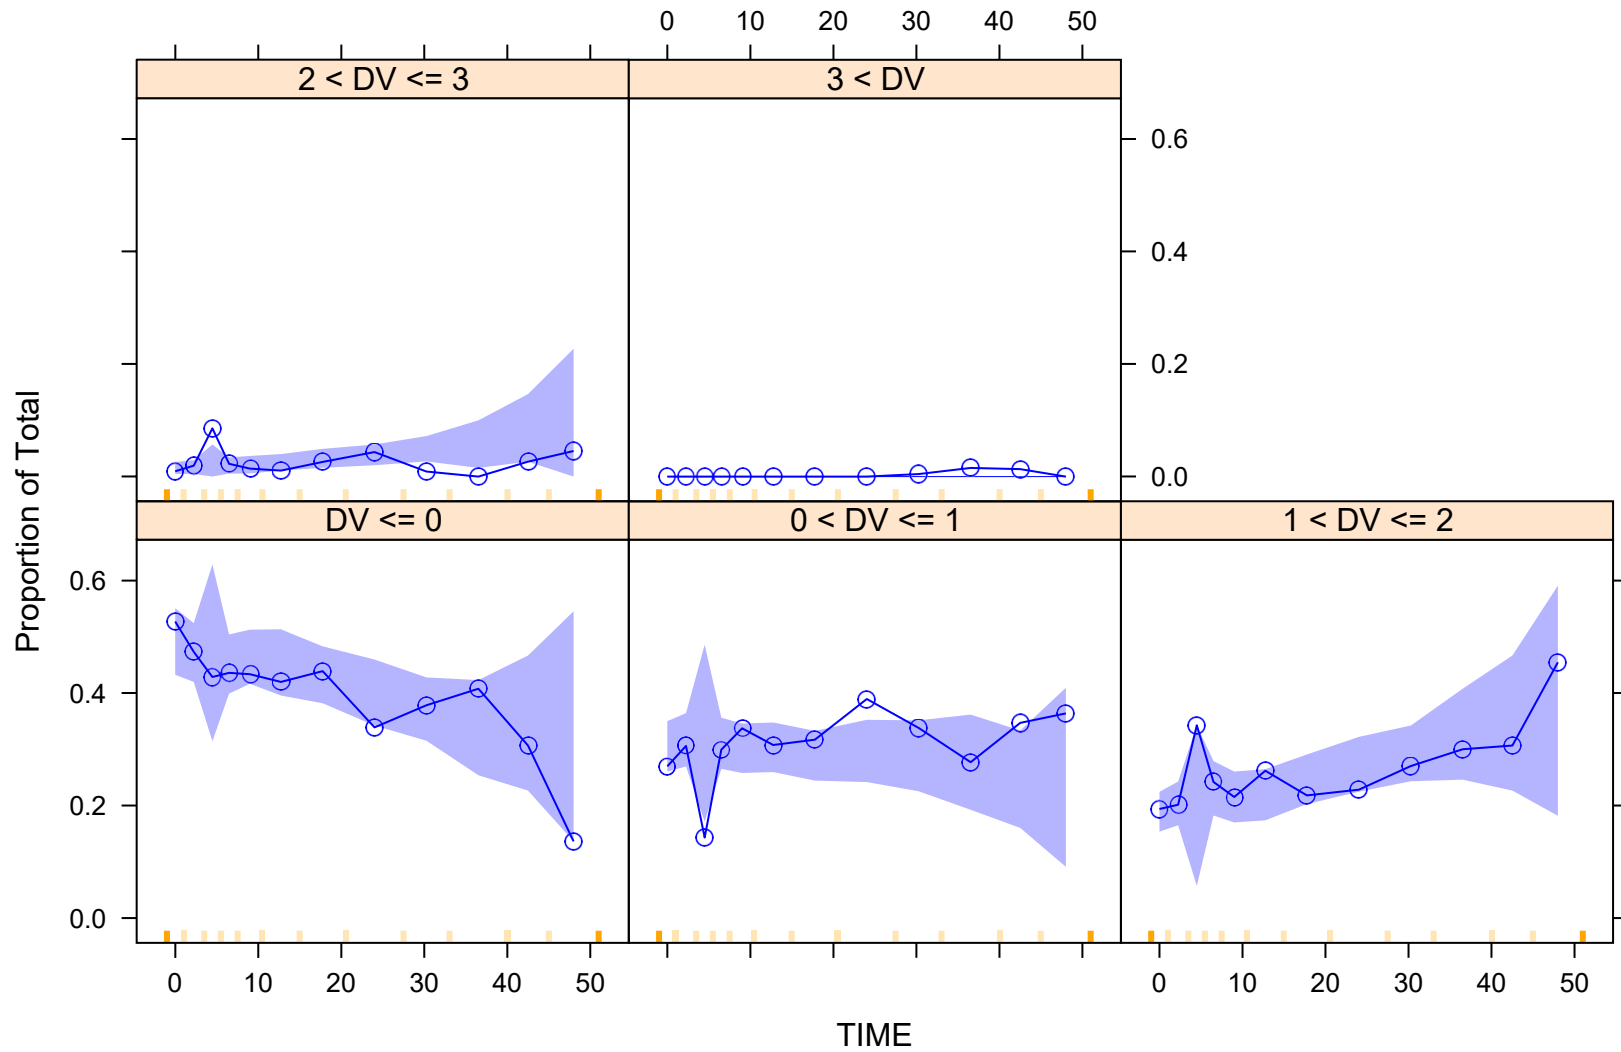

ITEM == 30

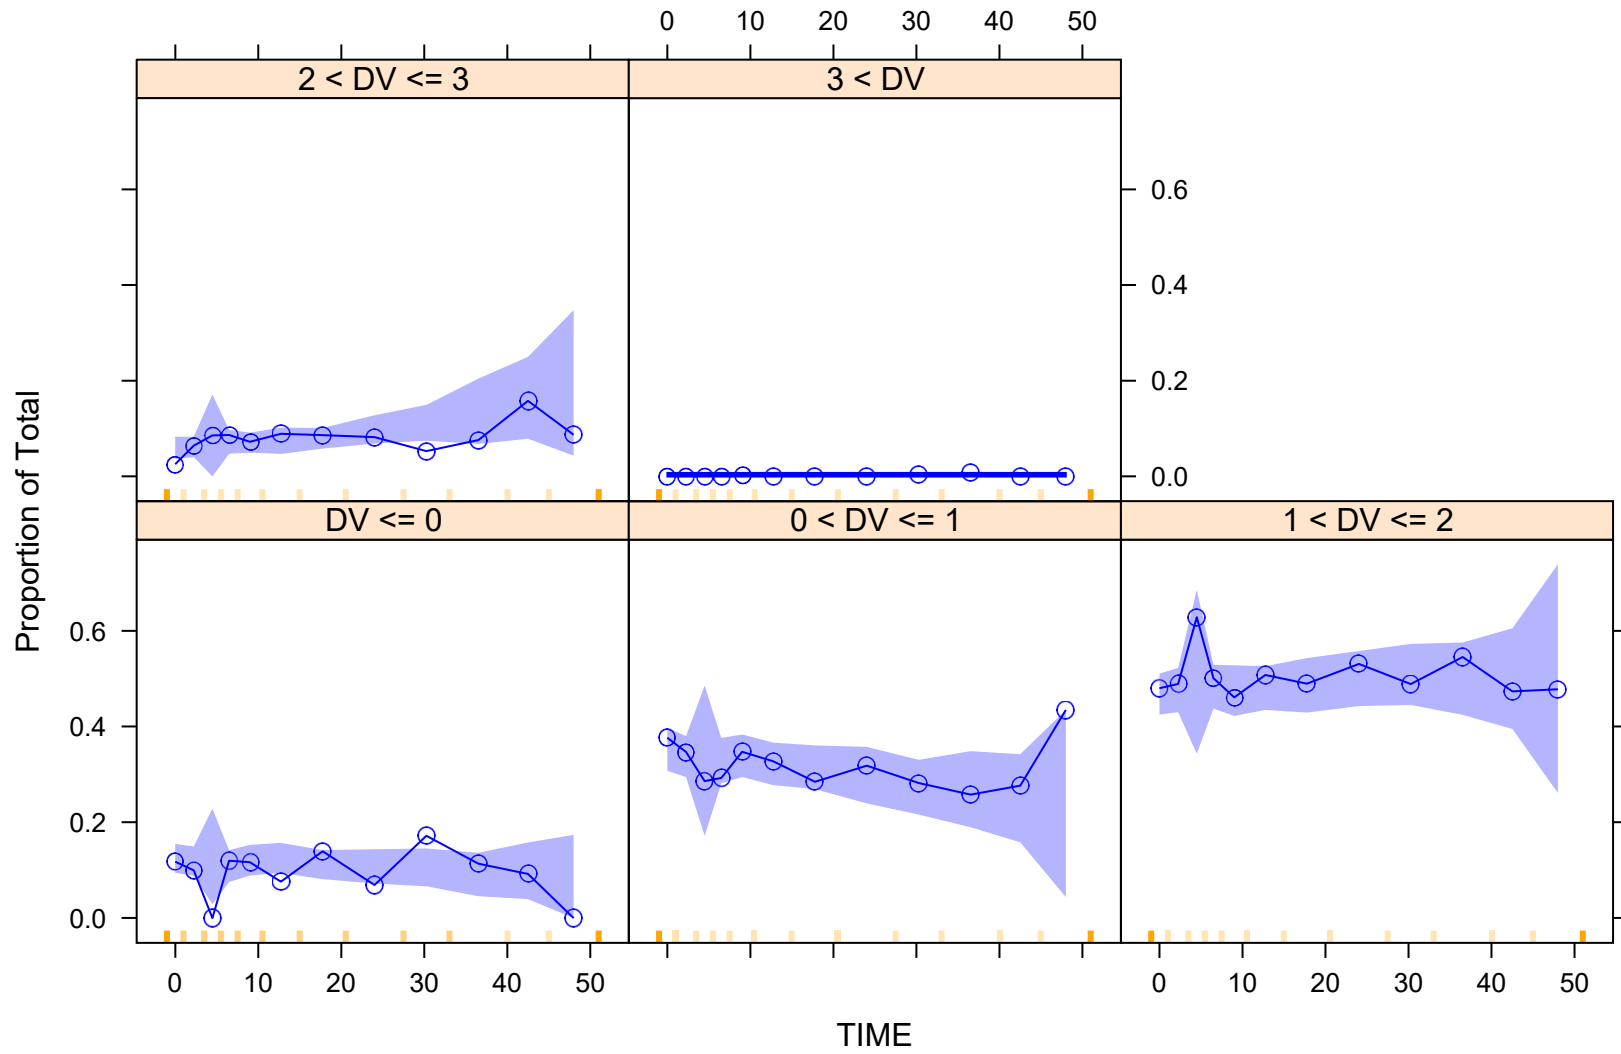

# ITEM == 31

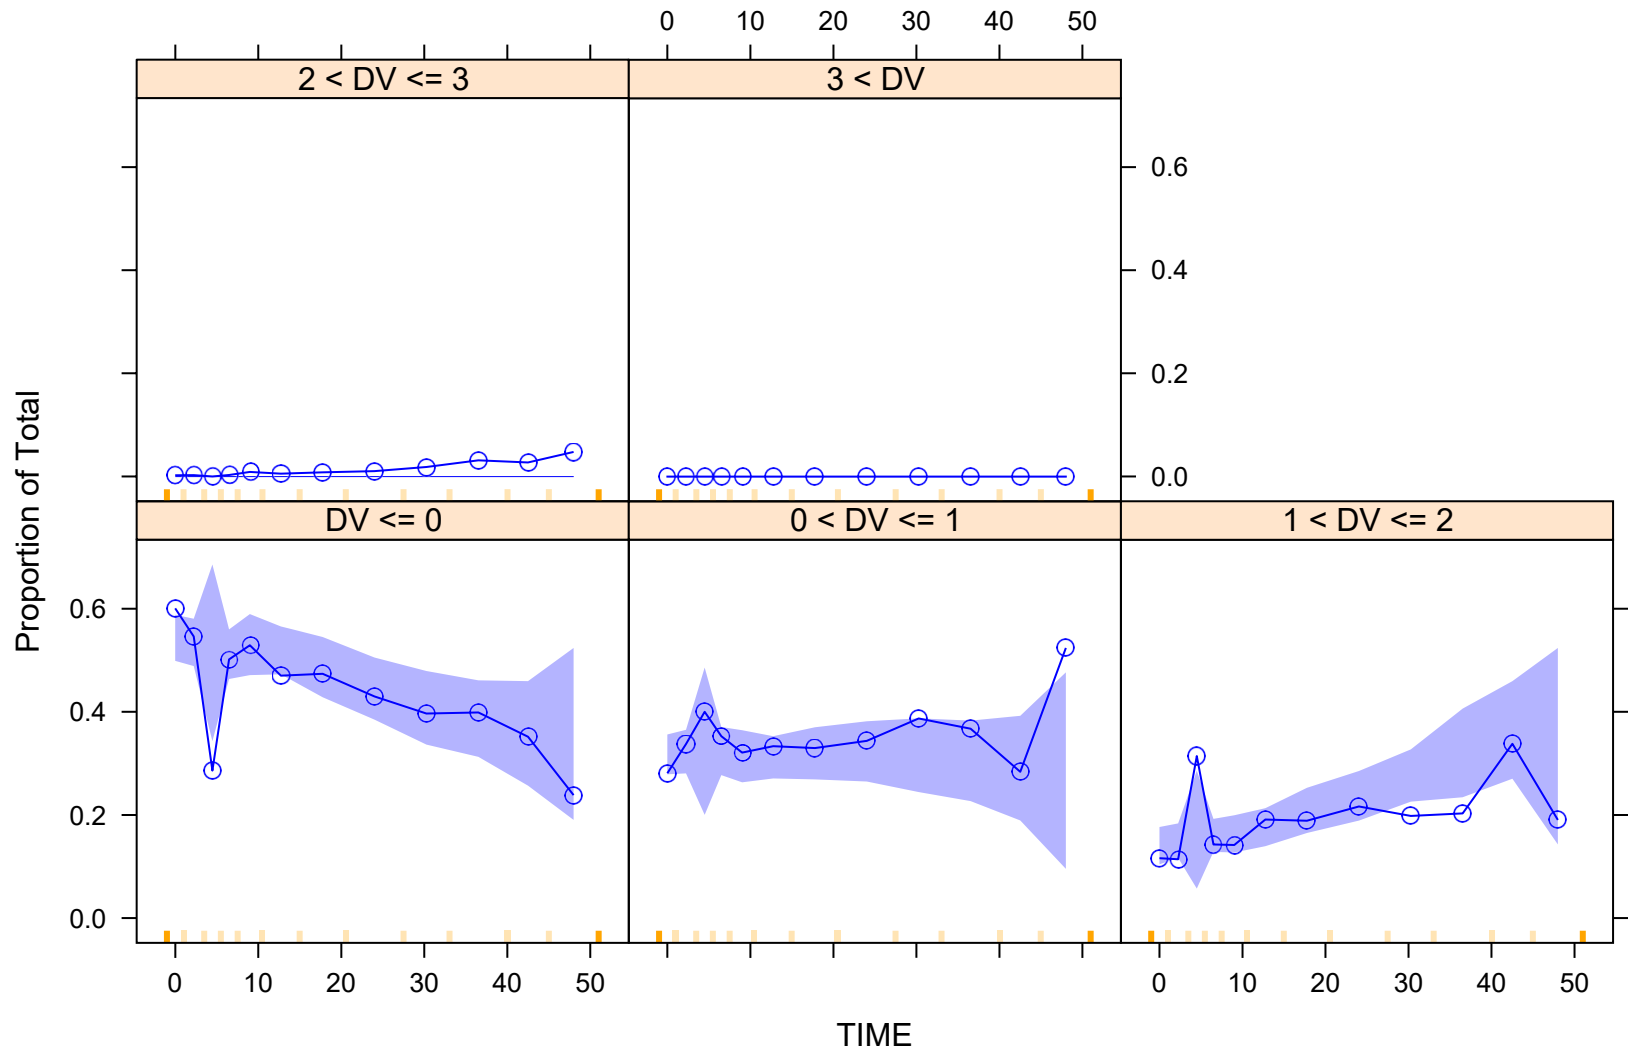

# ITEM == 32

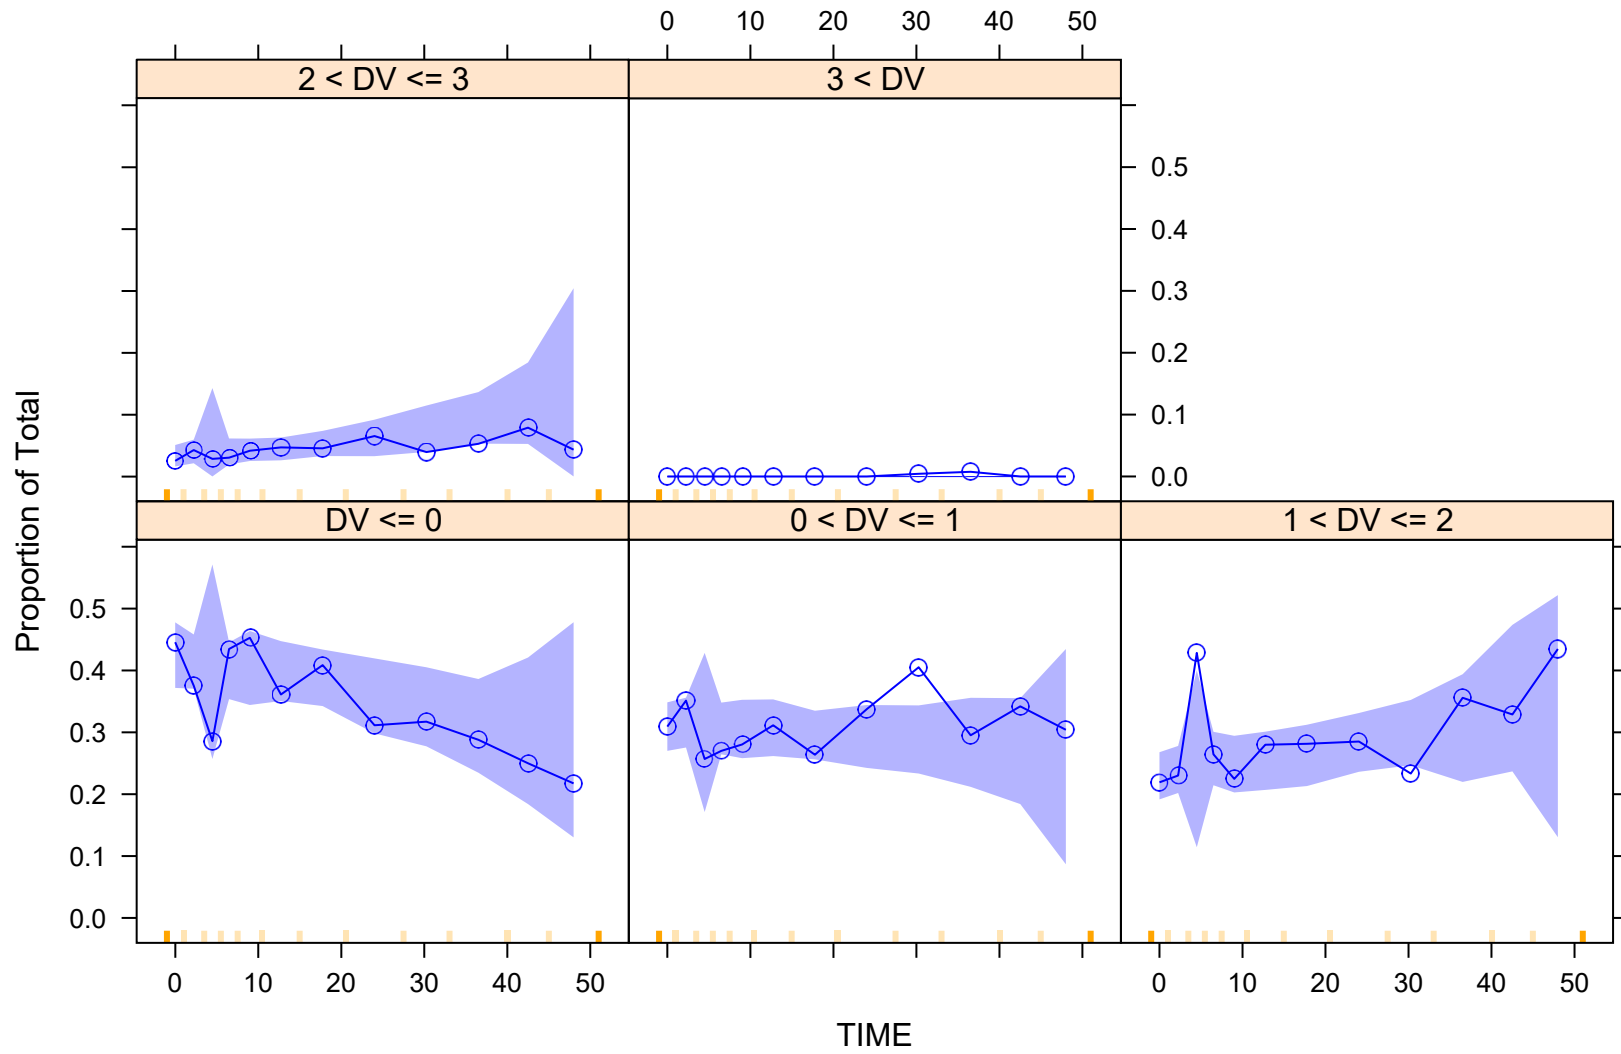

# ITEM == 33

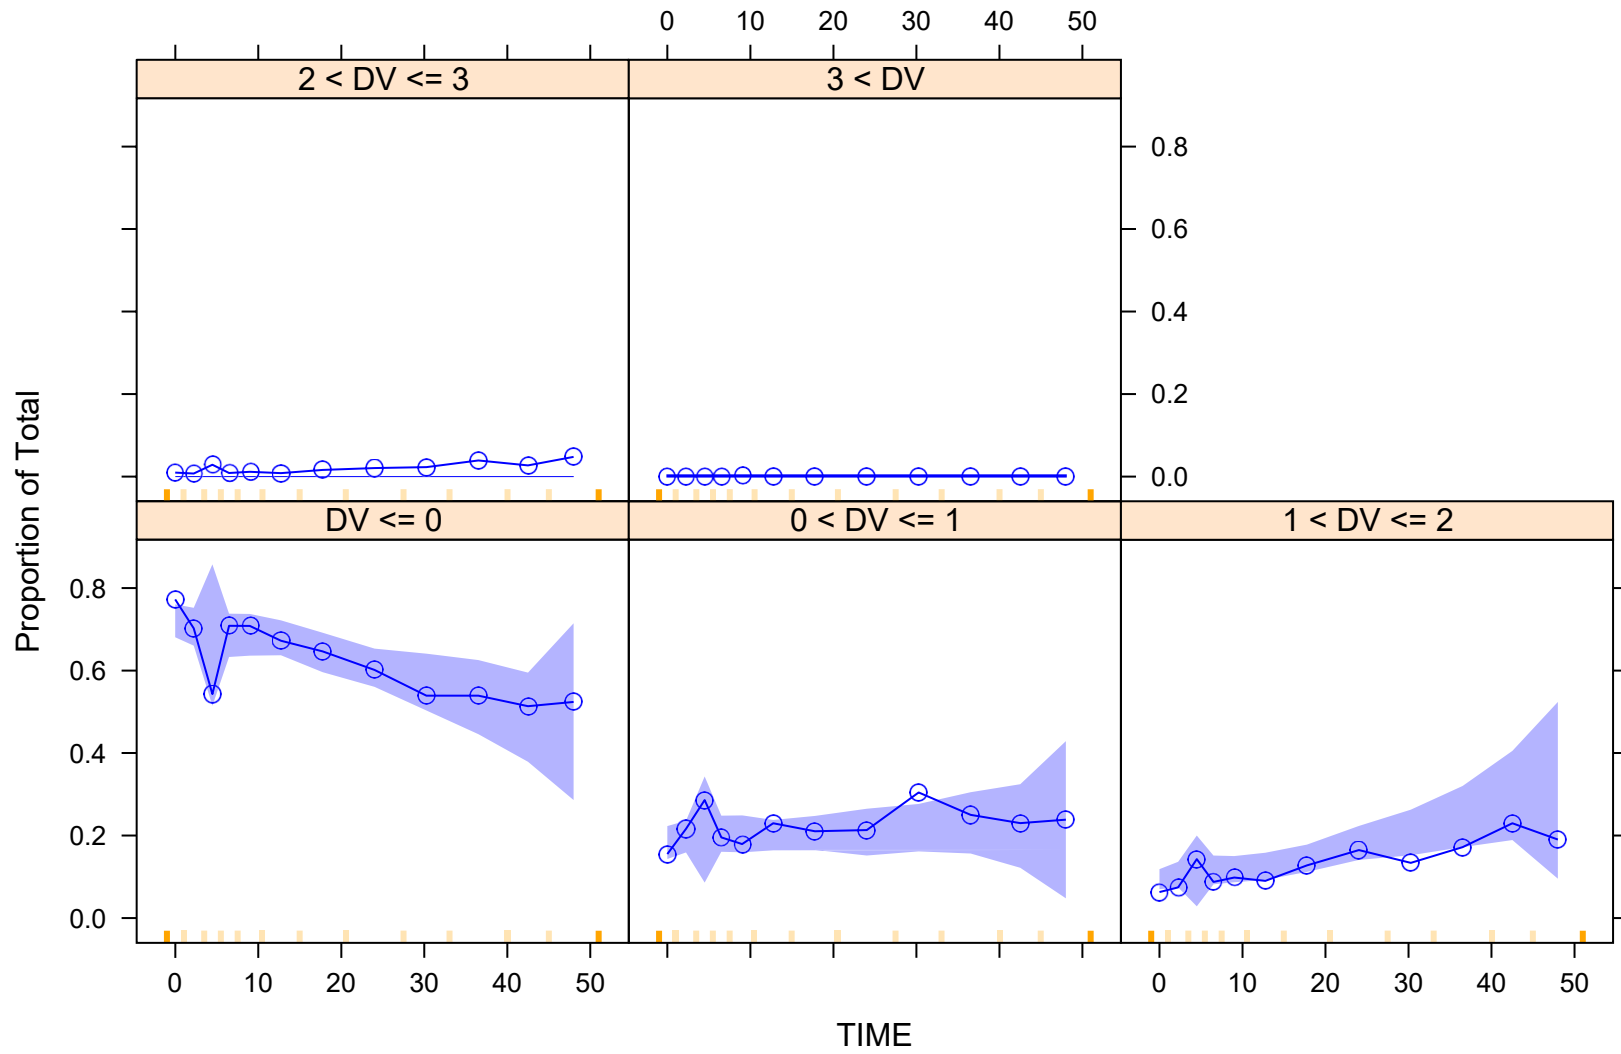

# ITEM == 34

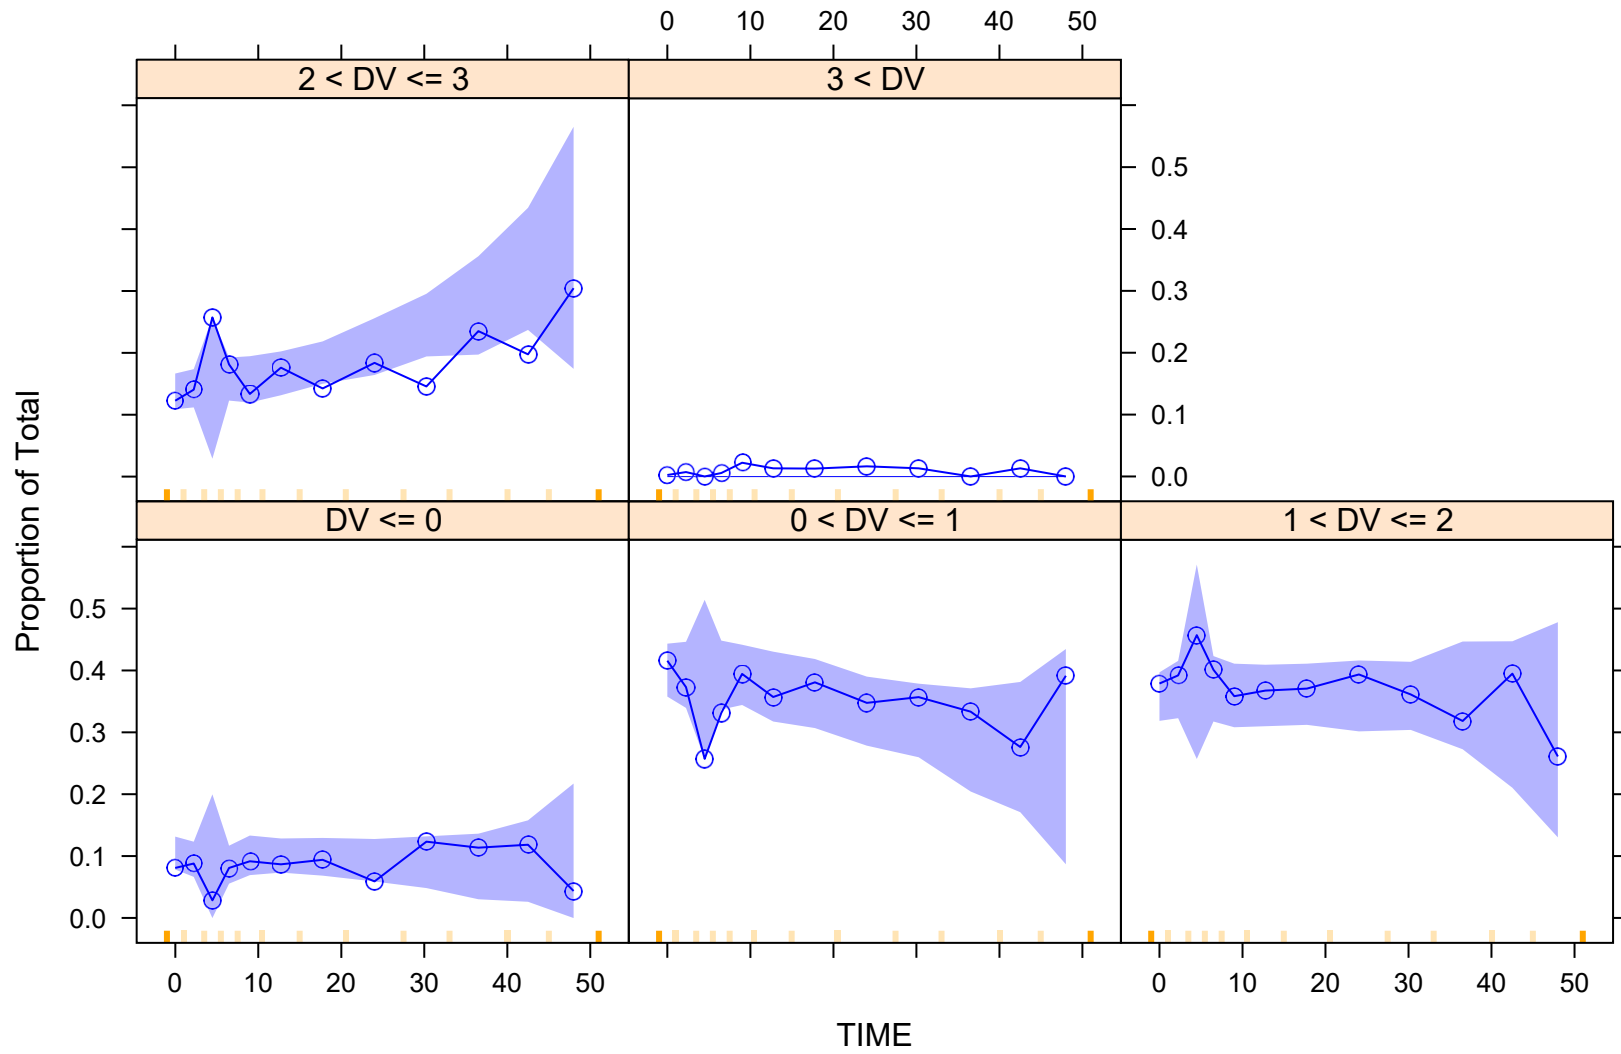

ITEM == 35

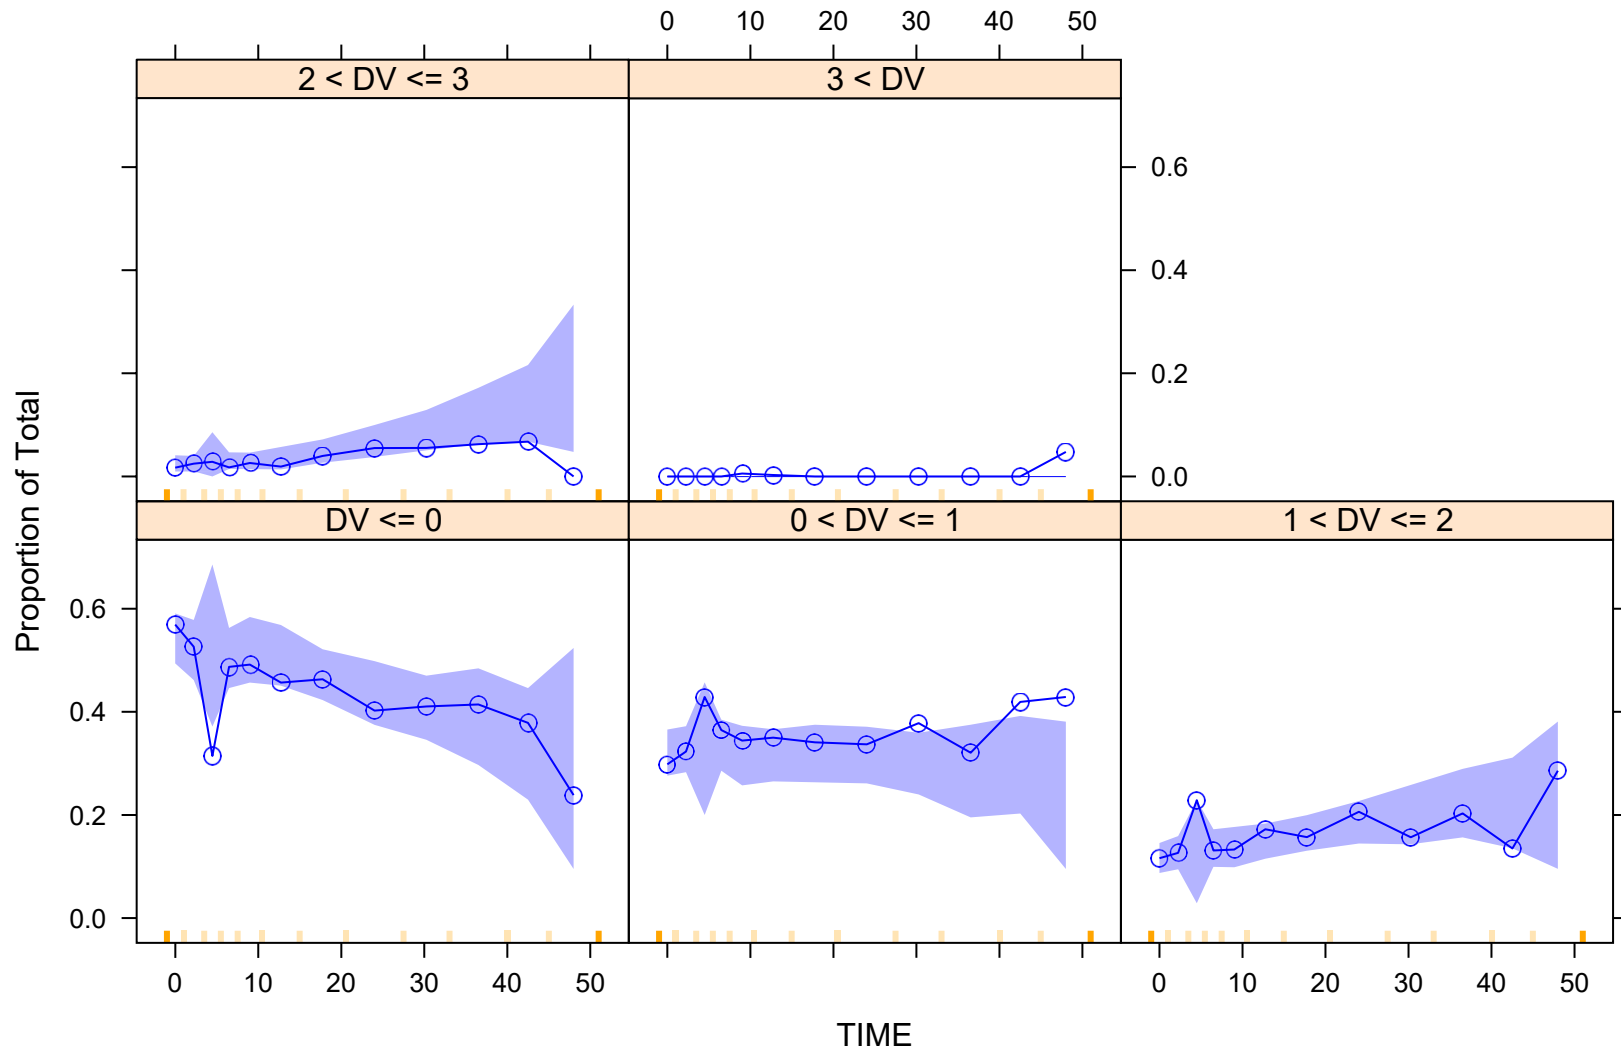

# ITEM == 36

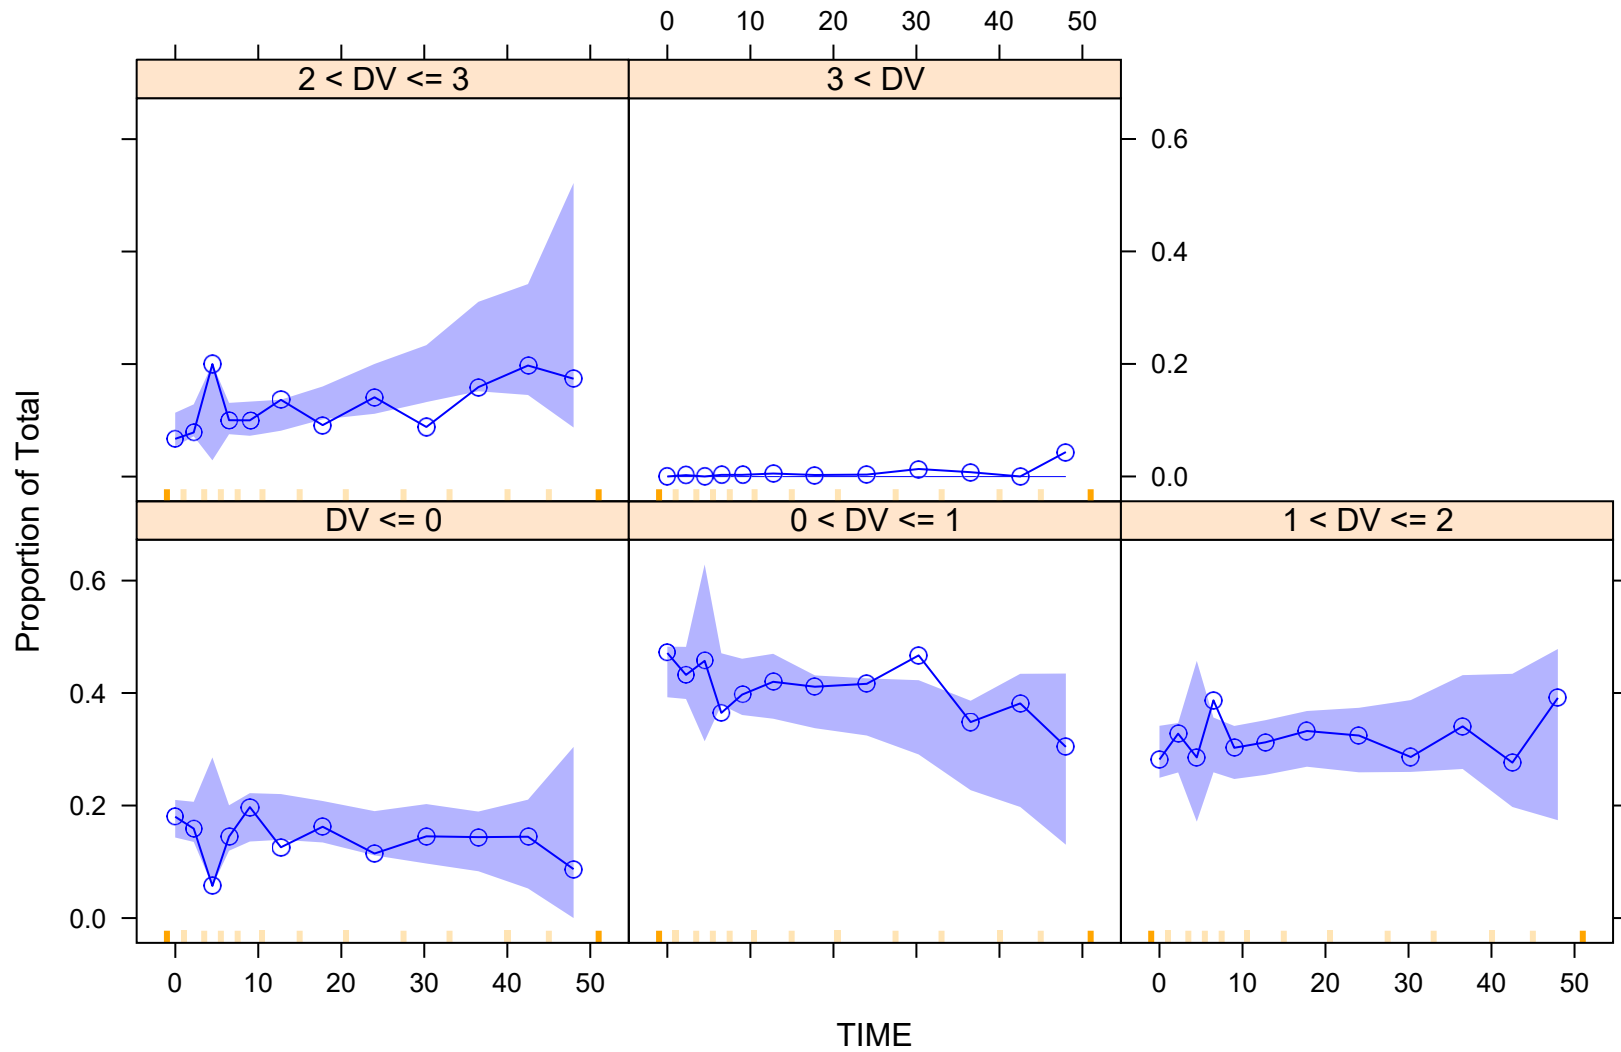



# ITEM == 37

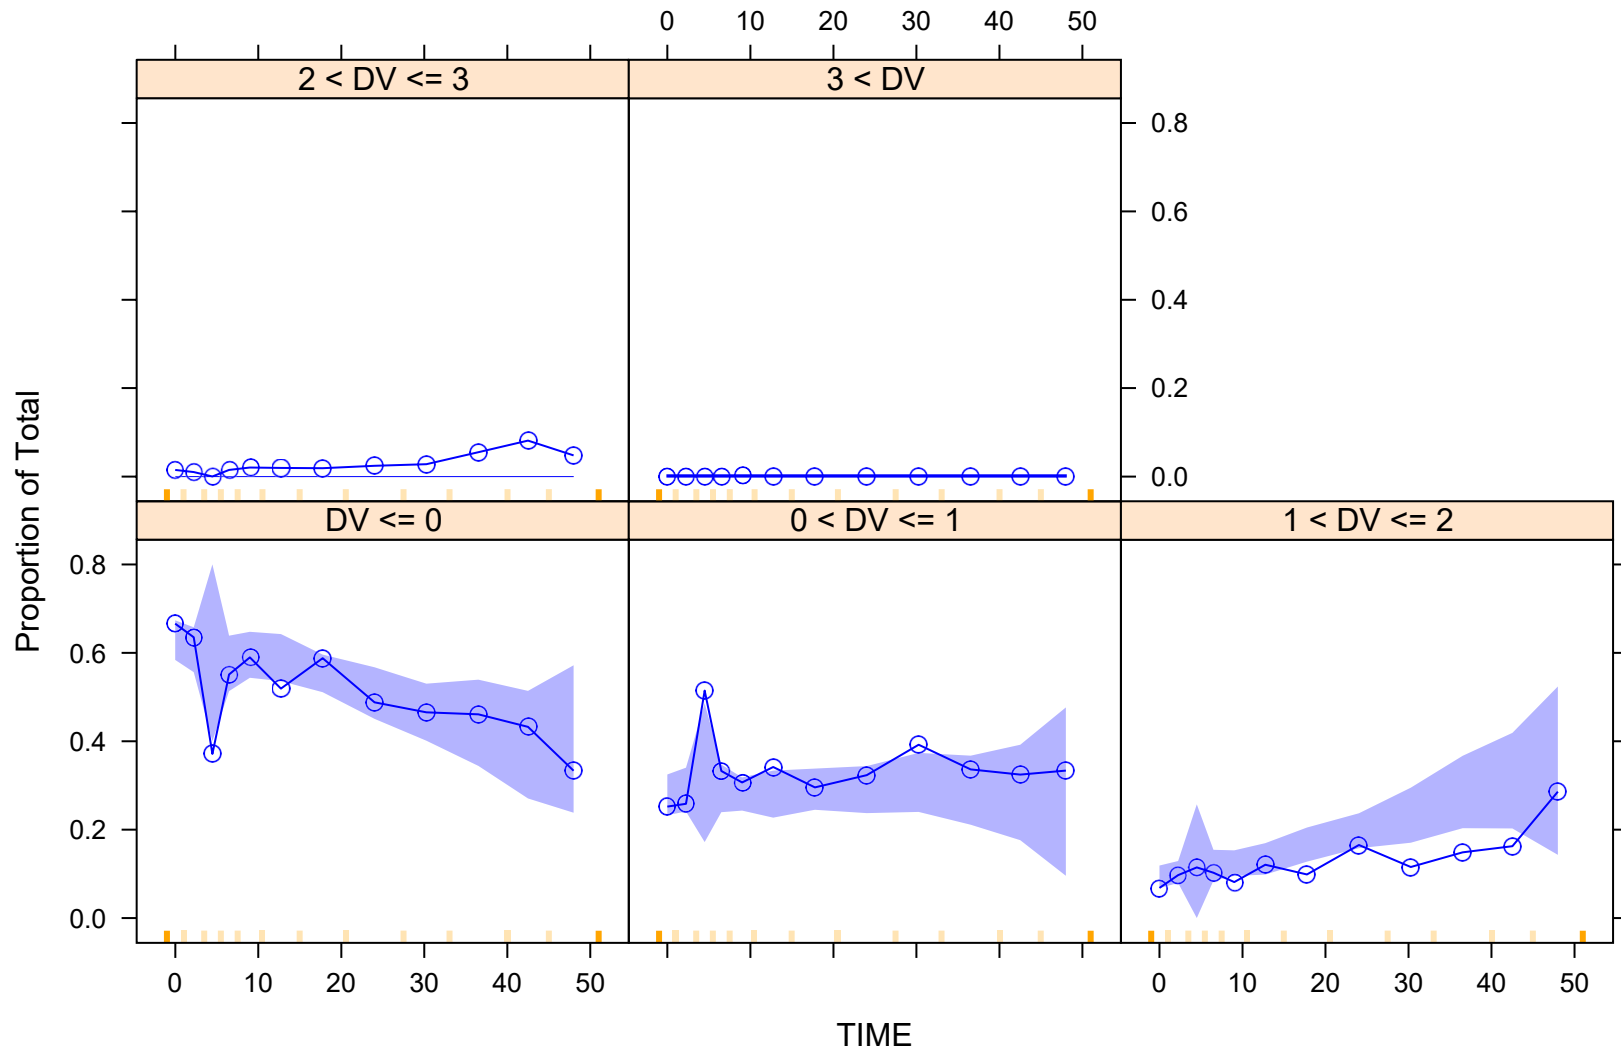

# ITEM == 38

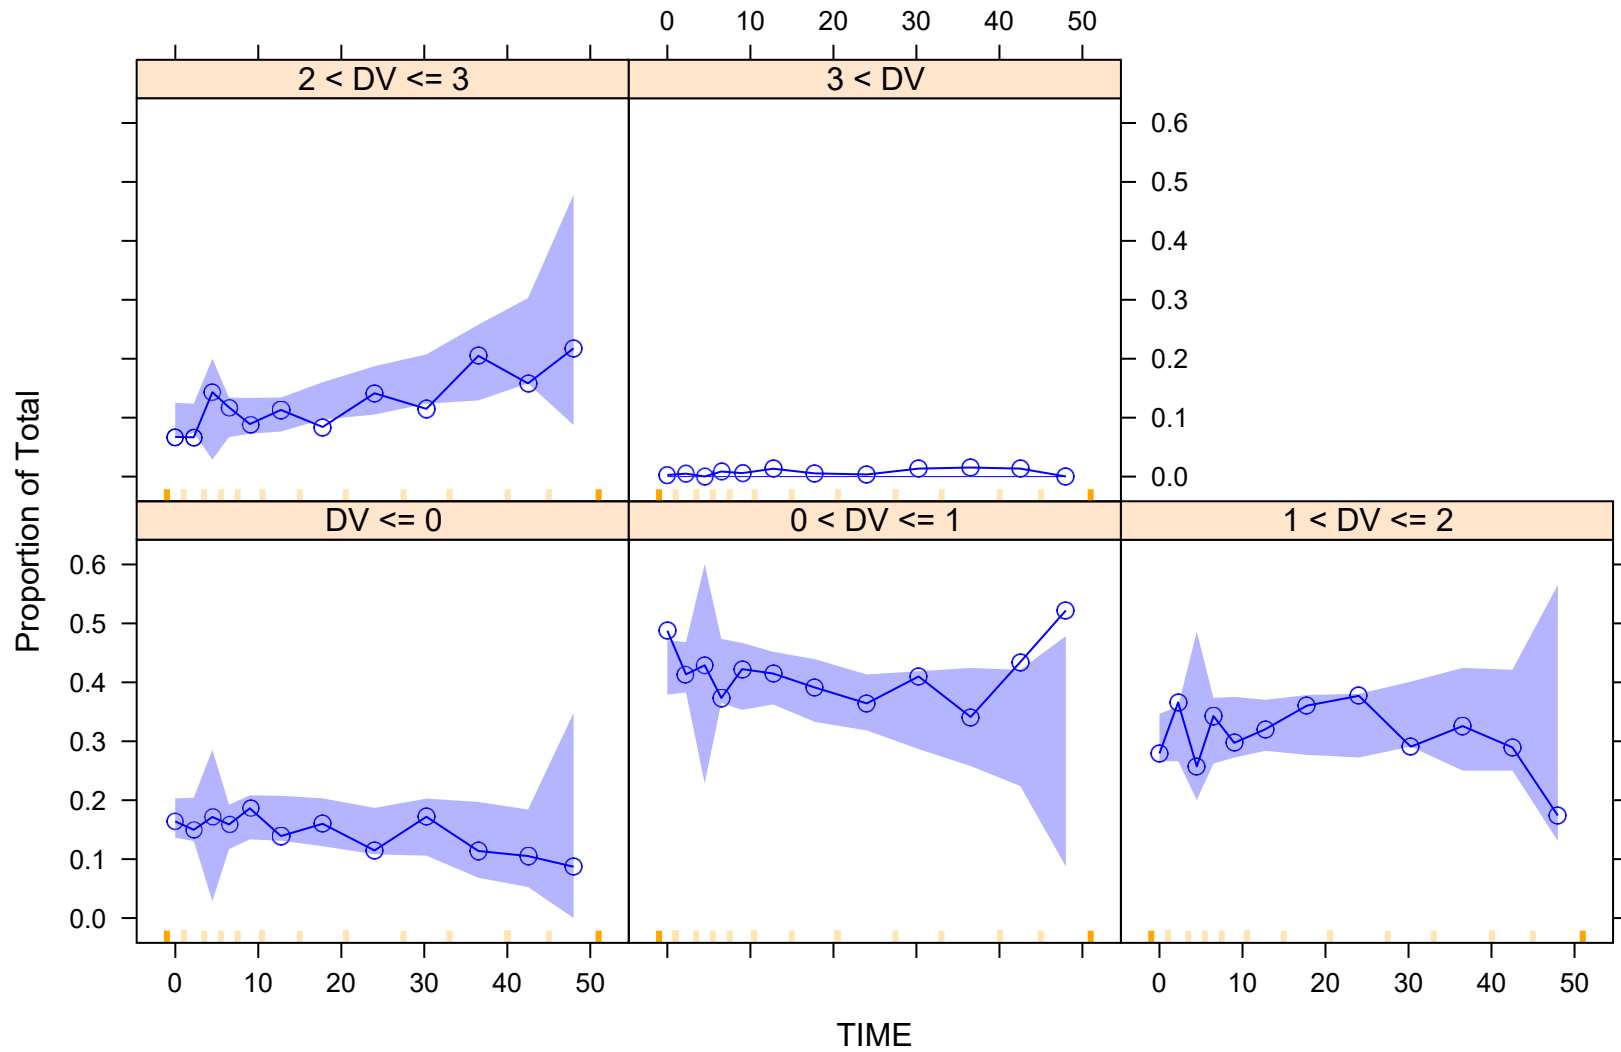

# ITEM == 39

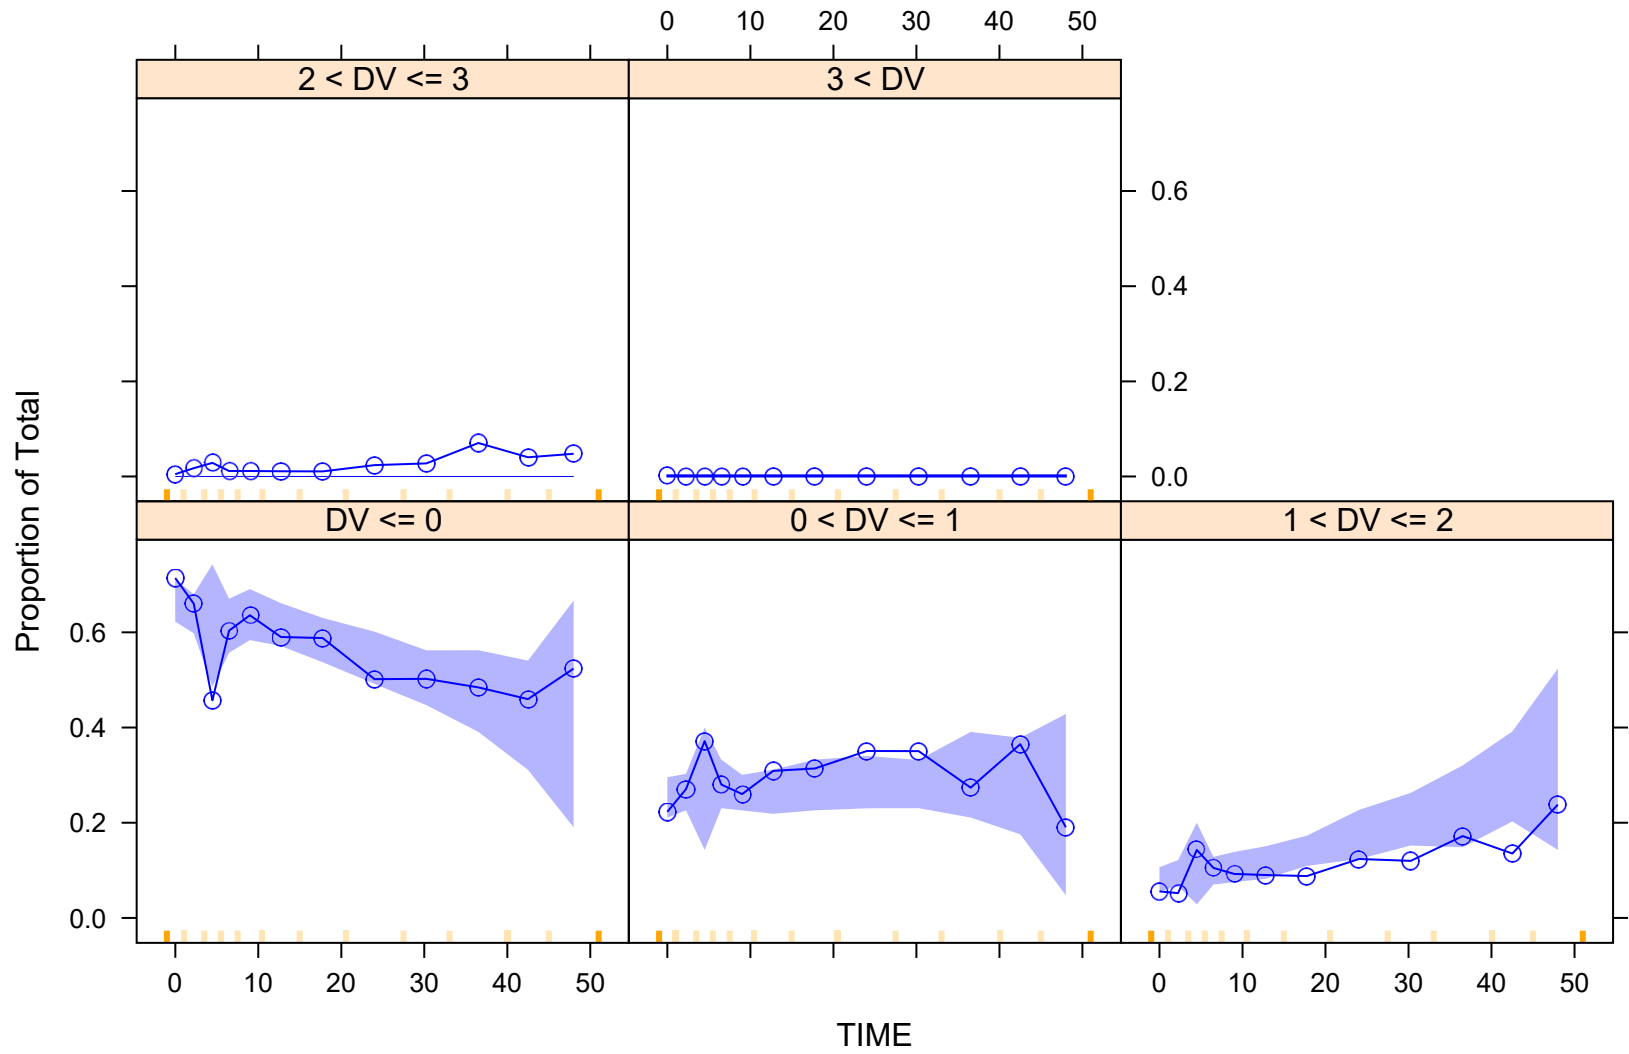

# ITEM == 40

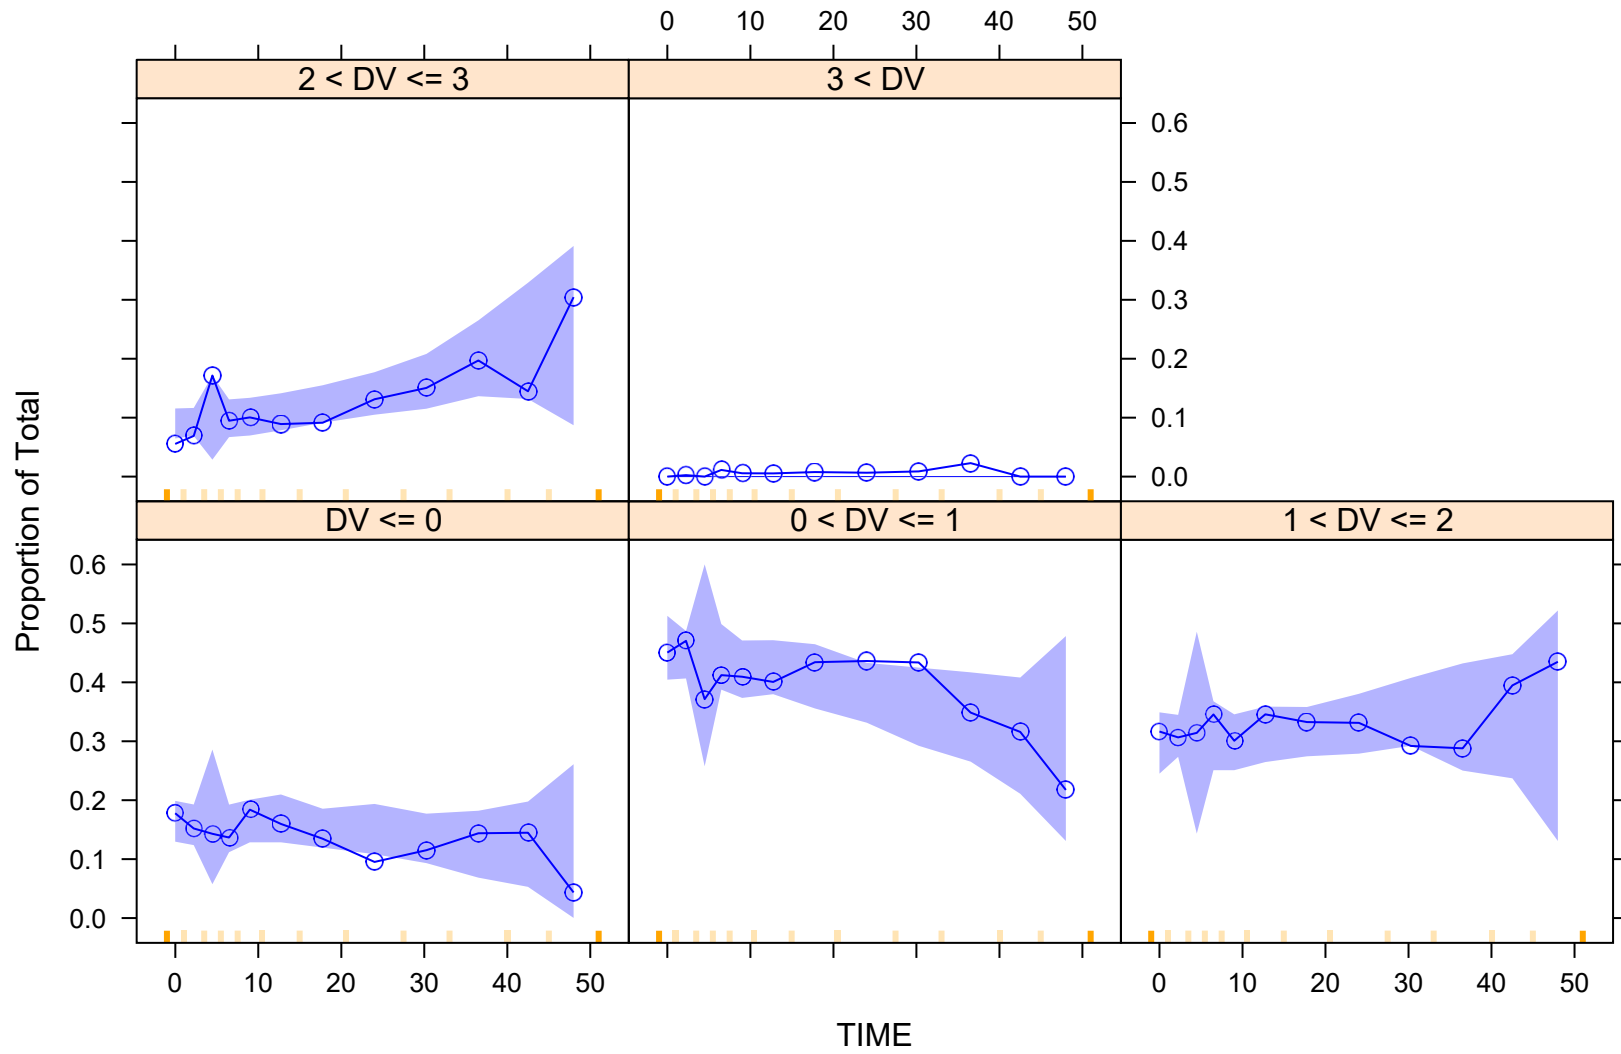

# ITEM == 41

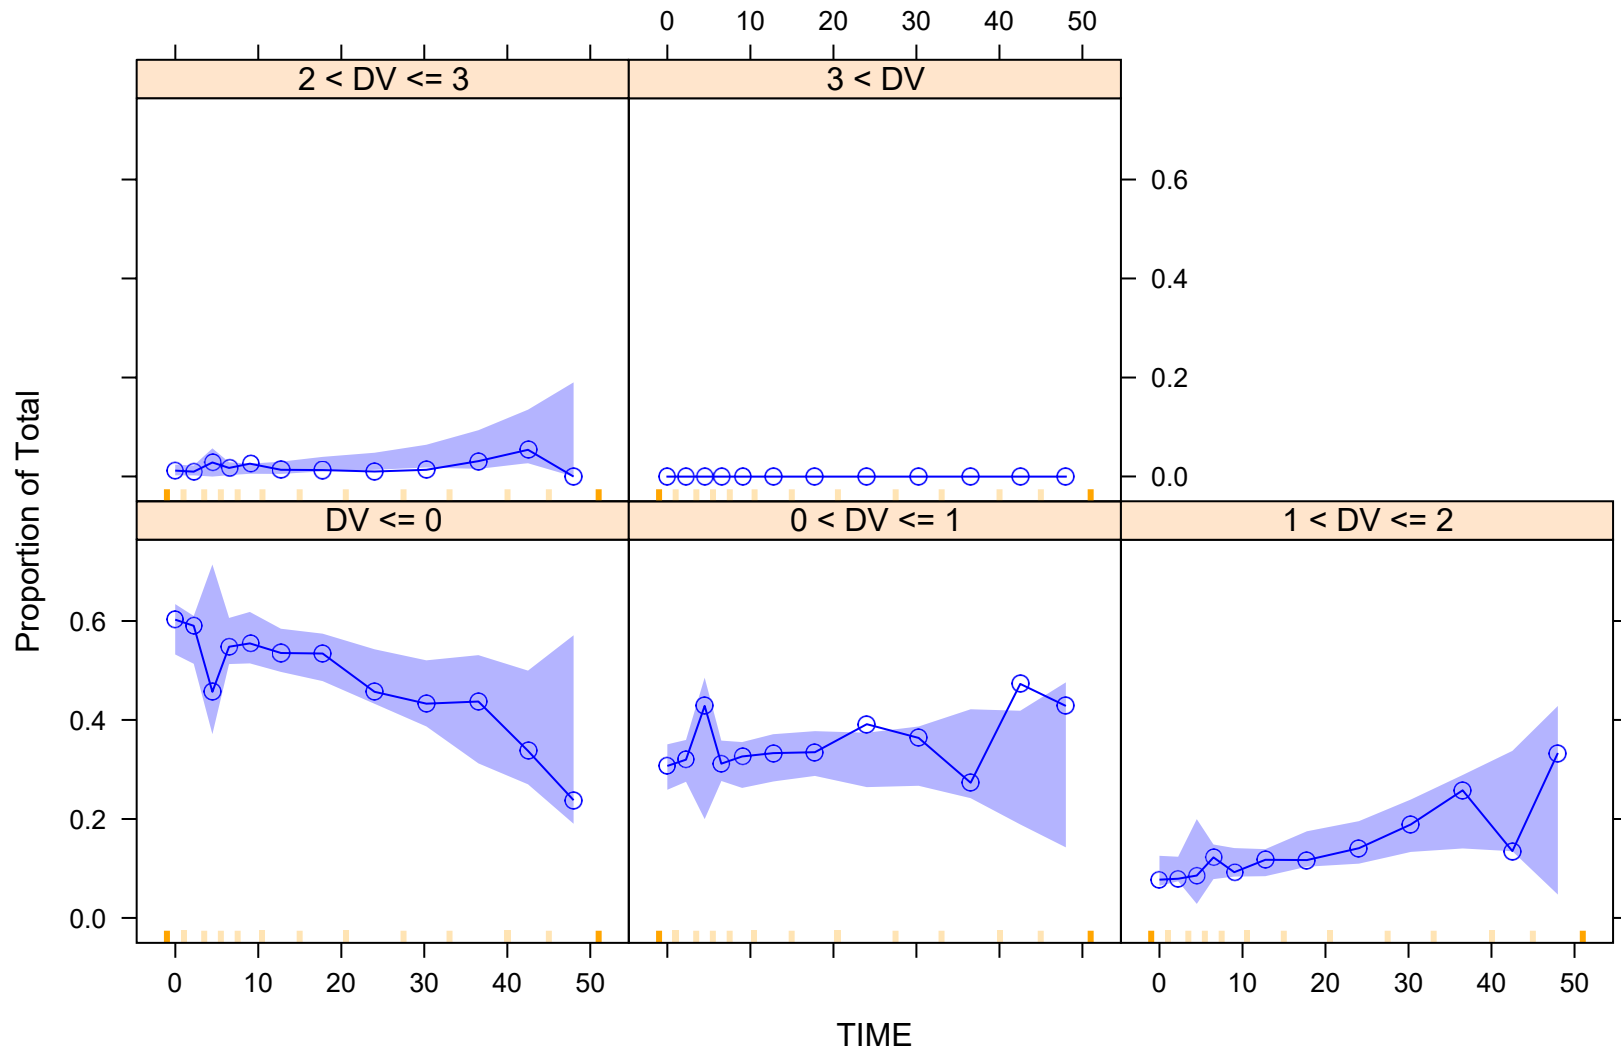

ITEM == 42

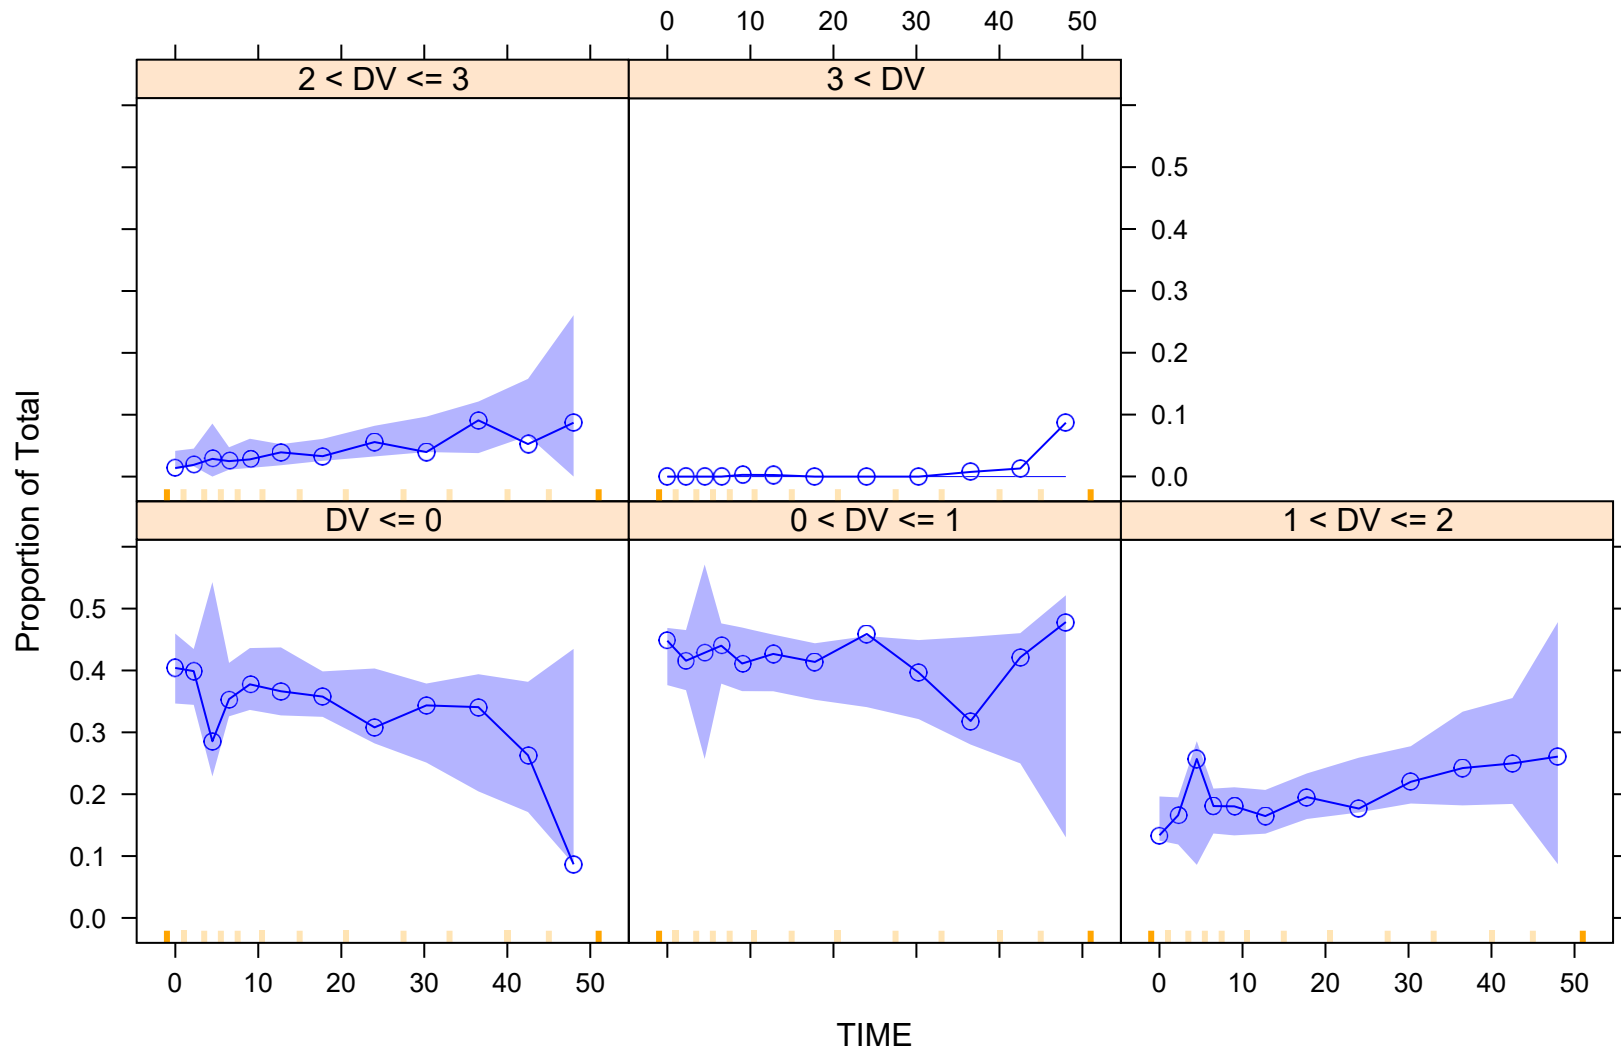

# ITEM == 43

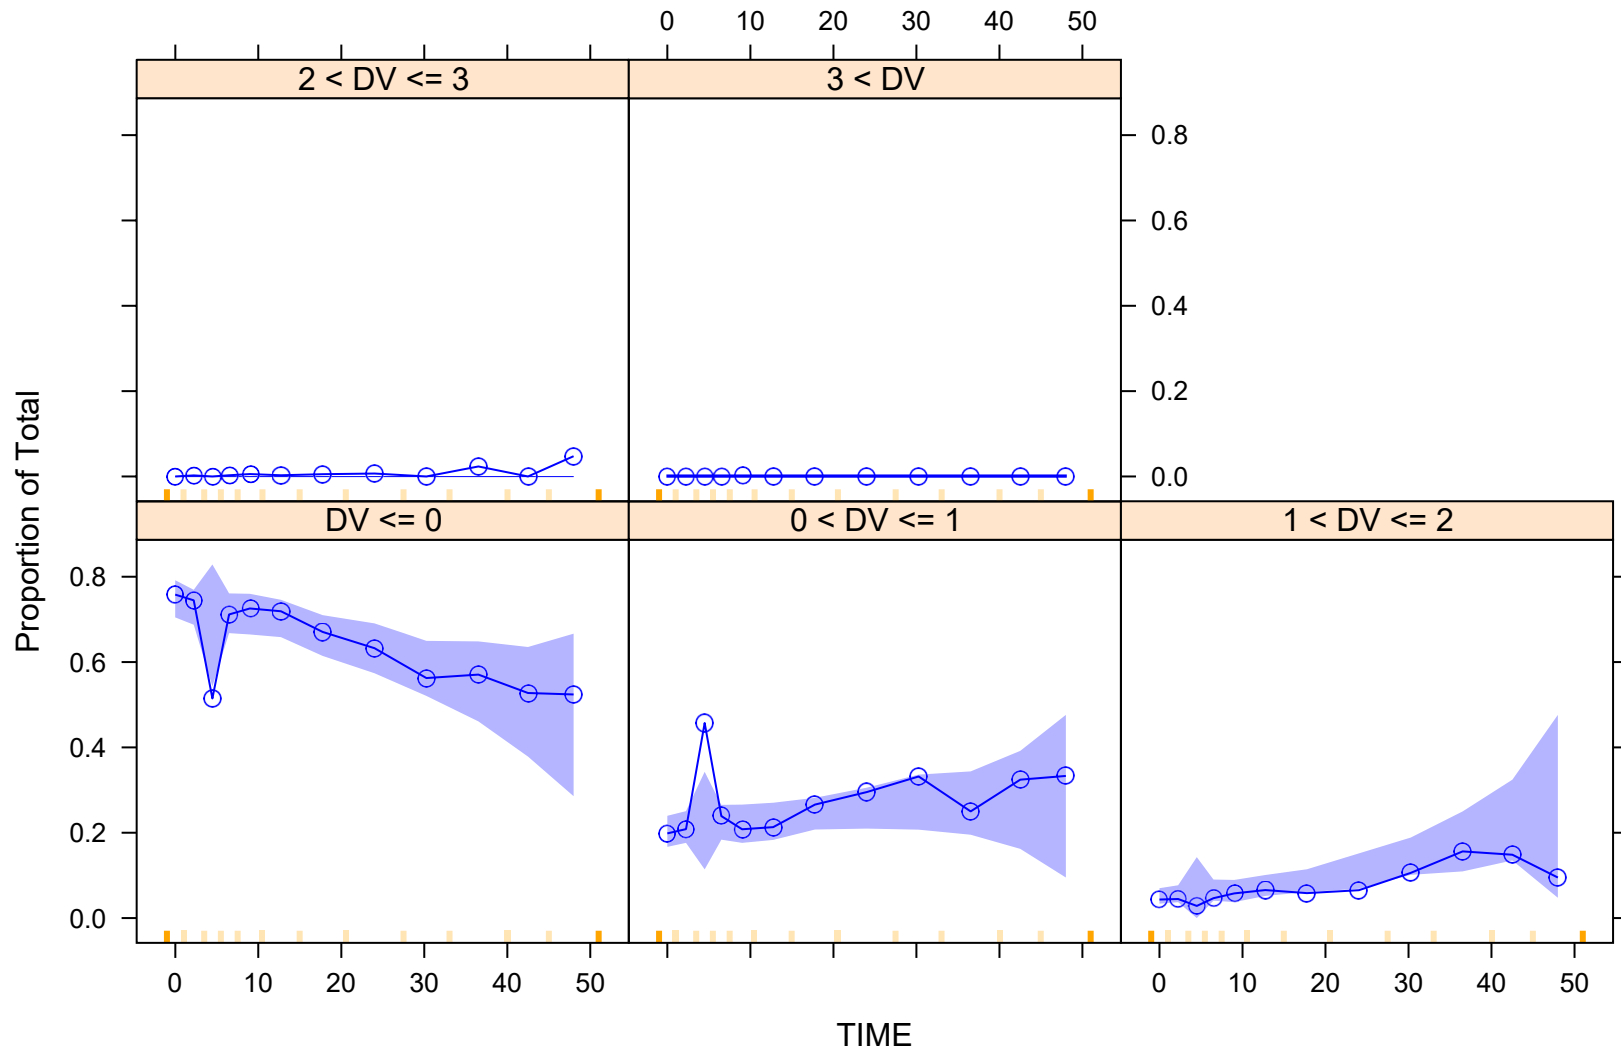

ITEM == 44

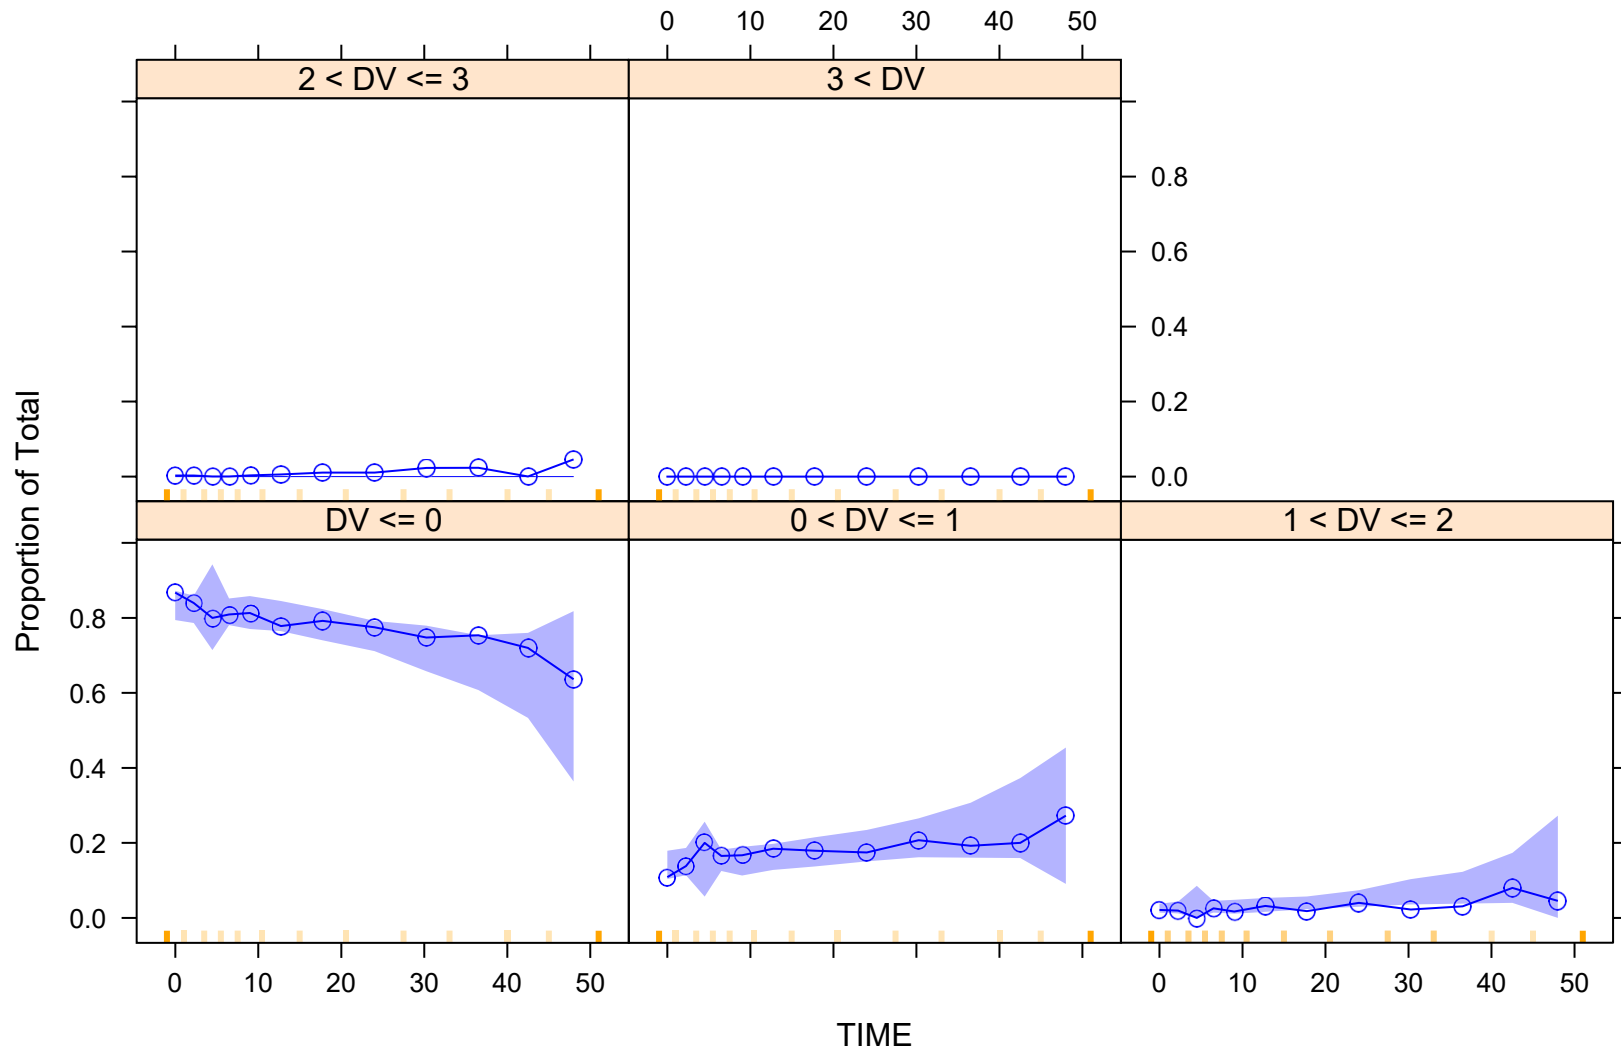



# ITEM == 45

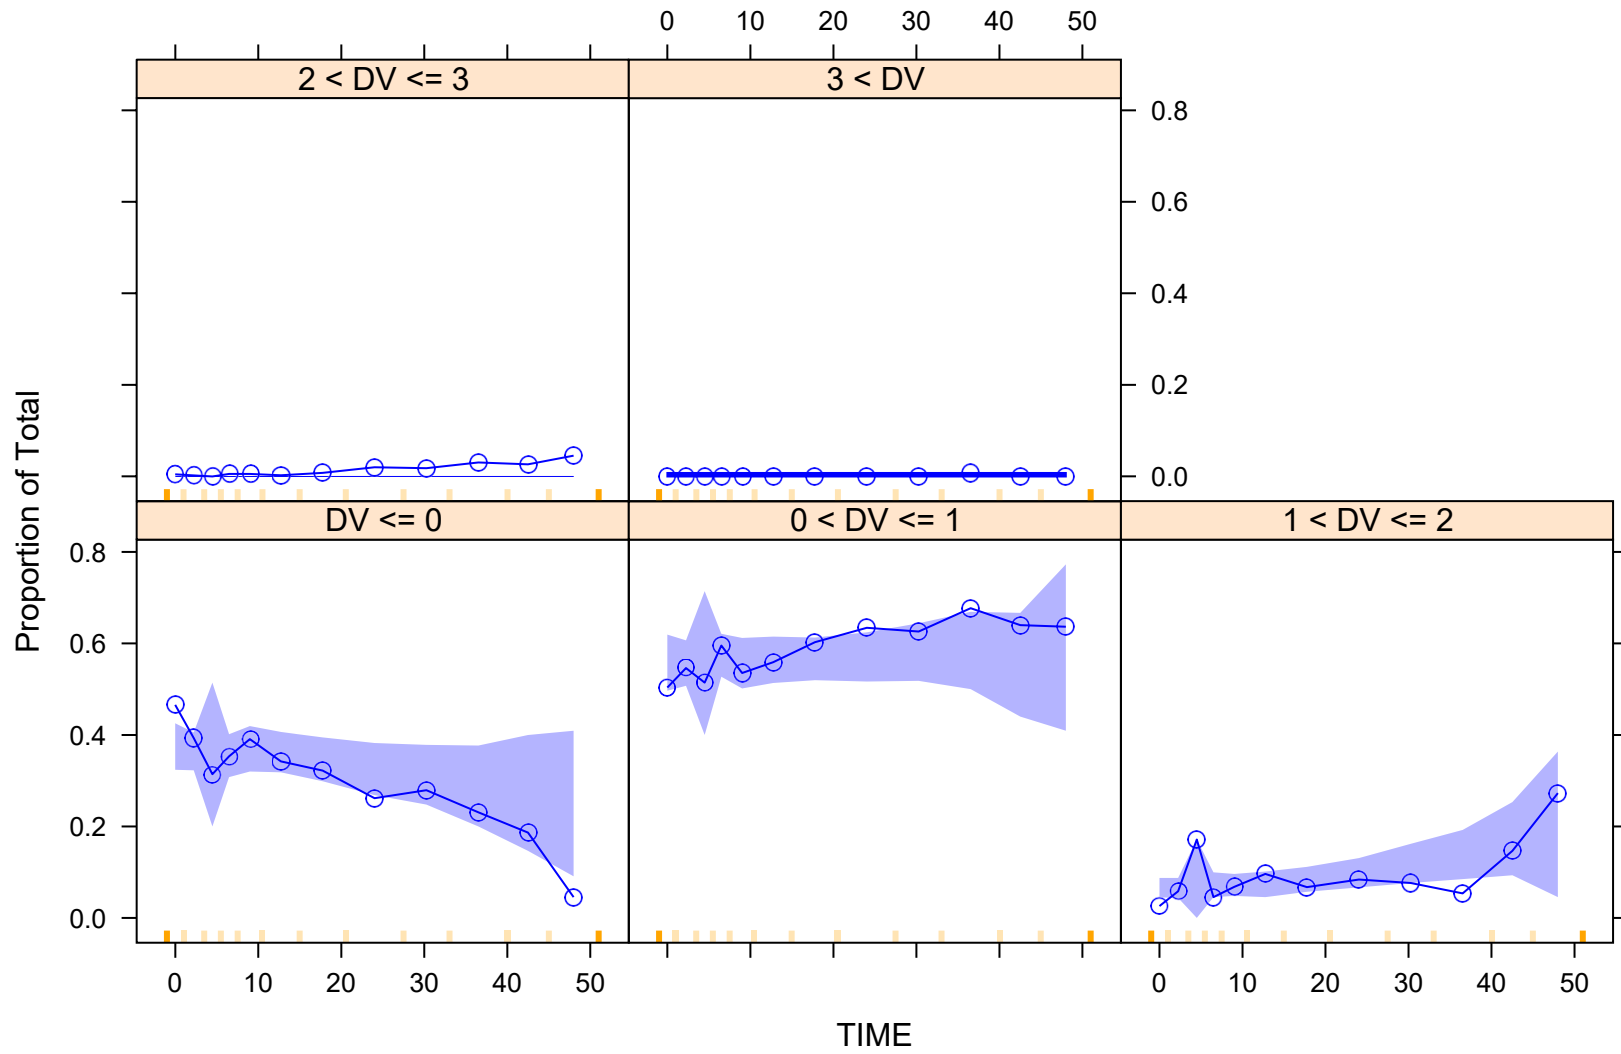

# ITEM == 47

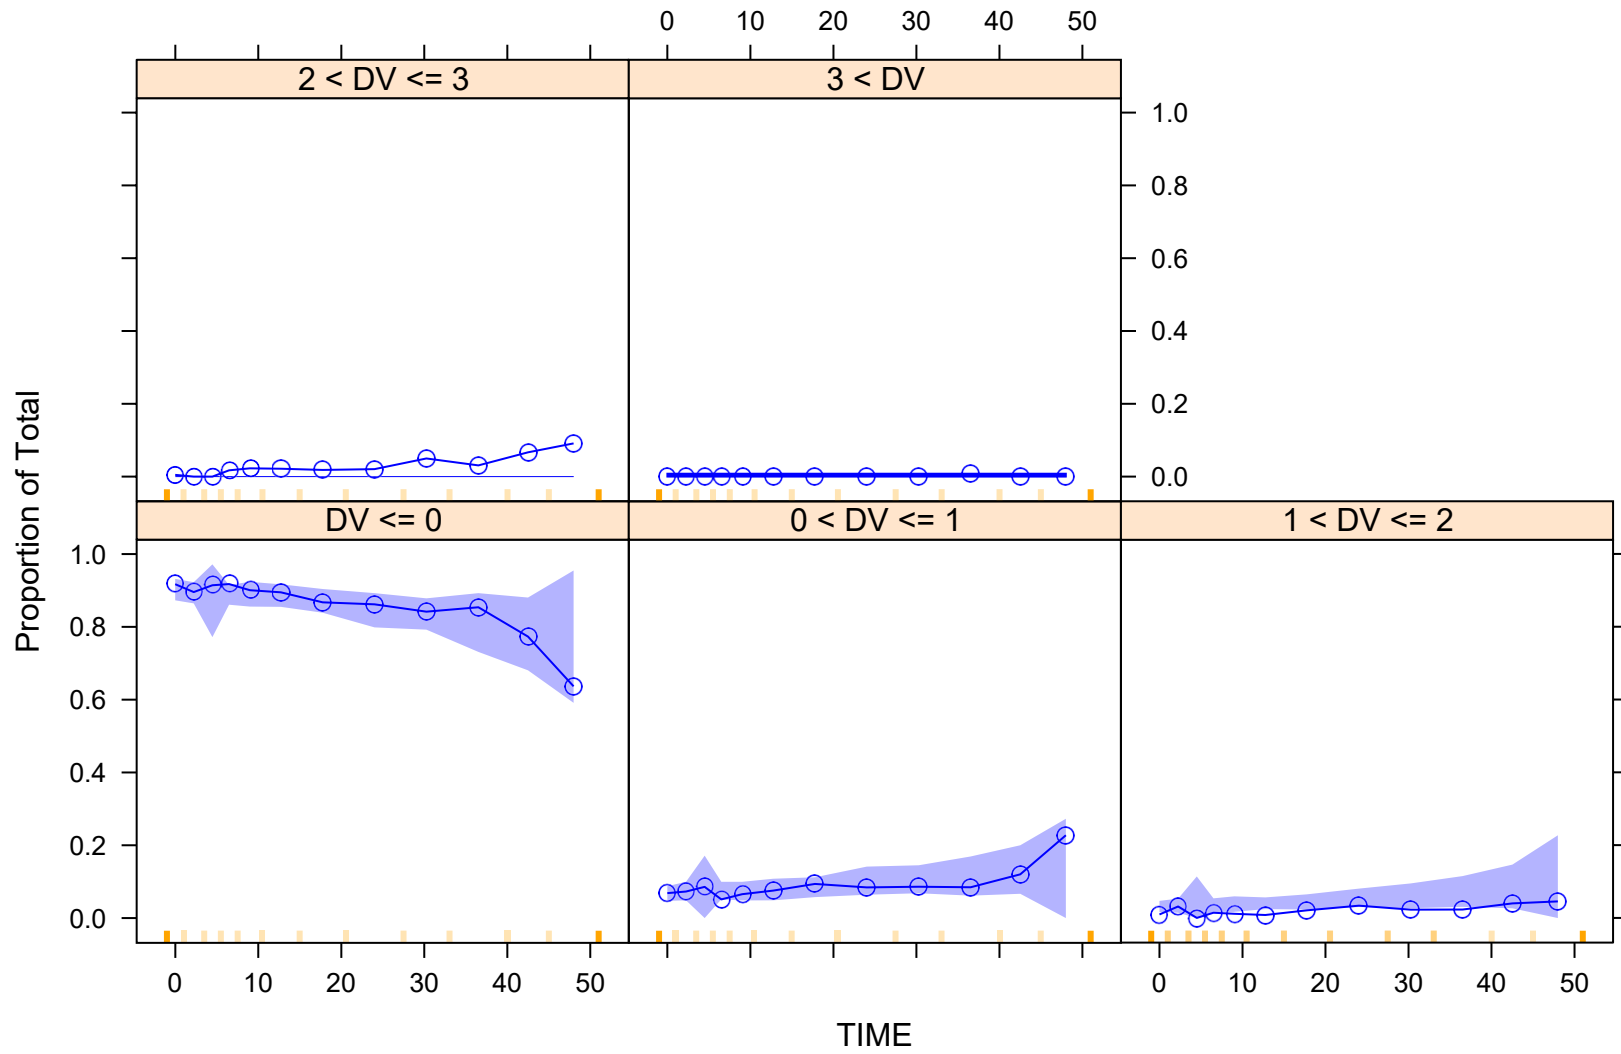

# ITEM == 48

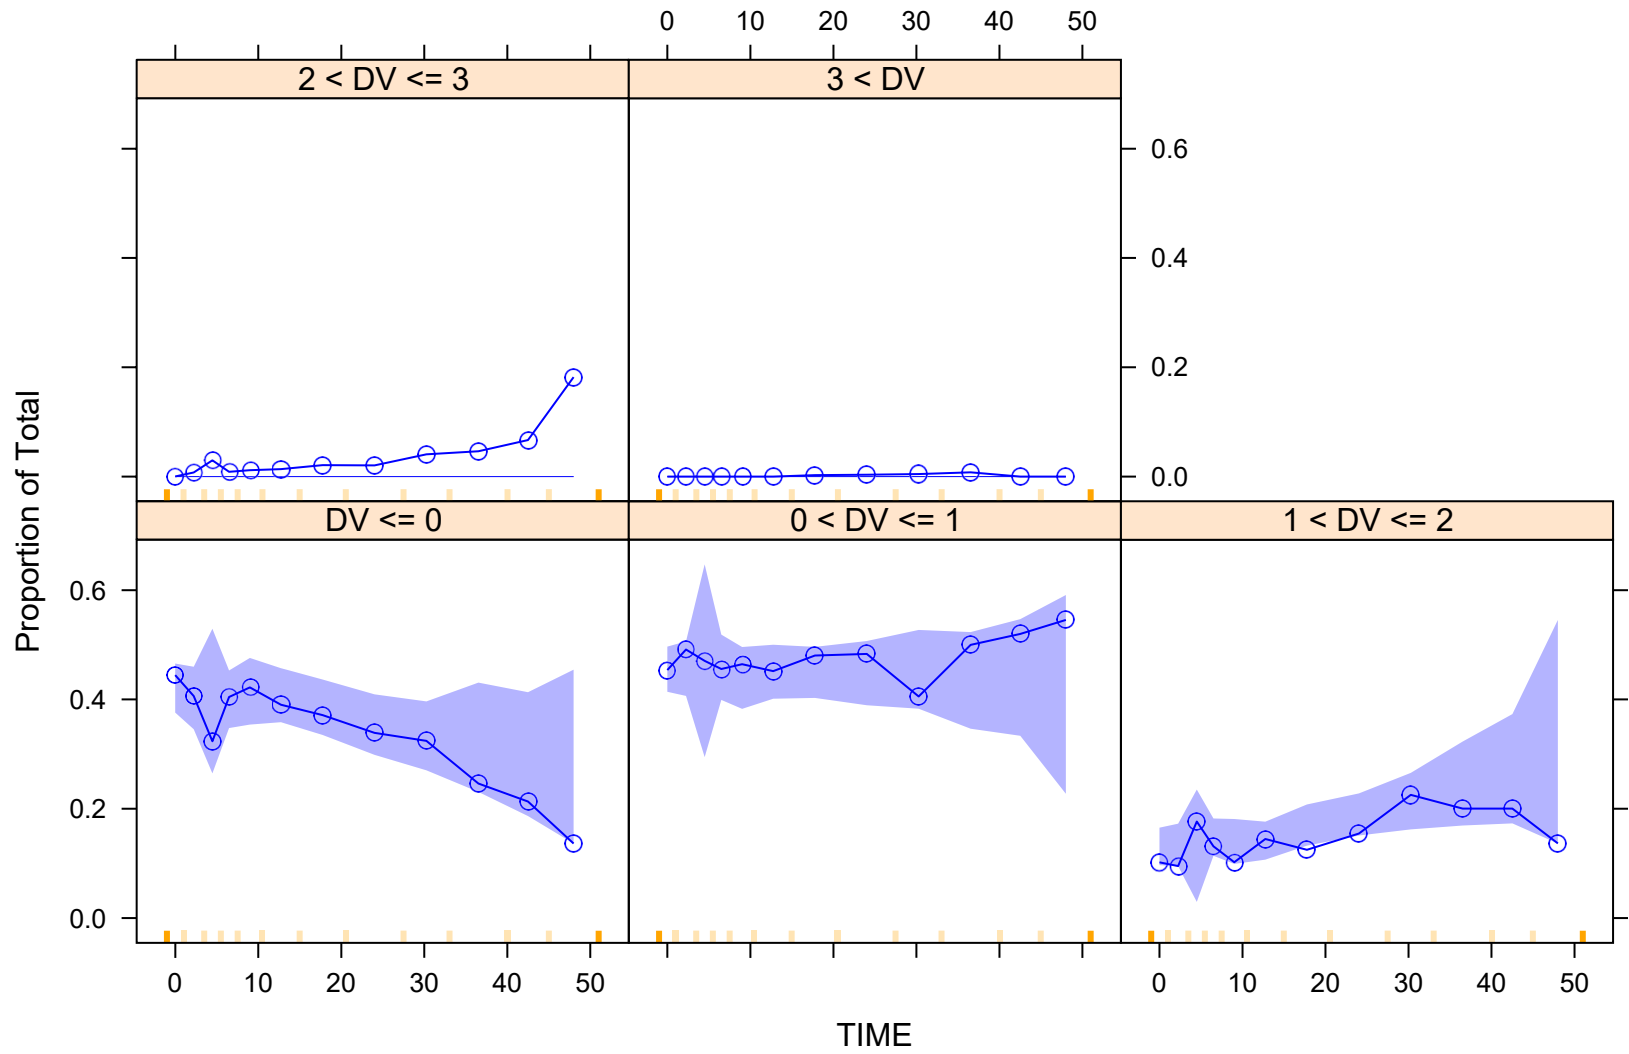

# ITEM == 49

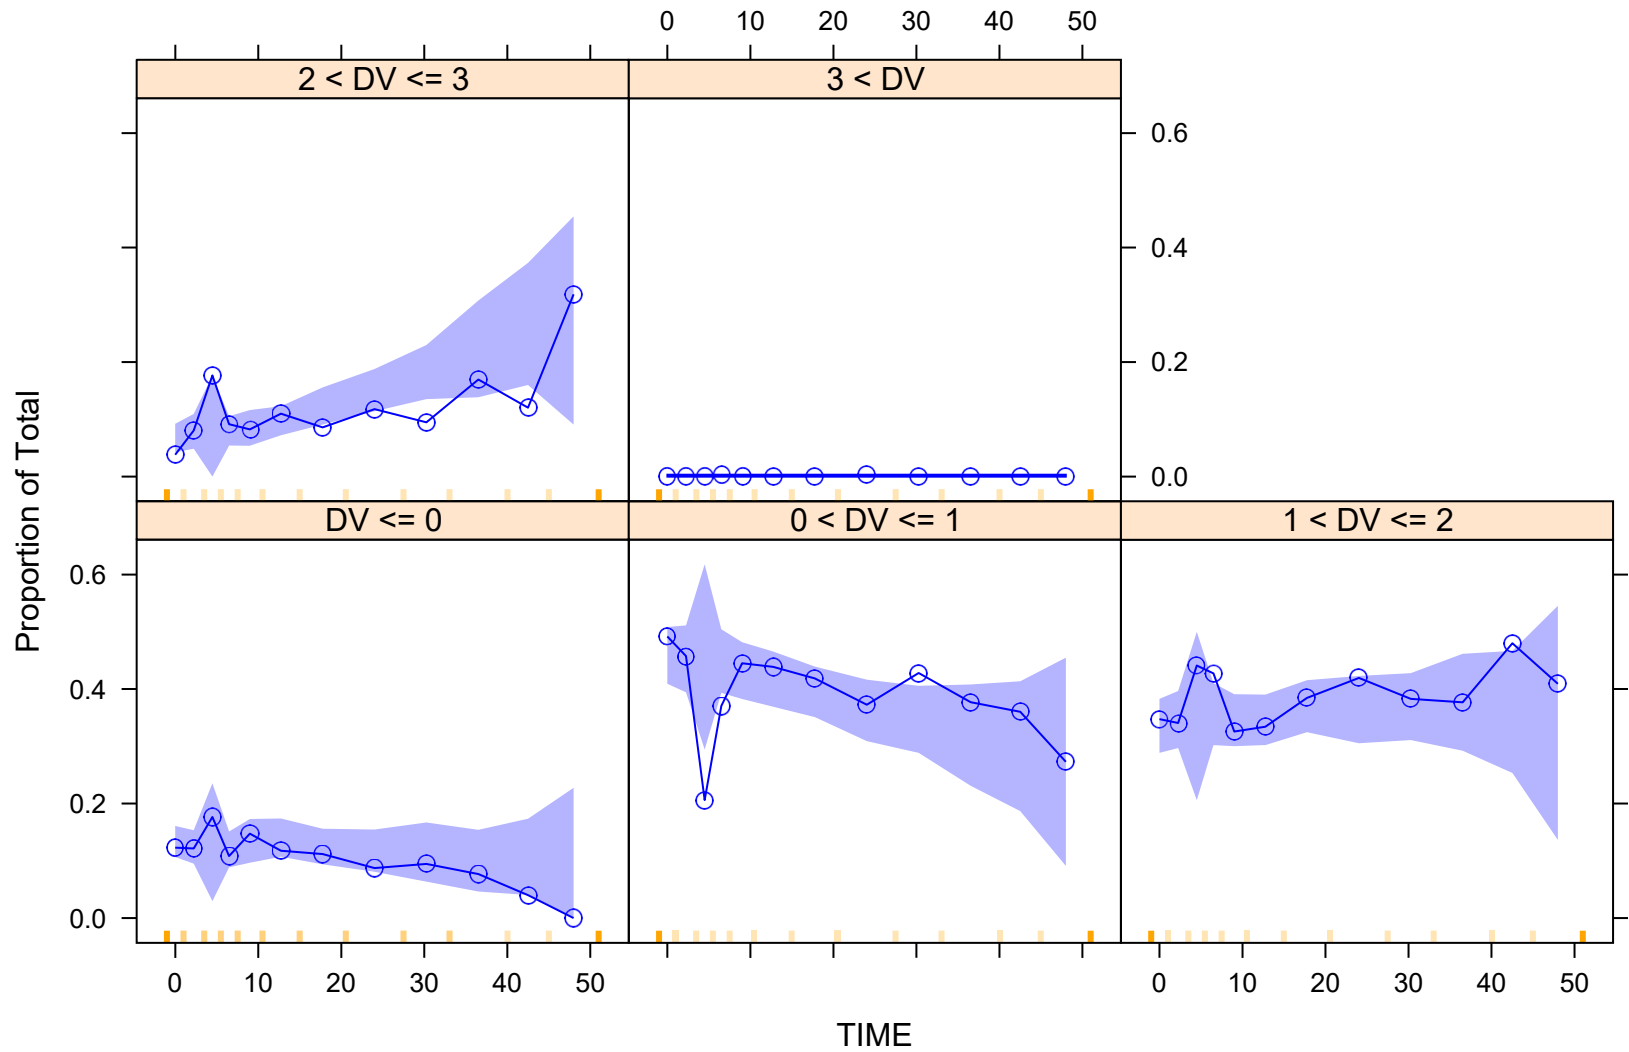

Figure S2 . Item Characteristic Curves (ICC) for all motor score items in the 100% (all items) scenario. Black dots indicate the observed scores. Panel with “1” (left most column) shows values with scores 0 and  $\geq 1$ ; panel with “2” (second column from left) shows values with scores 1 and  $\geq 2$ ; panel with “3” (third column from left) shows values with scores 2 and  $\geq 3$ ; and panel with “4” (right most column) shows values with scores 3 and  $\geq 4$ . The ICC curves from the IRT model fit (dark red line) is compared to the fit of a generalized additive model (GAM) with cross-validated cubic spline as a smoothing function (blue line and the associated 95% confidence interval is shown in grey)

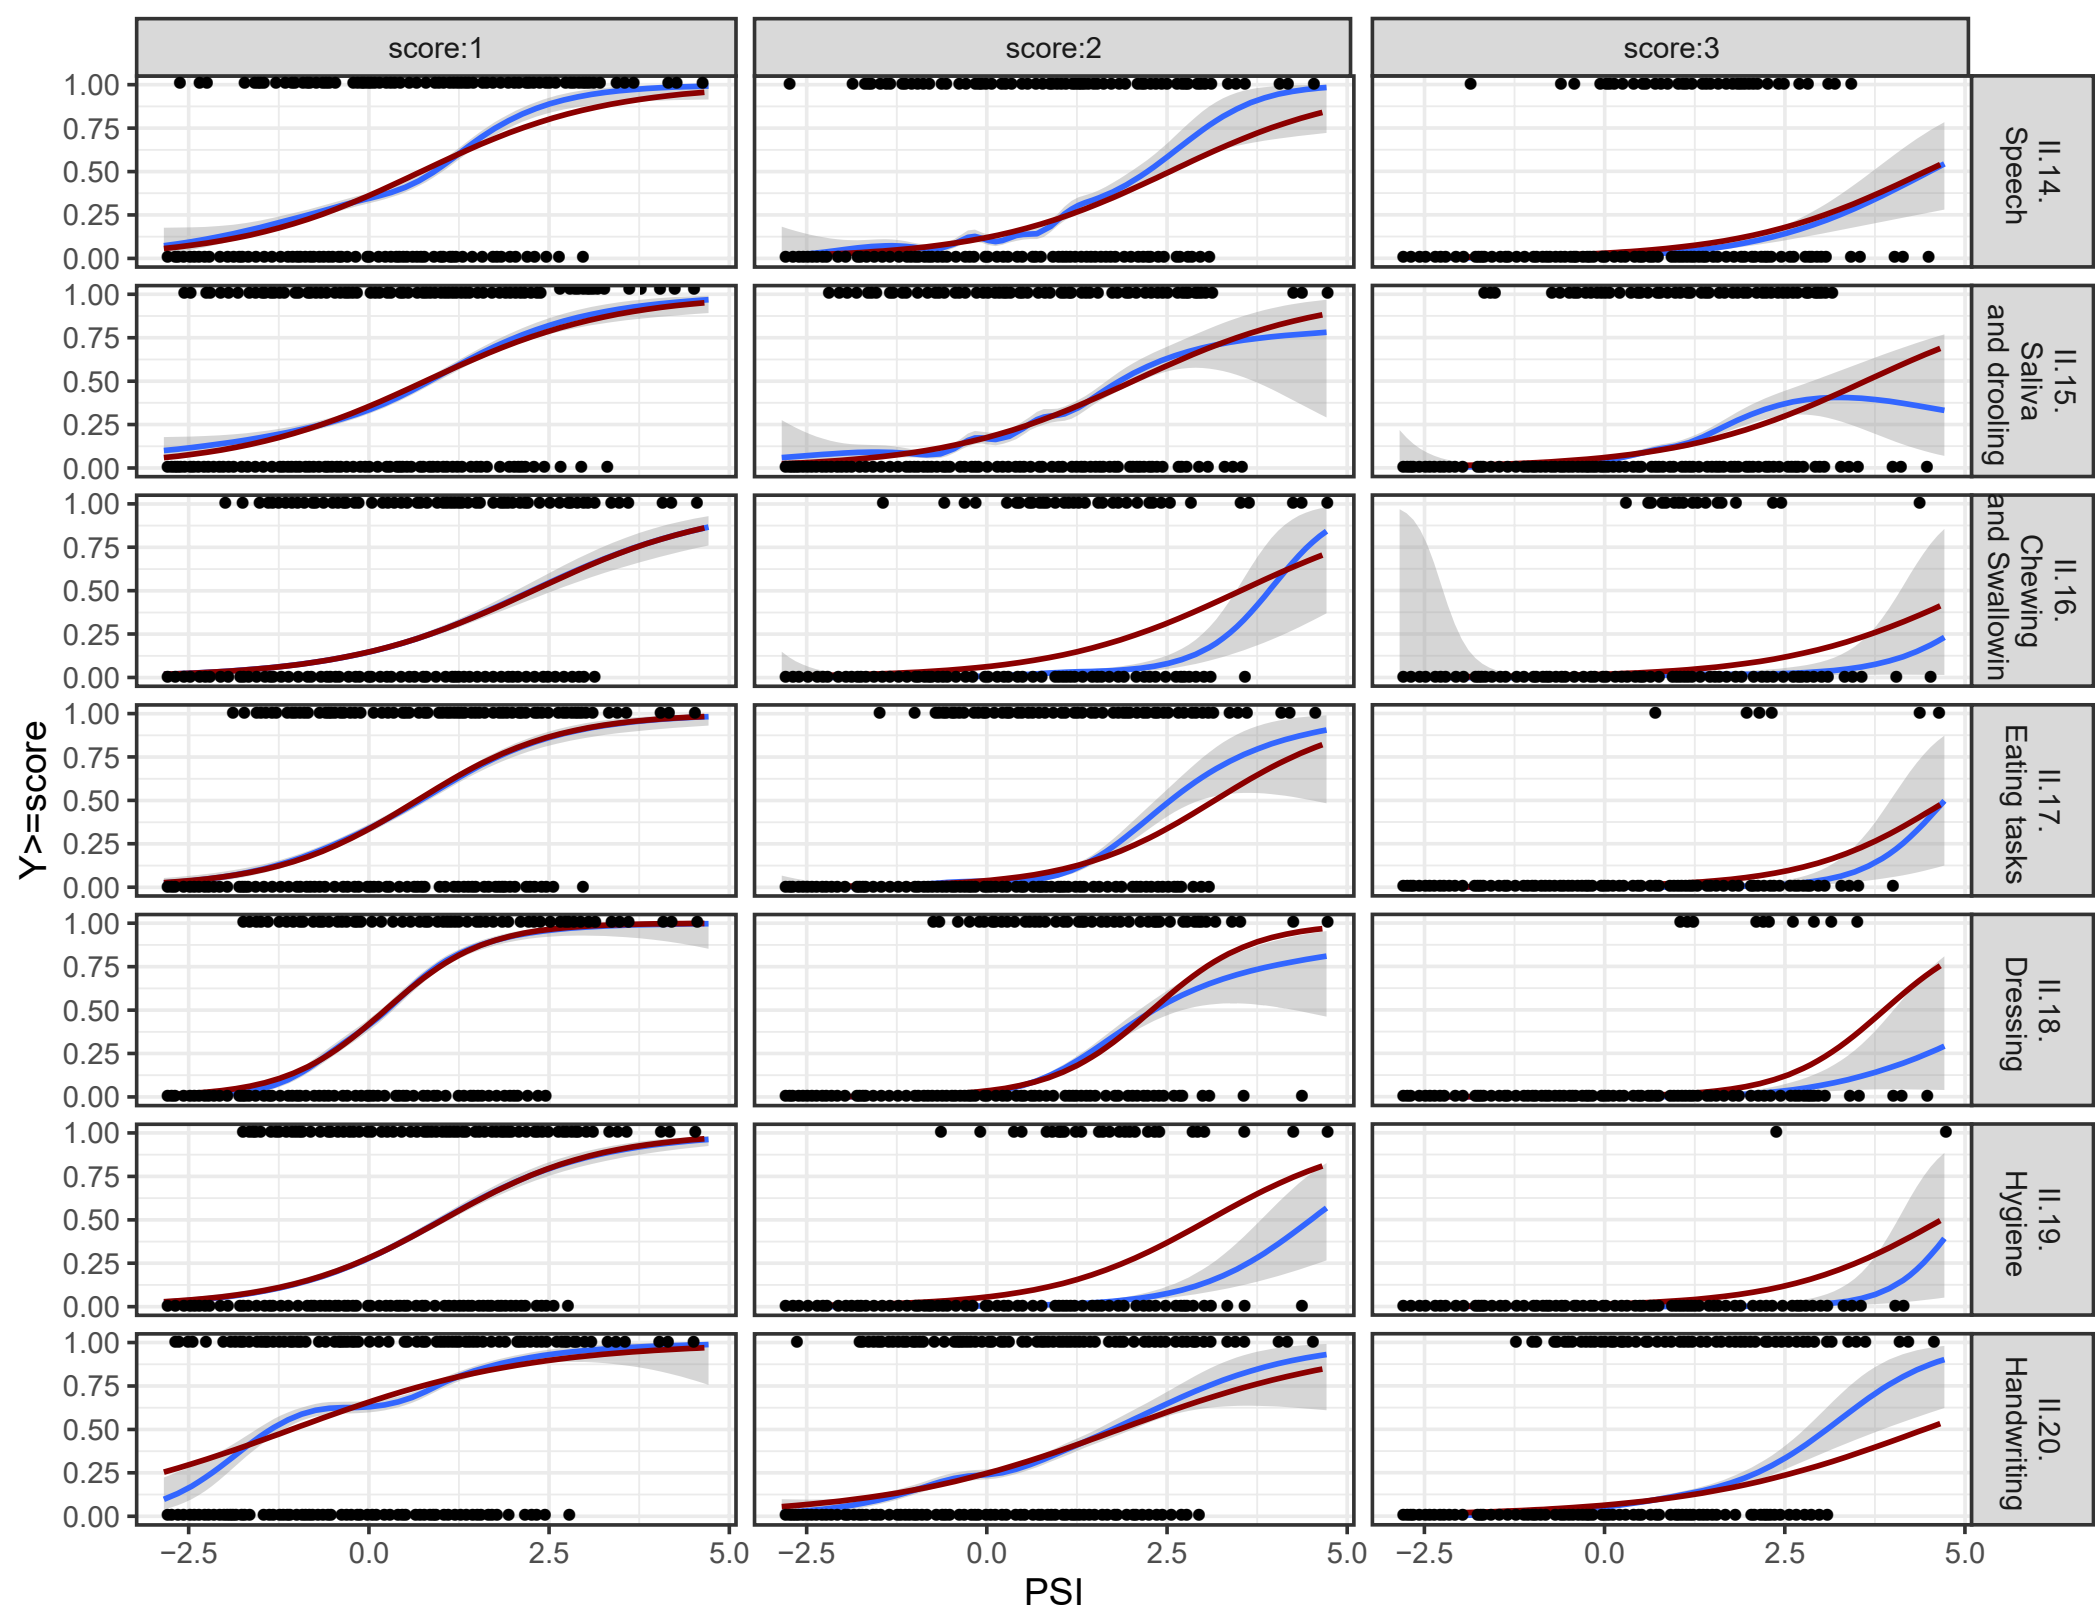

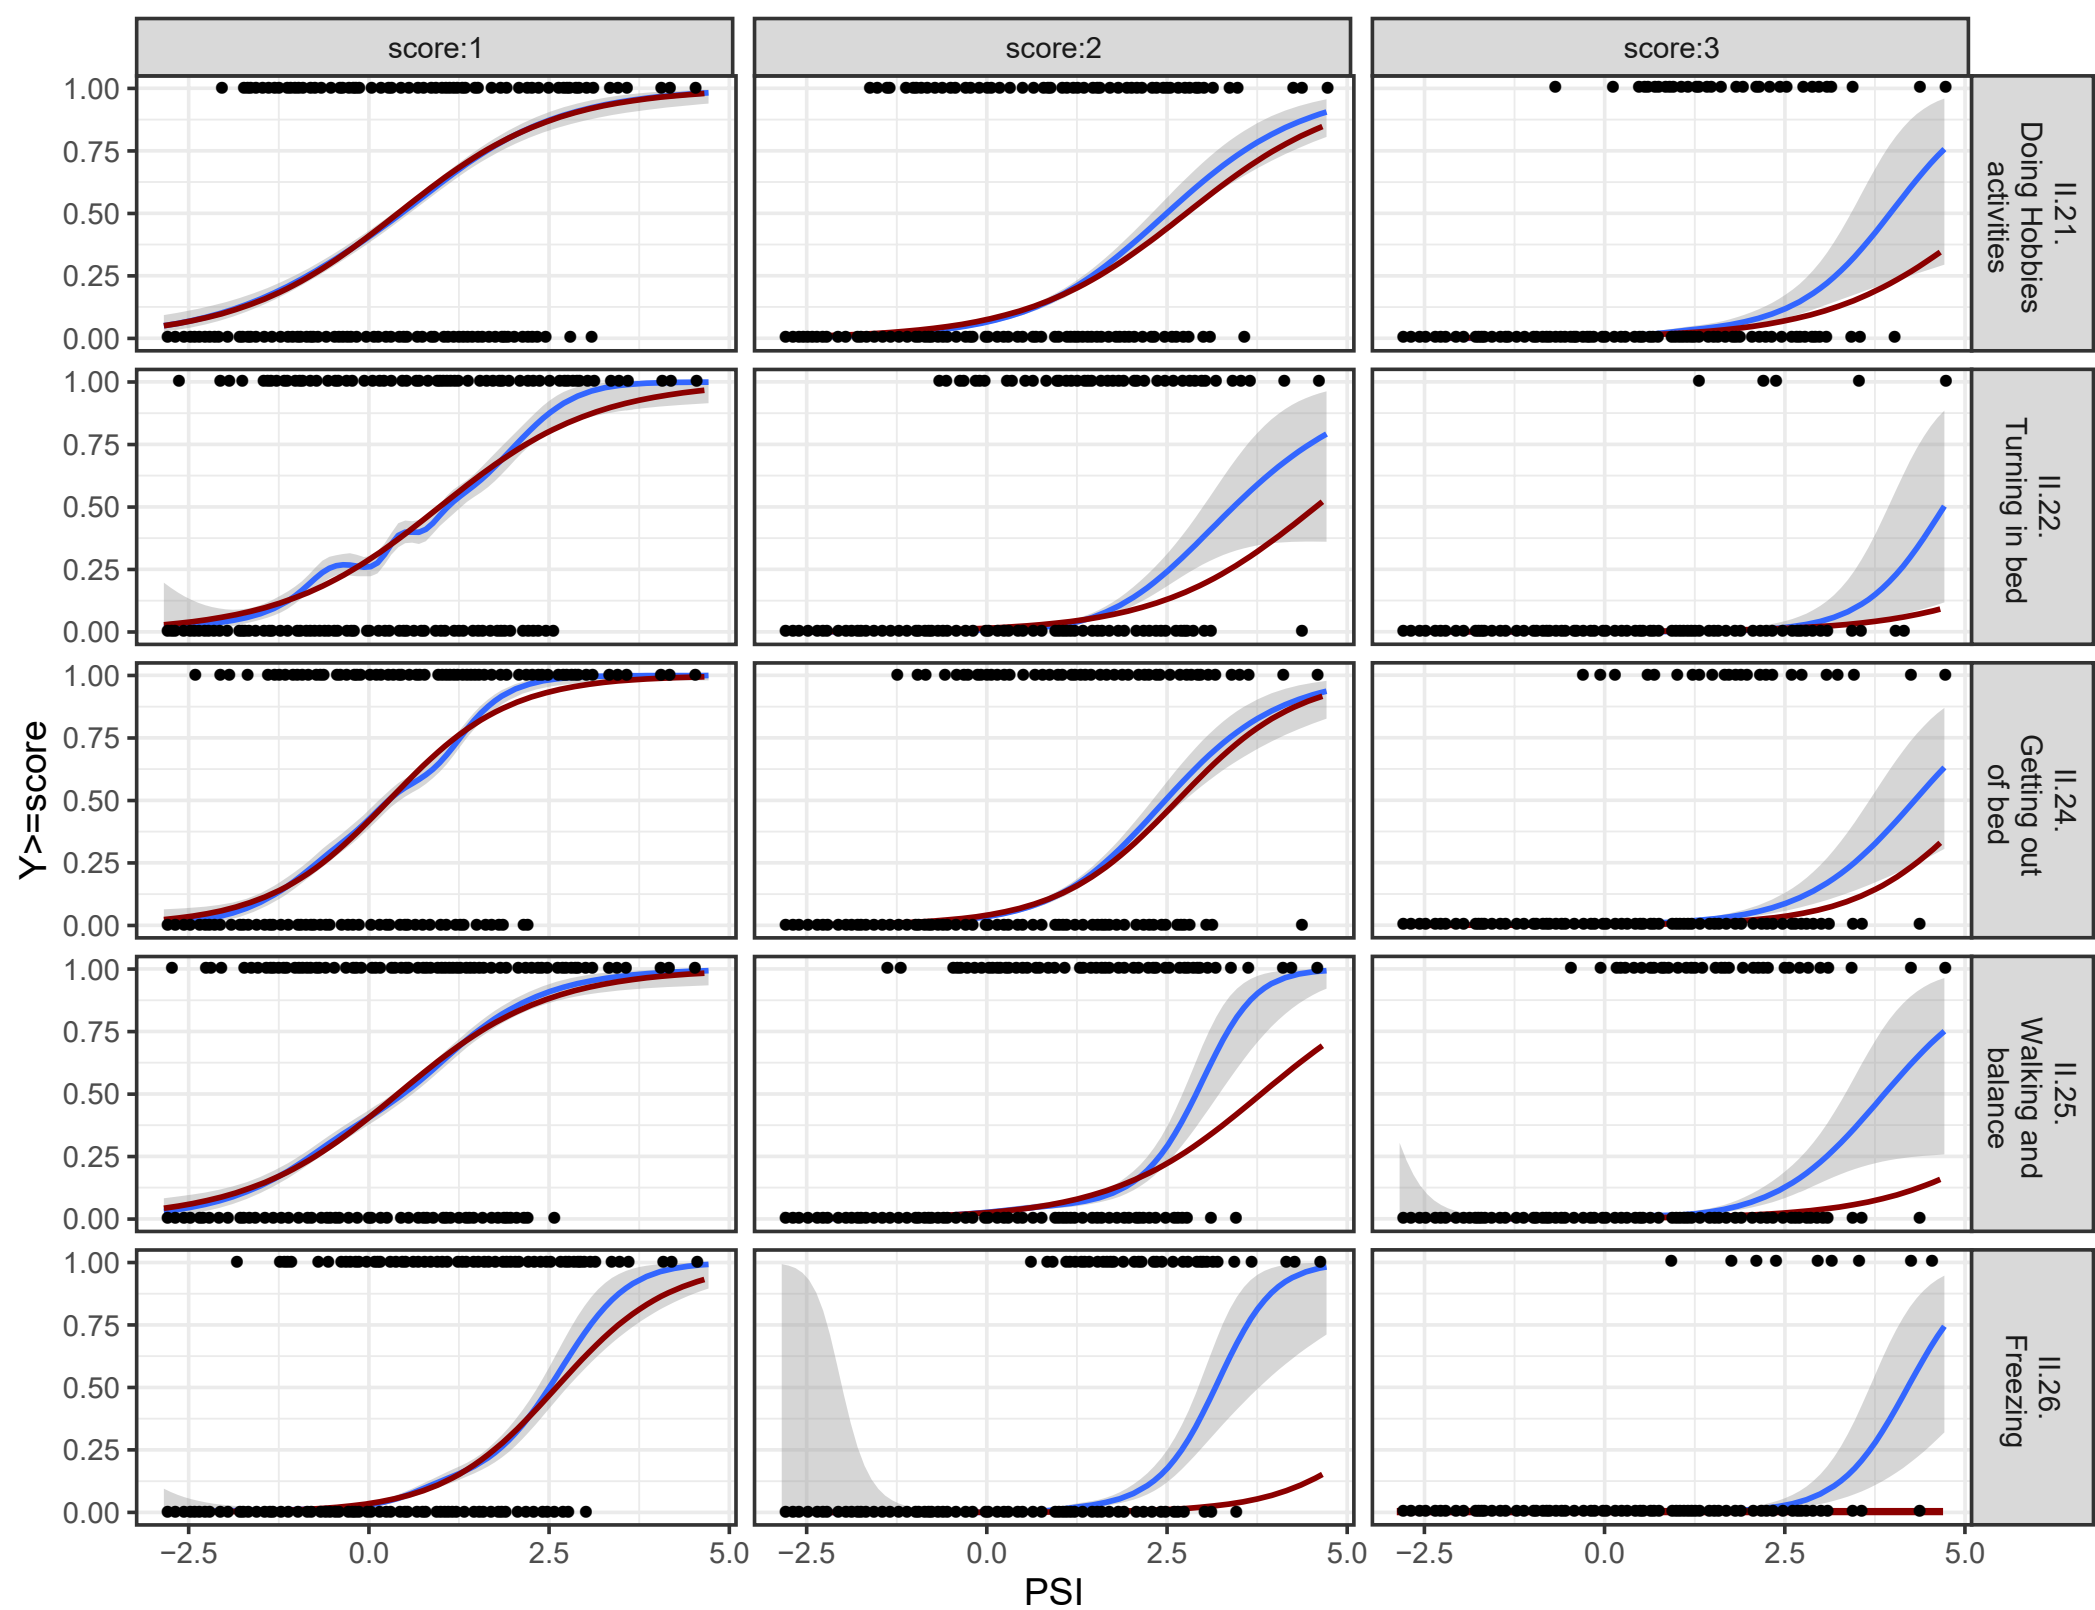

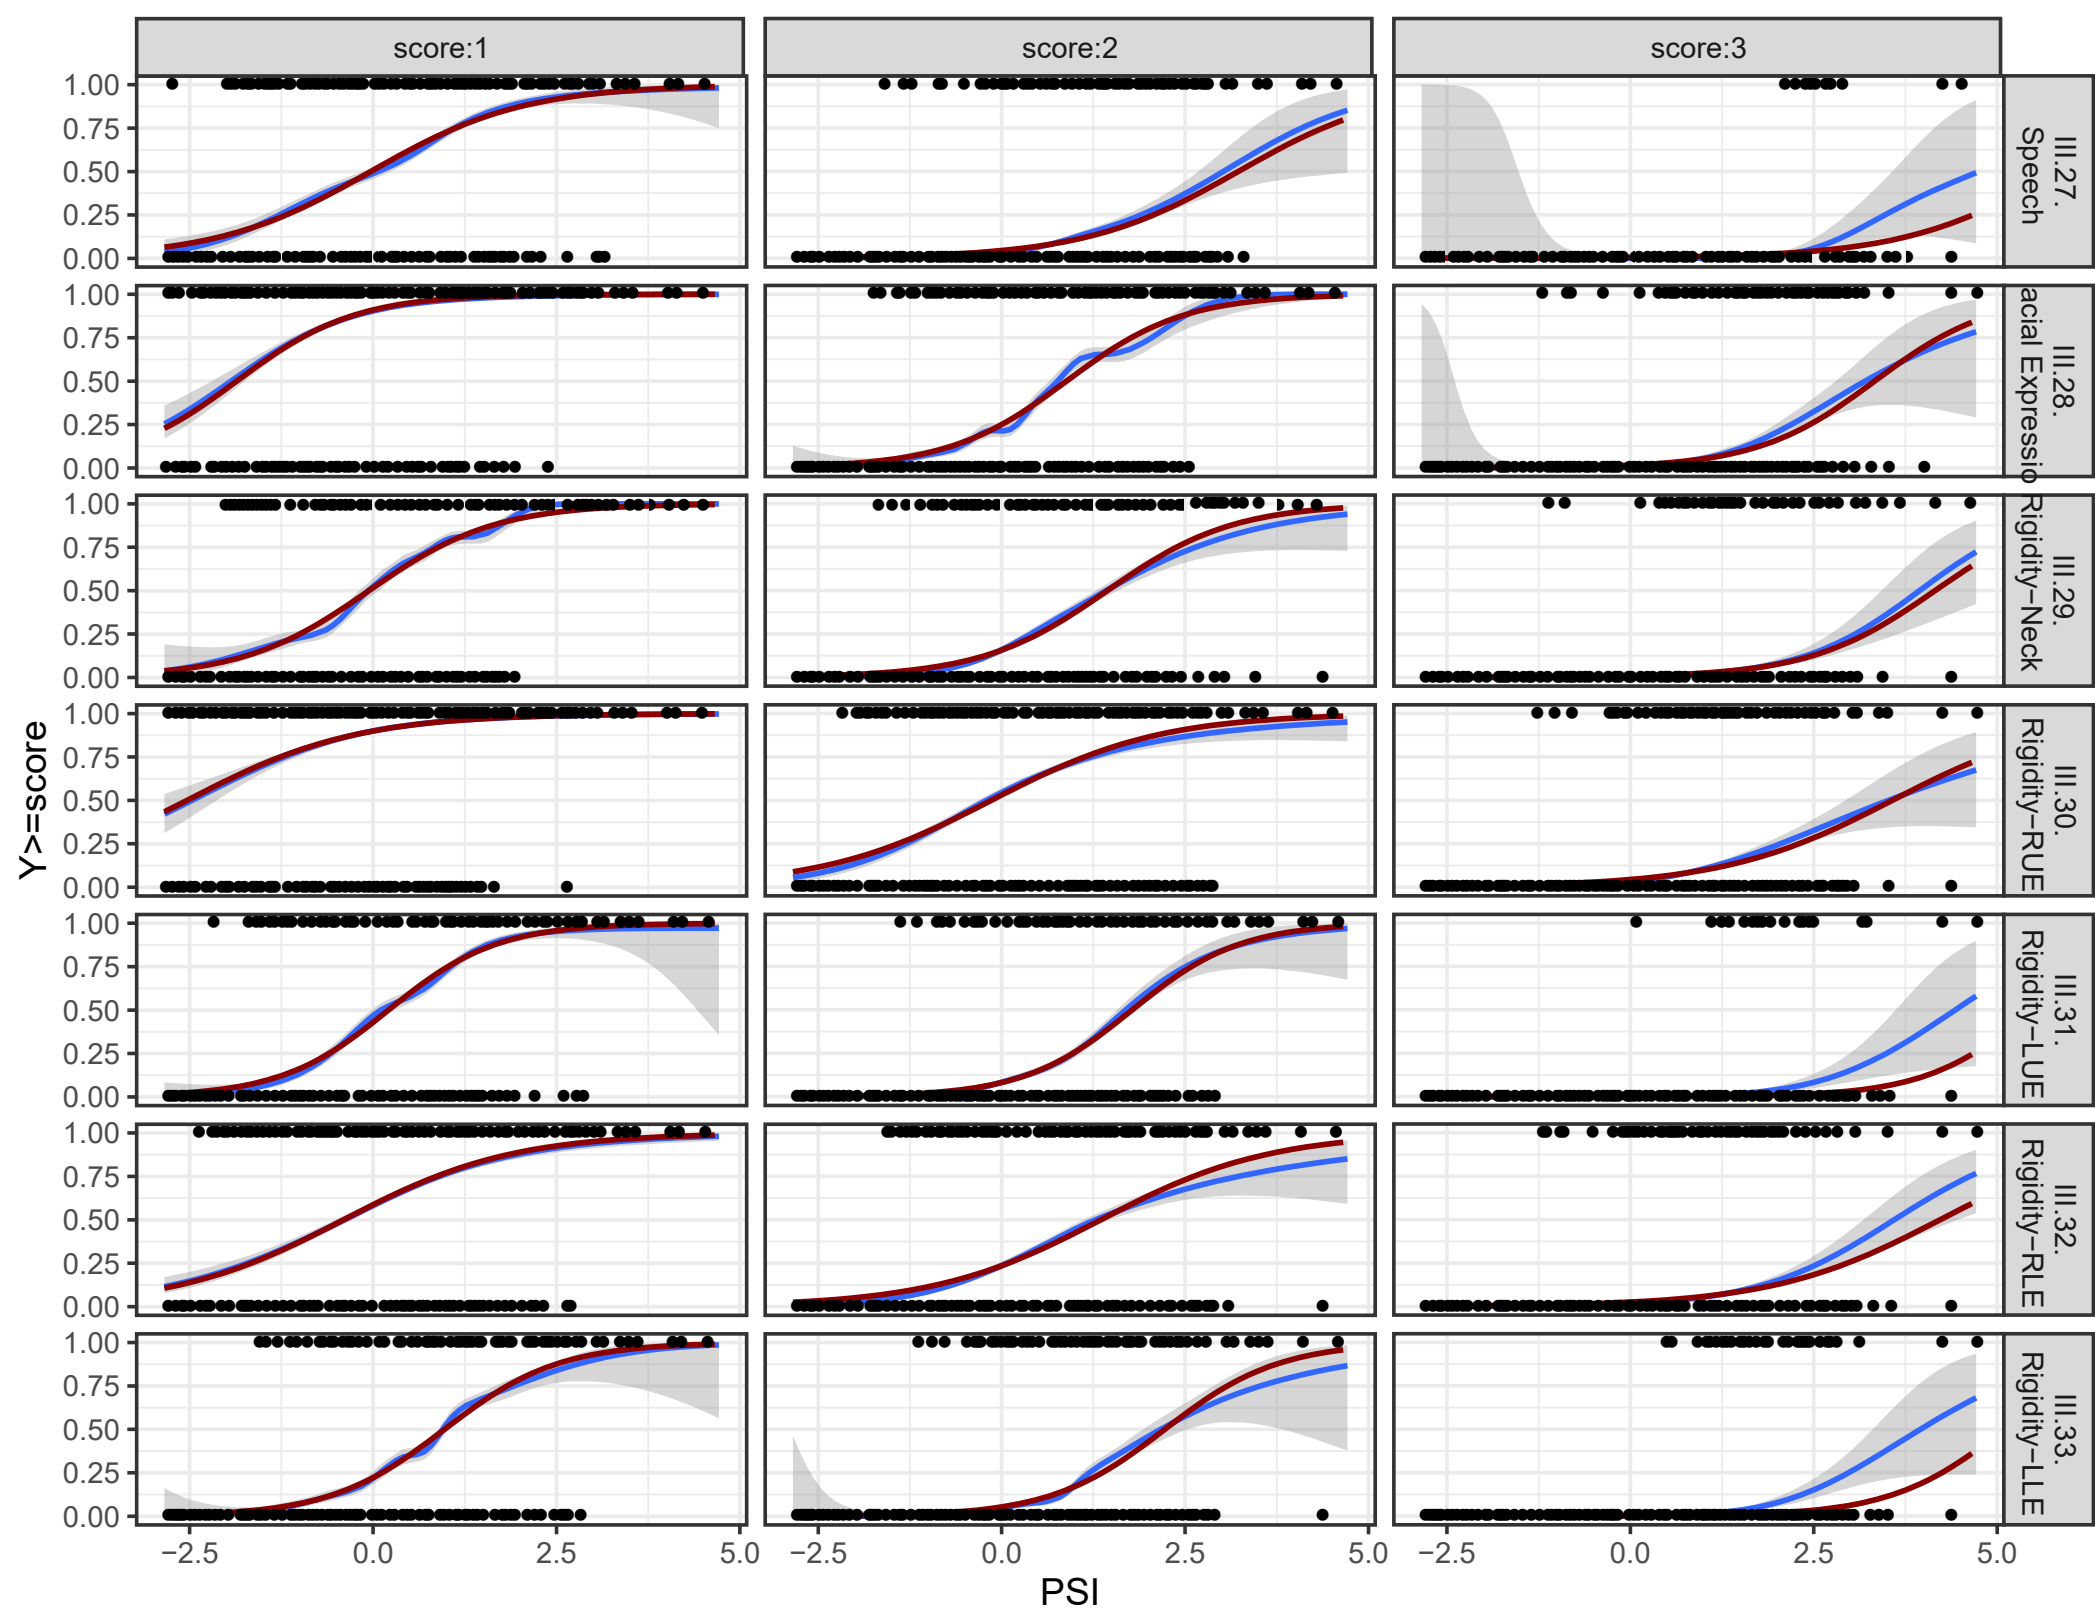



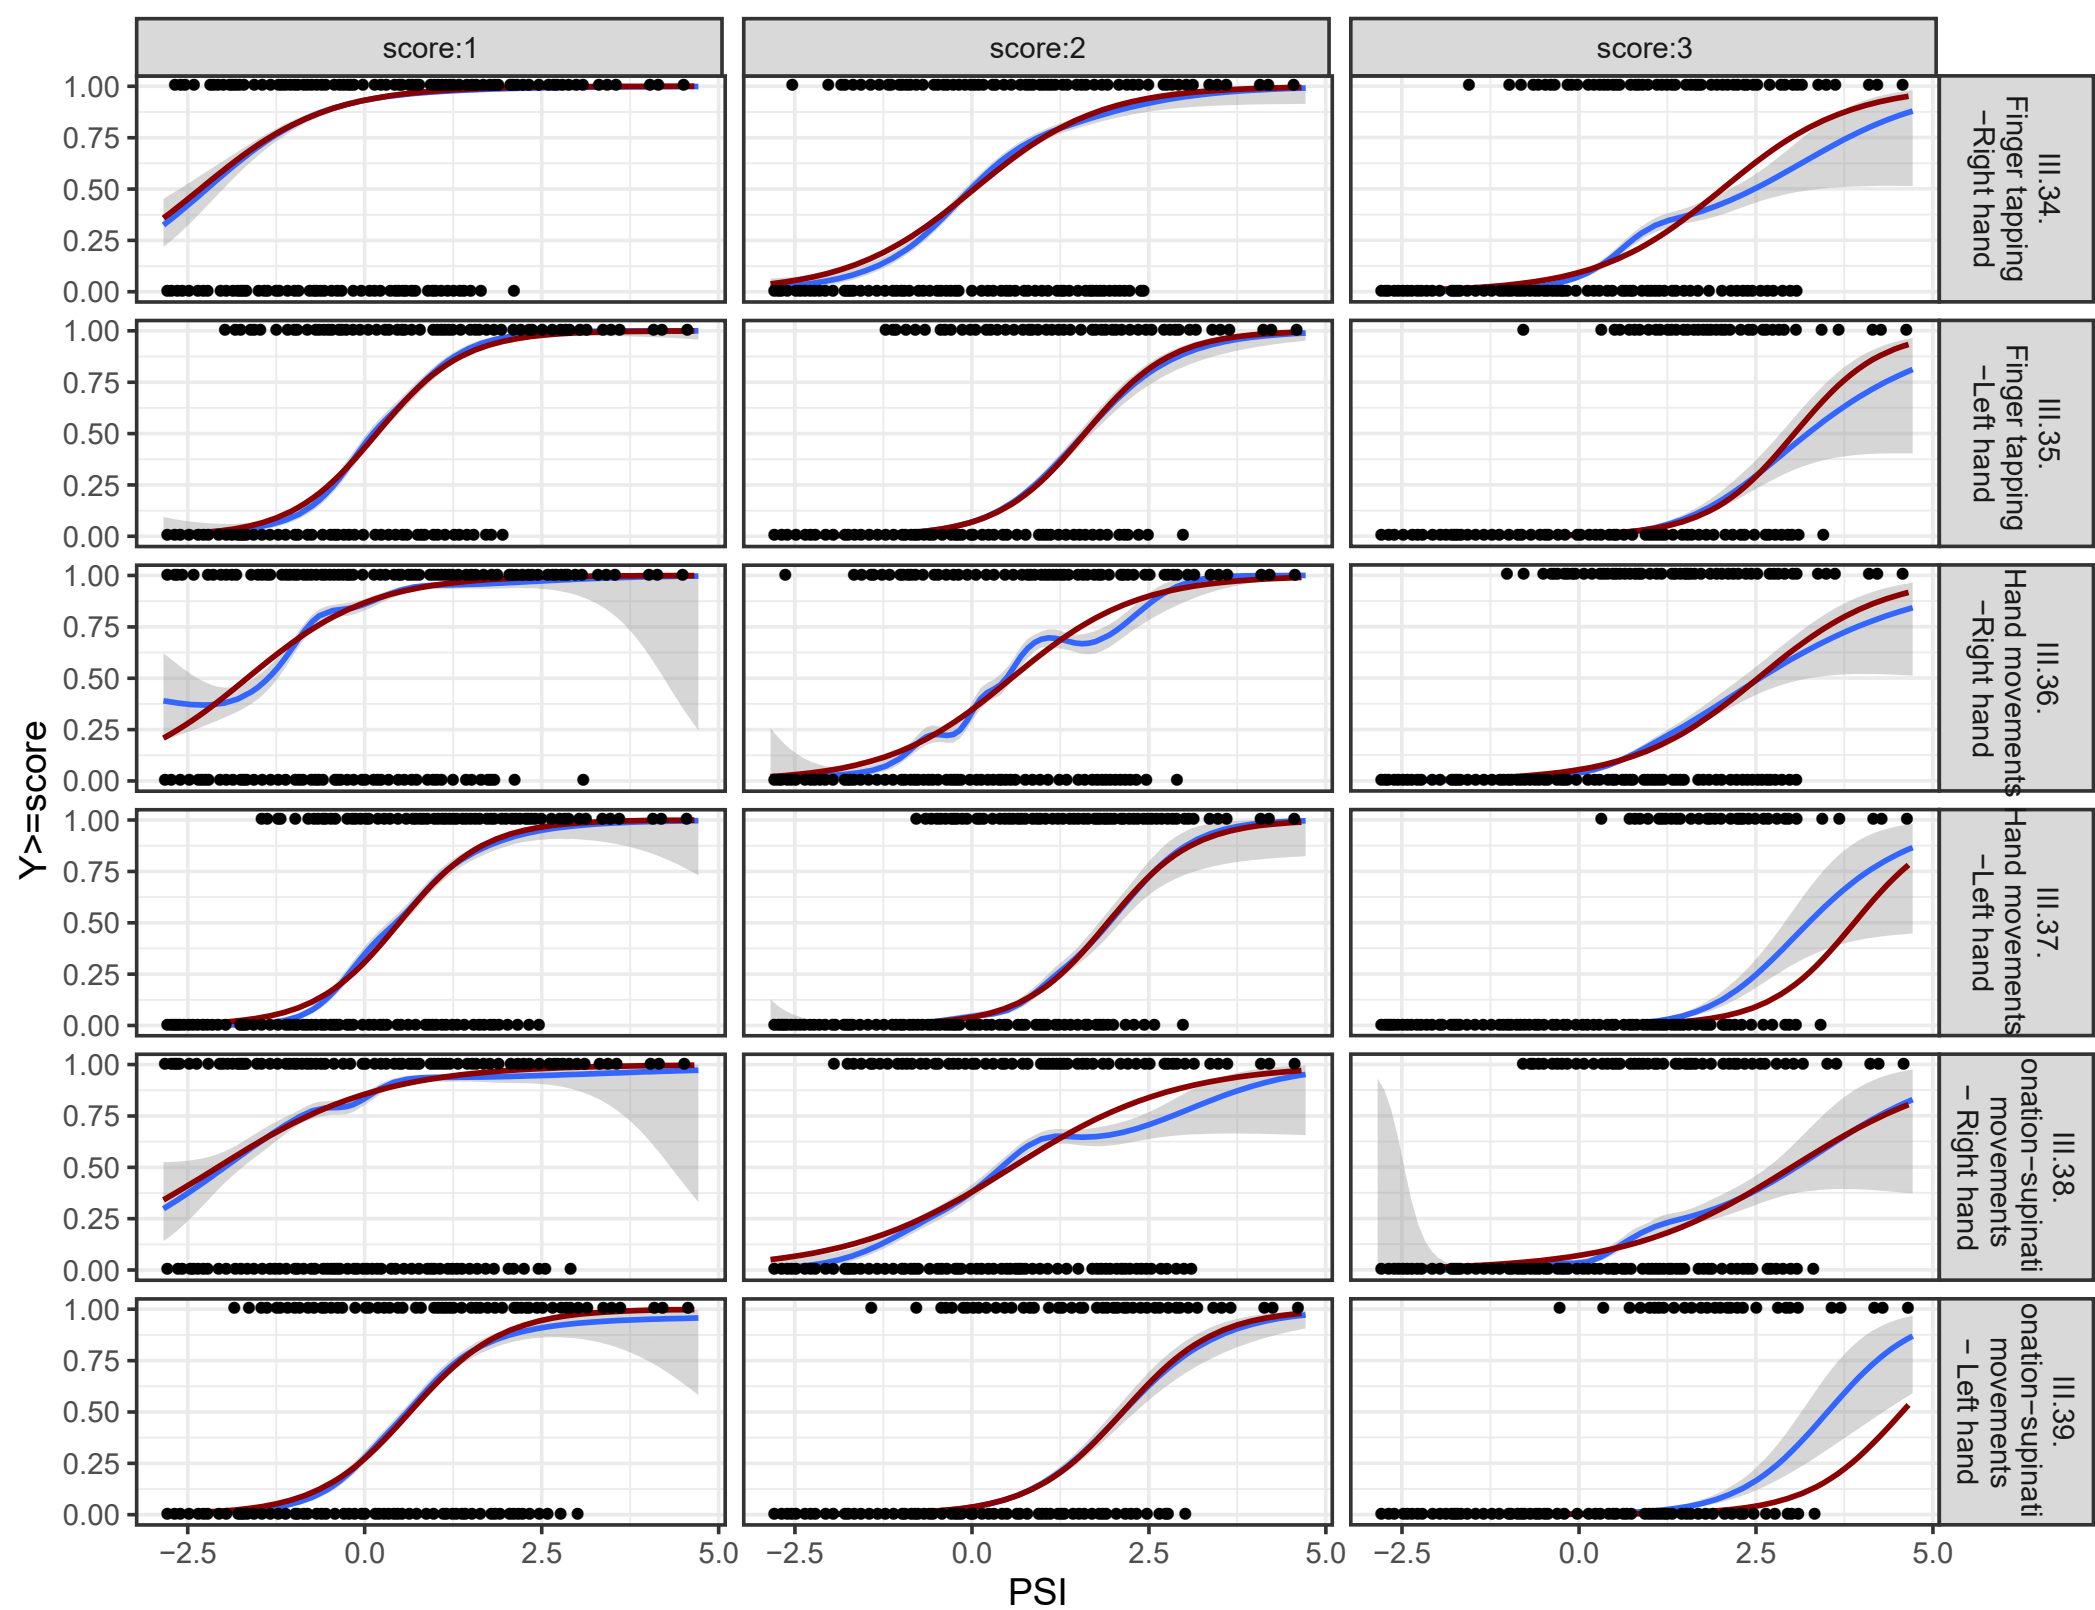

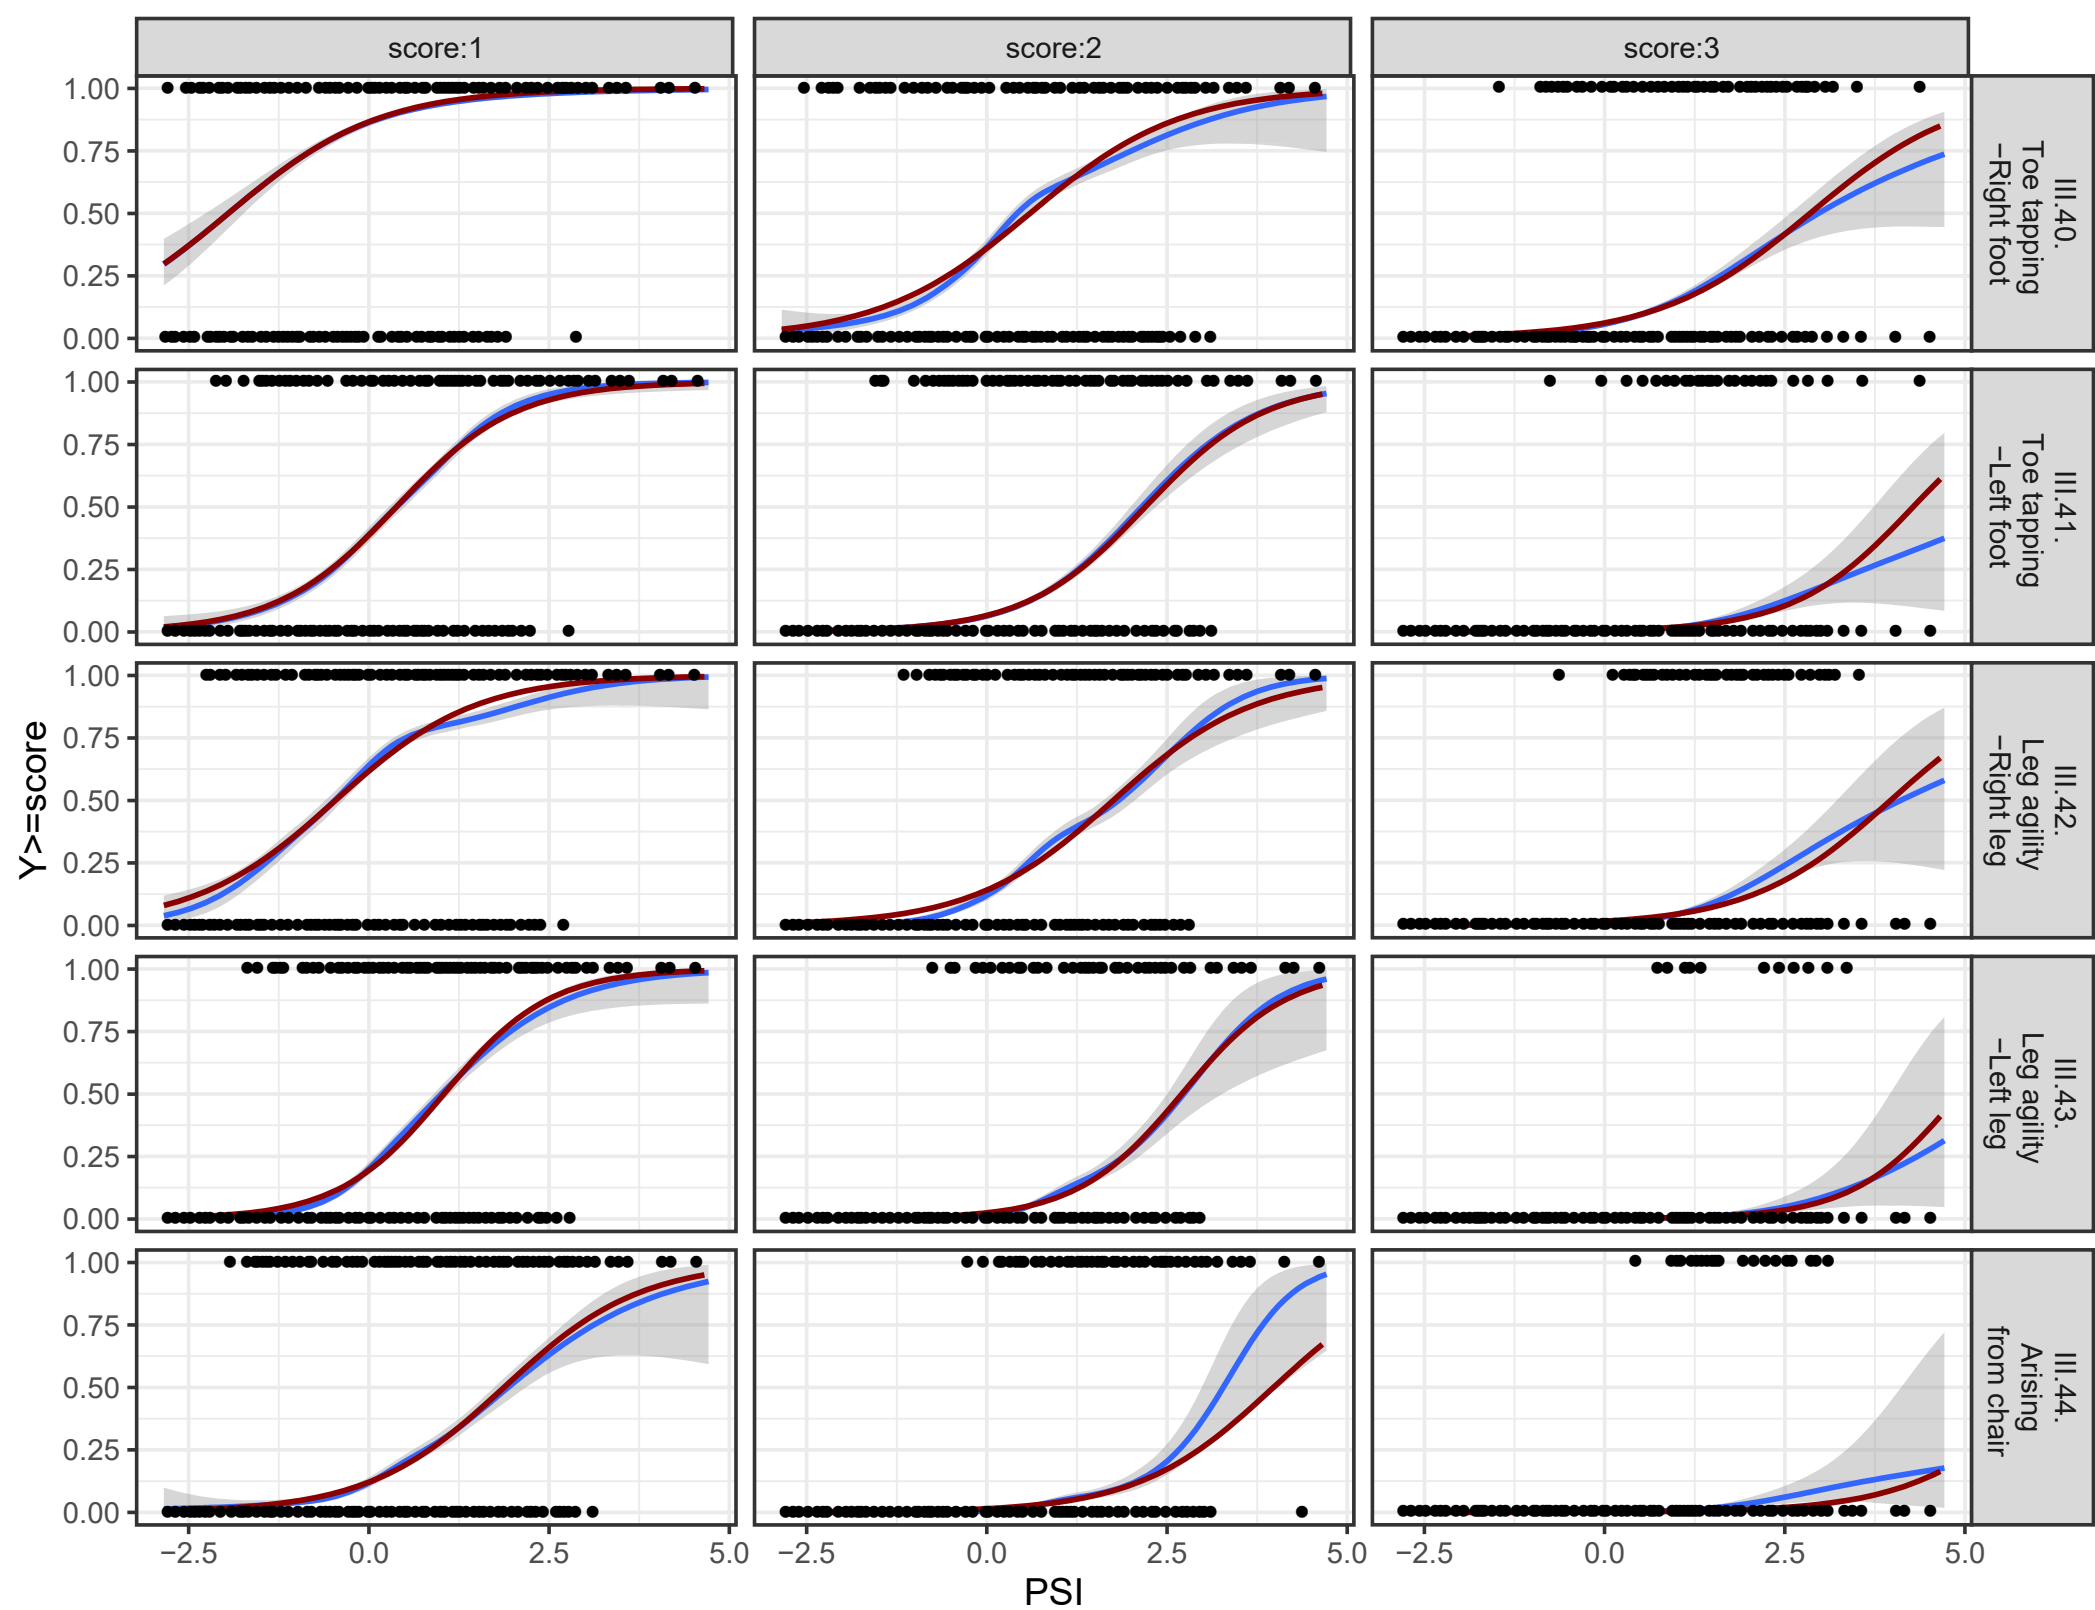

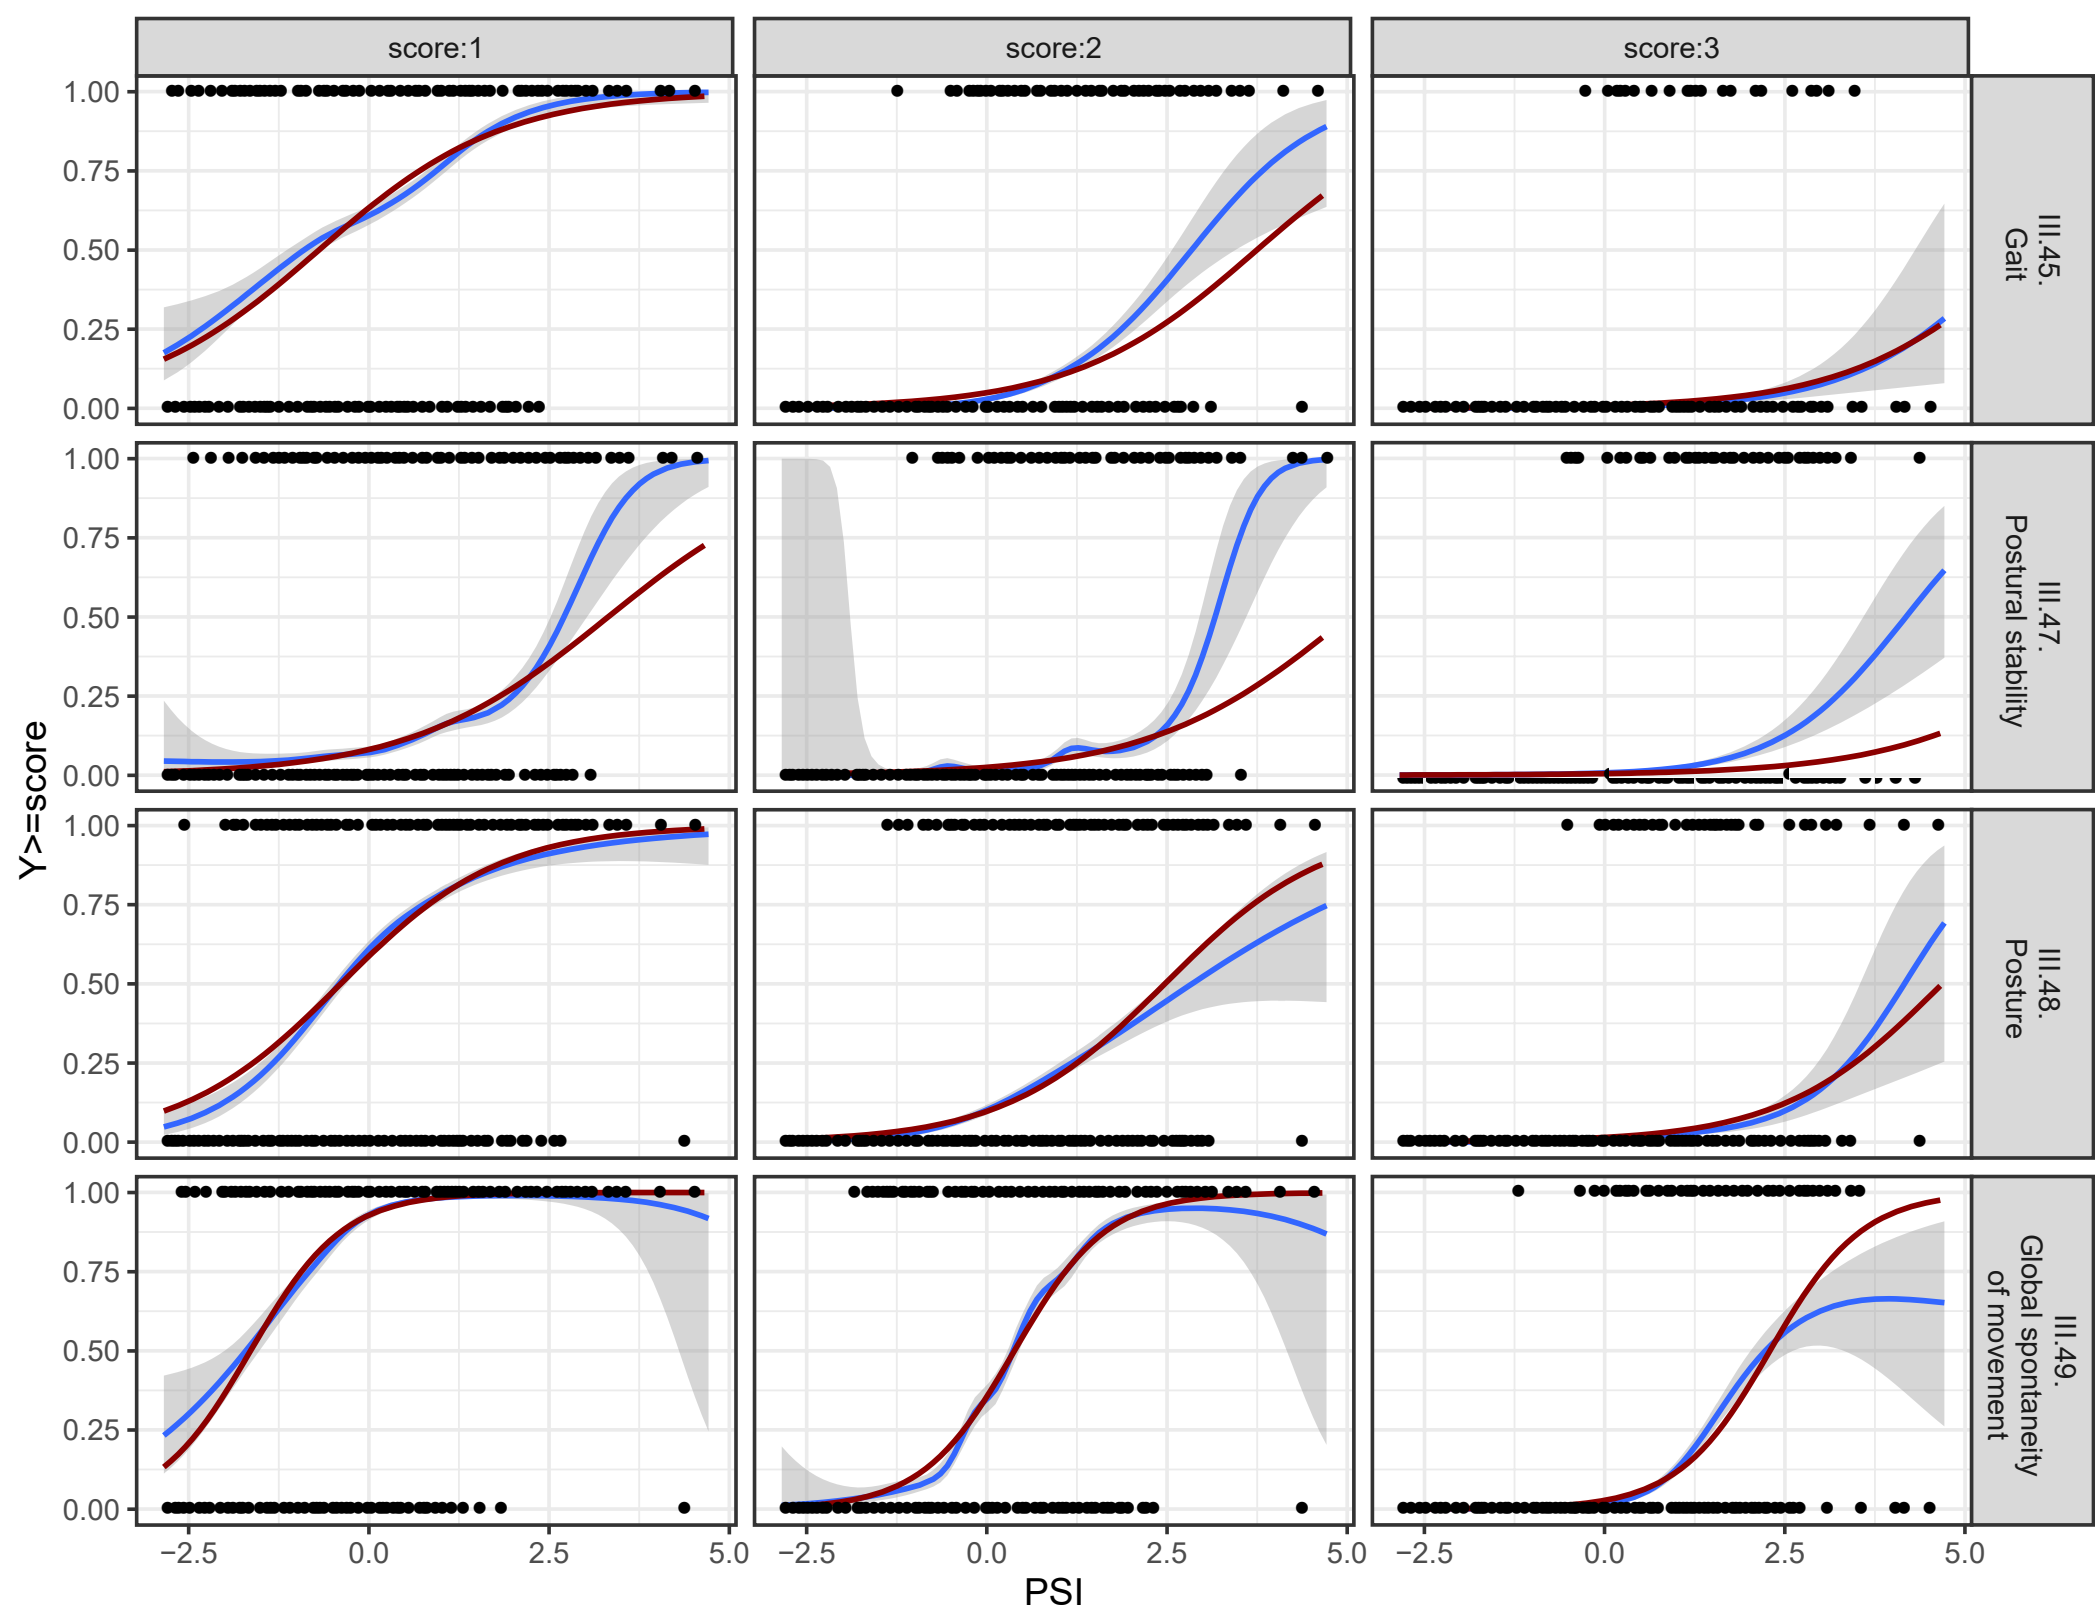

Supplement: 10928_2020_9697_MOESM2_ESM.pdf [file 10928_2020_9697_MOESM2_ESM.pdf]
