# Supplementary material for: Performance of longitudinal item response theory models in shortened or partial assessments
Source: PubMed Central journal article supplement (PMC7520414; doi:10.1007/s10928-020-09697-x), 2020-07-02
Supplement: 10928_2020_9697_MOESM1_ESM.pdf [file 10928_2020_9697_MOESM1_ESM.pdf]

## **Supplementary Materials 1**

Journal of Pharmacokinetics and Pharmacodynamics

Title: Performance of Longitudinal Item Response Theory Models in Shortened Assessments

Authors: Leticia Arrington<sup>1,2</sup>, Sebastian Ueckert<sup>1</sup>, Malidi Ahamadi<sup>2</sup>, Sreeraj Macha<sup>2</sup> and Mats O. Karlsson<sup>1,3</sup>

<sup>1</sup> Department of Pharmaceutical Biosciences, Uppsala University, P.O. Box 591, 751 24 Uppsala, Sweden

<sup>2</sup>Merck & Co. Inc. Kenilworth, NJ, USA

<sup>3</sup>Corresponding author: email [Mats.Karlsson@farmbio.uu.se](mailto:Mats.Karlsson@farmbio.uu.se) and phone +46 184 714 105

**Table S1 Estimated Population Disease Progression Slope Parameter Values and Uncertainty from the IR-Longitudinal Model for Observed Motor Subscale Data at each level of Information Content (removal of most informative items first)**

| <b>% Information</b> | <b>Disease Progression Rate (latent variable/yr.)</b> | <b>RSE%<sup>a</sup></b> | <b><math>\omega^b</math></b> | <b>RSE%<sup>a</sup></b> |
|----------------------|-------------------------------------------------------|-------------------------|------------------------------|-------------------------|
| 100%                 | 0.21                                                  | 10.8                    | 0.14                         | 13.2                    |
| 80%                  | 0.22                                                  | 10.9                    | 0.15                         | 13.4                    |
| 70%                  | 0.22                                                  | 11.1                    | 0.15                         | 13.9                    |
| 60%                  | 0.21                                                  | 12.0                    | 0.15                         | 15.6                    |
| 50%                  | 0.23                                                  | 10.0                    | 0.13                         | 14.5                    |
| 40%                  | 0.22                                                  | 11.0                    | 0.13                         | 15.7                    |
| 30%                  | 0.21                                                  | 11.0                    | 0.11                         | 17.3                    |
| 20%                  | 0.20                                                  | 11.3                    | 0.09                         | 19.9                    |
| 10%                  | 0.18                                                  | 12.9                    | 0.06                         | 24.9                    |

<sup>a</sup>Relative Standard Error is the SE/ parameter estimate \*100

<sup>b</sup>Variance of Random Effect

**Table S2 Estimated Population Disease Progression Slope Parameter Values and Uncertainty from the IR-Longitudinal Model for Observed Motor Subscale Data at each level of Information Content (removal of least informative items first)**

| <b>% Information</b> | <b>Disease Progression Rate (latent variable/yr.)</b> | <b>RSE%<sup>a</sup></b> | <b><math>\omega^b</math></b> | <b>RSE%<sup>a</sup></b> |
|----------------------|-------------------------------------------------------|-------------------------|------------------------------|-------------------------|
| 100%                 | 0.21                                                  | 10.8                    | 0.14                         | 13.2                    |
| 90%                  | 0.20                                                  | 11.4                    | 0.14                         | 13.7                    |
| 80%                  | 0.20                                                  | 11.1                    | 0.13                         | 14.2                    |
| 70%                  | 0.19                                                  | 11.3                    | 0.12                         | 14.8                    |
| 60%                  | 0.19                                                  | 10.7                    | 0.10                         | 15.1                    |
| 50%                  | 0.17                                                  | 11.7                    | 0.10                         | 15.6                    |
| 40%                  | 0.19                                                  | 10.1                    | 0.08                         | 15.7                    |
| 30%                  | 0.17                                                  | 11.5                    | 0.08                         | 17.8                    |
| 20%                  | 0.16                                                  | 12.6                    | 0.07                         | 19.5                    |

<sup>a</sup>Relative Standard Error is the SE/ parameter estimate \*100

<sup>b</sup>Variance of Random Effect

**Table S3 Estimated Population Disease Progression Slope and Drug Effect Parameter Values and Uncertainty from the IR-Longitudinal Model for Observed Motor Subscale Data at each level of Information Content (removal of most informative items first)**

| <b>% Information</b> | <b>Disease Progression Rate (latent variable/yr.) (RSE%<sup>a</sup>)</b> | <b><math>\omega^b</math>(RSE%)</b> | <b>Symptomatic Drug Effect (RSE%<sup>a</sup>)</b> | <b><math>\omega^b</math>(RSE%)</b> |
|----------------------|--------------------------------------------------------------------------|------------------------------------|---------------------------------------------------|------------------------------------|
| 100%                 | 0.38 ( 7.6 )                                                             | 0.12 ( 15.8 )                      | -0.39 ( 12.2 )                                    | 0.39 ( 16.6 )                      |
| 80%                  | 0.4 ( 7.2 )                                                              | 0.12 ( 15.2 )                      | -0.41 ( 11.8 )                                    | 0.39 ( 15.6 )                      |
| 70%                  | 0.4 ( 7.5 )                                                              | 0.12 ( 16.2 )                      | -0.42 ( 11.9 )                                    | 0.36 ( 15.9 )                      |
| 60%                  | 0.41 ( 7.3 )                                                             | 0.12 ( 16.1 )                      | -0.45 ( 11.4 )                                    | 0.36 ( 15.2 )                      |
| 50%                  | 0.4 ( 7.5 )                                                              | 0.1 ( 17.1 )                       | -0.39 ( 12.7 )                                    | 0.32 ( 16.7 )                      |
| 40%                  | 0.4 ( 7.8 )                                                              | 0.1 ( 18 )                         | -0.42 ( 12.5 )                                    | 0.3 ( 16.9 )                       |
| 30%                  | 0.36 ( 8.6 )                                                             | 0.08 ( 21.2 )                      | -0.38 ( 14 )                                      | 0.27 ( 19.6 )                      |
| 20%                  | 0.34 ( 9.1 )                                                             | 0.06 ( 23.7 )                      | -0.35 ( 15.3 )                                    | 0.19 ( 24.5 )                      |
| 10%                  | 0.27 ( 10.6 )                                                            | 0.04 ( 33.7 )                      | -0.24 ( 20.6 )                                    | 0.1 ( 41.3 )                       |

<sup>a</sup>Relative Standard Error is the SE/ parameter estimate \*100

<sup>b</sup>Variance of Random Effect

**Table S4 Estimated Population Disease Progression Slope and Drug Effect Parameter Values and Uncertainty from the IR-Longitudinal Model for Observed Motor Subscale Data at each level of Information Content (removal of least informative items first)**

| <b>% Information</b> | <b>Disease Progression Rate (latent variable/yr.) (RSE%<sup>a</sup>)</b> | <b><math>\omega^b</math>(RSE%)</b> | <b>Symptomatic Drug Effect (RSE%<sup>a</sup>)</b> | <b><math>\omega^b</math>(RSE%)</b> |
|----------------------|--------------------------------------------------------------------------|------------------------------------|---------------------------------------------------|------------------------------------|
| 100%                 | 0.38 ( 7.3 )                                                             | 0.12 ( 15.3 )                      | -0.39 ( 12.1 )                                    | 0.39 ( 16 )                        |
| 90%                  | 0.36 ( 7.5 )                                                             | 0.12 ( 15.4 )                      | -0.38 ( 12.3 )                                    | 0.36 ( 16.5 )                      |
| 80%                  | 0.34 ( 7.6 )                                                             | 0.1 ( 15.3 )                       | -0.33 ( 13.4 )                                    | 0.33 ( 16.9 )                      |
| 70%                  | 0.33 ( 8.1 )                                                             | 0.1 ( 15.8 )                       | -0.32 ( 14.2 )                                    | 0.31 ( 18.1 )                      |
| 60%                  | 0.31 ( 8.2 )                                                             | 0.08 ( 16.5 )                      | -0.3 ( 15.1 )                                     | 0.27 ( 19.1 )                      |
| 50%                  | 0.31 ( 8.5 )                                                             | 0.08 ( 17.4 )                      | -0.32 ( 14.4 )                                    | 0.26 ( 18.8 )                      |

|     |               |               |                |               |
|-----|---------------|---------------|----------------|---------------|
| 40% | 0.28 ( 8.9 )  | 0.06 ( 17.8 ) | -0.23 ( 18.9 ) | 0.2 ( 19.9 )  |
| 30% | 0.26 ( 10.2 ) | 0.06 ( 20 )   | -0.23 ( 19.7 ) | 0.19 ( 21.3 ) |
| 20% | 0.24 ( 11.3 ) | 0.05 ( 23.3 ) | -0.22 ( 21.8 ) | 0.15 ( 25.5 ) |

<sup>a</sup>Relative Standard Error is the SE/ parameter estimate \*100

<sup>b</sup>Variance of Random Effect

---
